# Supplementary material
Source: publisher figshare collection journal article supplement (https://acs.figshare.com/ndownloader/files/3809656)
Supplement: Supplementary file 1 [file 3809656]

Supporting Information for

**Organoselenium-Catalyzed, Hydroxy-Controlled Regio- and  
Stereoselective Amination of Terminal Alkenes: Efficient Synthesis of  
3-Amino Allylic Alcohols**

Zhimin Deng, Jialiang Wei, Lihao Liao, Haiyan Huang, and Xiaodan Zhao\*

*Institute of Organic Chemistry & MOE Key Laboratory of Bioinorganic and Synthetic Chemistry  
School of Chemistry and Chemical Engineering, Sun Yat-Sen University, Guangzhou 510275, China*

*E-mail: zhaoxd3@mail.sysu.edu.cn*

**Table of Contents:**

---

|                                                                                               |     |
|-----------------------------------------------------------------------------------------------|-----|
| 1. General considerations.....                                                                | S2  |
| 2. General experimental procedures .....                                                      | S2  |
| 3. Synthesis of substrates .....                                                              | S3  |
| 4. Analytic data for aminated products .....                                                  | S11 |
| 5. Analytic data for $\alpha,\beta$ -unsaturated aldehydes.....                               | S21 |
| 6. Experimental details for amination of the alkenes <b>9</b> , <b>13</b> and <b>14</b> ..... | S25 |
| 7. NMR study of amination of allylbenzene <b>9</b> .....                                      | S29 |
| 8. NMR spectra for new compounds .....                                                        | S32 |
| 9. Proton NMR spectra for <b>3a-3m</b> .....                                                  | S55 |
| 10. NMR spectra for amination of the alkenes <b>9</b> , <b>13</b> and <b>14</b> .....         | S62 |
| 11. Data for X-ray single crystal structure of <b>5c</b> .....                                | S68 |
| 12. References.....                                                                           | S73 |

## 1. General considerations

Unless otherwise noted, commercial reagents were purchased from Sigma-Aldrich, Alfa Aesar, TCI, J&K or Adamas and used without further purification. THF was distilled from sodium prior to use. EtOAc was distilled from P<sub>2</sub>O<sub>5</sub>. Deuterated chloroform was basified over potassium carbonate. Flash column chromatography was carried out using 200-300 mesh silica gel (Qingdao, China). All catalytic reactions were carried out using pre-dried glassware.

<sup>1</sup>H and <sup>13</sup>C{<sup>1</sup>H} NMR spectra were recorded on Bruker ARX 400 MHz spectrometer at ambient temperature. All NMR spectra are referenced to the residual solvent signal. Data for <sup>1</sup>H NMR are reported as follows: chemical shift (δ ppm), multiplicity (s = singlet, d = doublet, t = triplet, q = quartet, m = multiplet, br = broad), coupling constant (Hz), integration. Data for <sup>13</sup>C{<sup>1</sup>H} NMR are reported as follows: chemical shift (δ ppm), multiplicity (d = doublet, t = triplet, q = quartet), coupling constant (Hz).

MS and HRMS were recorded on Thermo MAT95XP mass spectrometer at analytical center of Sun Yat-Sen University or Bruker Agilent 1290 mass spectrometer at analytical center of South China University of Technology.

## 2. General experimental procedures

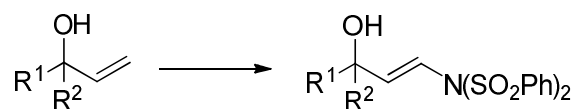

**General procedure for organoselenium-catalyzed amination of allylic alcohols:** A 5-mL glass vial was charged with a magnetic stir bar, allylic alcohol (0.20 mmol), NFSI (63.1 mg, 0.2 mmol), NaF (10.7 mg, 2.4 mmol), pyridine (17.8 mg, 0.20 mmol). A solution of PhSeSePh (3.2 mg, 0.01 mmol) in dry THF (1 mL) was subsequently added. Then the vial was capped. The mixture was stirred at ambient temperature for 4 hours. The solvent was removed on a rotary evaporator and the resultant residue

was directly purified by flash silica gel column chromatography to afford the corresponding desired product.

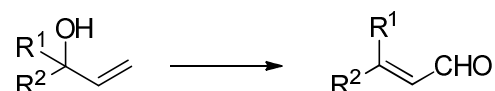

**General procedure for organoselenium-catalyzed synthesis of  $\alpha,\beta$ -unsaturated aldehydes:** A 5-mL glass vial was charged with a magnetic stir bar, PhSeSePh (3.2 mg, 0.01 mmol.) and NFSI (63.1 mg, 0.20 mmol). The vial was flushed three times with nitrogen. Then allylic alcohol (0.20 mmol) and ethyl acetate (1 mL) were subsequently added under nitrogen atmosphere. The vial was capped. The solution was stirred at ambient temperature for 12 hours. The solvent was removed on a rotary evaporator and the resultant residue was directly purified by flash silica gel column chromatography to afford the corresponding  $\alpha,\beta$ -unsaturated aldehyde.

### 3. Synthesis of substrates

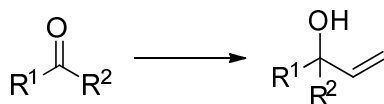

**General procedure for synthesis of allylic alcohols:** All allylic alcohols were synthesized according to the literature.<sup>[1]</sup> To a stirred solution of carbonyl compounds (2.00 mmol) in dry THF (10 mL) was added vinyl magnesium bromide (1.0 M in THF, 2 mL, 2.00 mmol) dropwise through a syringe at 0 °C. After stirring for 20 min the reaction mixture was allowed to warm to room temperature. The resulting mixture was stirred for additional 4 hours and then quenched by saturated NH<sub>4</sub>Cl solution (20 mL). The organic phase was extracted with ethyl acetate (30 mL x 3). The combined organic layers were washed with brine, dried over MgSO<sub>4</sub>, and concentrated under vacuum to afford the crude product. It was further purified by flash silica gel column chromatography.

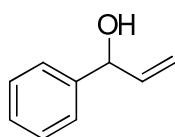

**1-Phenylprop-2-en-1-ol (1a):** Prepared by general procedure. Flash column chromatography (eluent: PE/EtOAc = 15:1, v/v) to give **1a** (238 mg, 1.78 mmol, 89%) as a colorless oil. This compound is known and its proton NMR spectrum is identical to that previously reported in the literature.<sup>[1]</sup> <sup>1</sup>H NMR (400 MHz, CDCl<sub>3</sub>) δ 7.41–7.33 (m, 4H), 7.33–7.27 (m, 1H), 6.13–5.99 (m, 1H), 5.36 (ddd, *J* = 16.5, 2.4, 1.3 Hz, 1H), 5.24–5.16 (m, 2H), 2.16 (br, 1H).

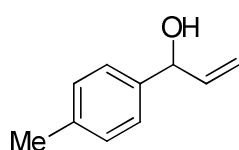

**1-(*p*-Tolyl)prop-2-en-1-ol (1b):** Prepared by general procedure. Flash column chromatography (eluent: PE/EtOAc = 15:1, v/v) to give **1b** (240 mg, 1.62 mmol, 81%) as a colorless oil. This compound is known and the proton spectrum is identical to that previously reported in the literature.<sup>[1]</sup> <sup>1</sup>H NMR (400 MHz, CDCl<sub>3</sub>) δ 7.27 (d, *J* = 8.1 Hz, 2H), 7.17 (d, *J* = 7.9 Hz, 2H), 6.28–5.91 (m, 1H), 5.42–5.29 (m, 1H), 5.27–5.11 (m, 2H), 2.35 (s, 3H), 1.90 (br, 1H).

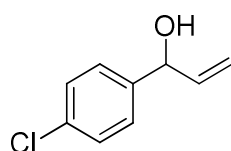

**1-(4-Chlorophenyl)prop-2-en-1-ol (1c):** Prepared by general procedure. Purified by silica gel column chromatography (eluent: PE/EtOAc = 30:1, v/v) to give **1c** as a colorless oil (672 mg, 4.00 mmol, 80 %). This compound is known and the proton spectrum is identical to that previously reported in the literature.<sup>[2]</sup> <sup>1</sup>H NMR (400 MHz, CDCl<sub>3</sub>) δ 7.38–7.28 (m, 4H), 6.08–5.95 (m, 1H), 5.35 (dt, *J* = 17.1, 1.2 Hz, 1H), 5.21 (dt, *J* = 16.9, 3.9 Hz, 2H), 1.96 (br, 1H).

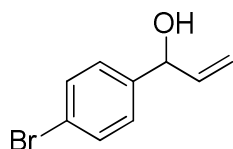

**1-(4-Bromophenyl)prop-2-en-1-ol (1d):** Prepared by general procedure. 4-Bromobenzaldehyde (920 mg, 5.00 mmol) and vinyl magnesium bromide (1.0 M in THF, 5.5 mL, 5.5 mmol) were used. The mixture was purified by silica gel column chromatography (eluent: PE/EtOAc = 30:1, v/v) to give **1d** as a colorless oil (848 mg, 4.00 mmol, 80 %). This compound is known and the <sup>1</sup>H NMR spectra is identical to

that previously reported in the literature.<sup>[3]</sup> <sup>1</sup>H NMR (400 MHz, CDCl<sub>3</sub>) δ 7.48 (dd, *J* = 8.1, 4.5 Hz, 2H), 7.33–7.17 (m, 2H), 6.00 (ddd, *J* = 16.4, 10.4, 5.3 Hz, 1H), 5.35 (d, *J* = 17.1 Hz, 1H), 5.20 (dd, *J* = 13.9, 9.9 Hz, 2H), 1.98 (br, 1H).

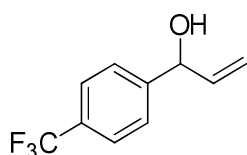

**1-(4-(Trifluoromethyl)phenyl)prop-2-en-1-ol (1e):** Prepared by general procedure. Flash column chromatography (eluent: PE/EtOAc = 15:1, v/v) to give **1e** (335 mg, 1.66 mmol, 83%) as a colorless oil. This compound is known and the proton NMR spectrum is identical to that previously reported in the literature.<sup>[1]</sup> <sup>1</sup>H NMR (400 MHz, CDCl<sub>3</sub>) δ 7.62 (d, *J* = 8.3 Hz, 2H), 7.50 (d, *J* = 8.1 Hz, 2H), 6.14–5.93 (m, 1H), 5.38 (dd, *J* = 17.1, 1.1 Hz, 1H), 5.33–5.16 (m, 2H), 2.04 (br, 1H).

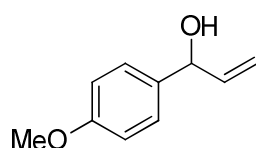

**1-(4-Methoxyphenyl)prop-2-en-1-ol (1f):** Prepared by general procedure. Flash column chromatography (eluent: PE/EtOAc = 10:1, v/v) to give **1f** (285 mg, 1.74 mmol, 87%) as a colorless oil. This compound is known and the proton NMR spectrum is identical to that previously reported in the literature.<sup>[3]</sup> <sup>1</sup>H NMR (400 MHz, CDCl<sub>3</sub>) δ 7.33–7.27 (m, 2H), 6.93–6.87 (m, 2H), 6.04 (ddd, *J* = 17.0, 10.3, 5.9 Hz, 1H), 5.33 (dt, *J* = 17.1, 1.3 Hz, 1H), 5.23–5.13 (m, 2H), 3.80 (s, 3H), 2.03 (br, 1H).

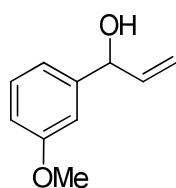

**1-(3-Methoxyphenyl)prop-2-en-1-ol (1g):** Prepared by general procedure. Flash column chromatography (eluent: PE/EtOAc = 10:1, v/v) to give **1g** (279 mg, 1.70 mmol, 85%) as a colorless oil. This compound is known and the proton NMR spectrum is identical to that previously reported in the literature.<sup>[3]</sup> <sup>1</sup>H NMR (400 MHz, CDCl<sub>3</sub>) δ 7.27 (t, *J* = 7.9 Hz, 1H), 6.95 (d, *J* = 7.3 Hz, 2H), 6.83 (ddd, *J* = 8.3, 2.5, 1.0 Hz, 1H), 6.04 (ddd, *J* = 17.1, 10.2, 6.1 Hz, 1H), 5.36 (dt, *J* = 17.0, 1.3 Hz, 1H), 5.20 (ddd, *J* = 6.1, 3.7, 2.5 Hz, 2H), 3.81 (s, 3H), 1.96 (br, 1H).

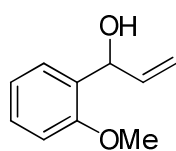

**1-(2-Methoxyphenyl)prop-2-en-1-ol (1h):** Prepared by general procedure. Flash column chromatography (eluent: PE/EtOAc = 10:1, v/v) to give **1h** (272 mg, 1.66 mmol, 83 %) as a colorless oil. This

compound is known and the proton NMR spectrum is identical to that previously reported in the literature.<sup>[1]</sup> <sup>1</sup>H NMR (400 MHz, CDCl<sub>3</sub>) δ 7.28 (ddd, *J* = 16.1, 7.8, 1.7 Hz, 2H), 7.00–6.87 (m, 2H), 6.14 (ddd, *J* = 17.2, 10.4, 5.5 Hz, 1H), 5.41 (t, *J* = 5.9, 1H), 5.31 (dt, *J* = 17.2, 1.6 Hz, 1H), 5.17 (dt, *J* = 10.4, 1.5 Hz, 1H), 3.87 (s, 3H), 2.78 (br, 1H).

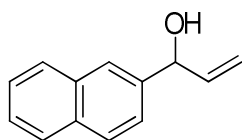

**1-(Naphthalen-2-yl)prop-2-en-1-ol (1i):** Prepared by general procedure. Flash column chromatography (eluent: PE/EtOAc = 15:1, v/v) to give **1i** (305 mg, 1.66 mmol, 83 %) as a yellow oil.

This compound is known and the proton NMR spectrum is identical to that previously reported in the literature.<sup>[1]</sup> <sup>1</sup>H NMR (400 MHz, CDCl<sub>3</sub>) δ 7.84 (dd, *J* = 8.2, 3.8 Hz, 4H), 7.56–7.42 (m, 3H), 6.13 (ddd, *J* = 17.0, 10.3, 6.0 Hz, 1H), 5.41 (dt, *J* = 17.1, 1.3 Hz, 1H), 5.35 (d, *J* = 5.7, 1H), 5.25 (dt, *J* = 10.3, 1.3 Hz, 1H), 2.50 (br, 1H).

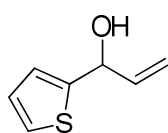

**1-(Thiophen-2-yl)prop-2-en-1-ol (1j):** Prepared by general procedure. Thiophene-2-carbaldehyde (448 mg, 4.00 mmol) and vinyl magnesium bromide (1.0 M in THF, 4.4 mL, 4.4 mmol) were used.

The residue was purified by silica gel column chromatography (eluent: PE/EtOAc = 30:1, v/v) to give **1j** as an orange oil (168 mg, 1.20 mmol, 30%). This compound is known and the proton NMR spectrum is identical to that previously reported in the literature.<sup>[1]</sup> <sup>1</sup>H NMR (400 MHz, CDCl<sub>3</sub>) δ 7.28 (dd, *J* = 4.8, 1.4 Hz, 1H), 7.02–6.96 (m, 2H), 6.21–6.06 (m, 1H), 5.50–5.36 (m, 2H), 5.26 (dt, *J* = 10.4, 1.1 Hz, 1H), 2.07 (br, 1H).

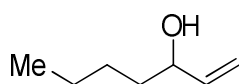

**Hept-1-en-3-ol (1k):** Prepared by general procedure. Pentanal (4 mmol) and vinyl magnesium bromide (1.0 M in THF, 6.0 mmol,

6.0 mL) were used. The residue was purified by flash column chromatography to give **1k** as pale yellow oil (302 mg, 2.65 mmol, 66%). This compound is known and the proton NMR spectrum is identical to that previously reported in the literature.<sup>[4]</sup> <sup>1</sup>H NMR (400 MHz, CDCl<sub>3</sub>) δ 5.87 (ddd, *J* = 16.9, 10.4, 6.2 Hz, 1H), 5.22 (dt, *J* = 17.2, 1.4 Hz, 1H), 5.10 (dt, *J* = 10.4, 1.3 Hz, 1H), 4.10 (q, *J* = 6.3 Hz, 1H), 1.60–1.45 (m, 2H), 1.43–1.19 (m, 4H), 0.98–0.80 (m, 3H).

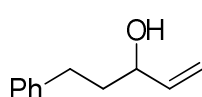

**5-Phenylpent-1-en-3-ol (1l)**: Prepared by general procedure. Flash column chromatography (eluent: PE/EA = 30:1 to 5:1, v/v) to give **1l** as pale yellow liquid (169 mg, 1.04 mmol, 52%). This compound is known and the proton NMR spectrum is identical to that previously reported in the literature.<sup>[1]</sup> <sup>1</sup>H NMR (400 MHz, CDCl<sub>3</sub>) δ 7.34–7.27 (m, 2H), 7.25–7.17 (m, 3H), 5.99–5.85 (m, 1H), 5.26 (dt, *J* = 17.2, 1.4 Hz, 1H), 5.20–5.12 (m, 1H), 4.24–3.97 (m, 1H), 2.86–2.61 (m, 2H), 1.97–1.79 (m, 2H), 1.74 (br, 1H).

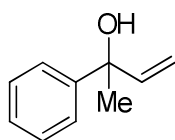

**2-Phenylbut-3-en-2-ol (1m)**: Prepared by general procedure. Acetophenone (480 mg, 4.00 mmol) and vinyl magnesium bromide (1.0 M in THF, 4.8 mL, 4.8 mmol) were used. The residue was purified by silica gel column chromatography (eluent: PE/EtOAc = 15:1, v/v) to give **1m** as a colorless liquid (473 mg, 3.20 mmol, 80 %). This compound is known and the proton NMR spectrum is identical to that previously reported in the literature.<sup>[5]</sup> <sup>1</sup>H NMR (400 MHz, CDCl<sub>3</sub>) δ 7.52–7.44 (m, 2H), 7.39–7.30 (m, 2H), 7.29–7.20 (m, 1H), 6.18 (dd, *J* = 17.3, 10.6 Hz, 1H), 5.30 (dd, *J* = 17.3, 1.0 Hz, 1H), 5.15 (dd, *J* = 10.6, 1.0 Hz, 1H), 1.88 (br, 1H), 1.66 (s, 3H).

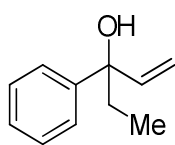

**3-Phenylpent-1-en-3-ol (1n)**: Prepared by general procedure. Flash column chromatograph (eluent: PE/EtOAc = 15:1, v/v) to give the **1n** (211 mg, 1.30 mmol, 65 %) as a yellow oil. This compound is known and the proton NMR spectrum is identical to that previously reported in the

literature.<sup>[6]</sup> <sup>1</sup>H NMR (400 MHz, CDCl<sub>3</sub>) δ 7.48–7.42 (m, 2H), 7.39–7.31 (m, 2H), 7.29–7.21 (m, 1H), 6.20 (dd, *J* = 17.3, 10.7 Hz, 1H), 5.30 (dd, *J* = 17.3, 1.1 Hz, 1H), 5.17 (dd, *J* = 10.7, 1.1 Hz, 1H), 2.06–1.85 (m, 2H), 1.81 (br, 1H), 0.85 (t, *J* = 7.4 Hz, 3H).

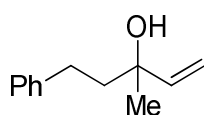

**3-Methyl-5-phenylpent-1-en-3-ol (1o):** Prepared by general procedure. Flash column chromatograph (eluent: PE/EtOAc = 15:1, v/v) to give **1o** (229 mg, 1.30 mmol, 65 %) as a yellow oil. This

compound is known and the proton NMR spectrum is identical to that previously reported in the literature.<sup>[7]</sup> <sup>1</sup>H NMR (400 MHz, CDCl<sub>3</sub>) δ 7.31–7.24 (m, 2H), 7.23–7.14 (m, 3H), 5.98 (dd, *J* = 17.3, 10.8 Hz, 1H), 5.27 (dd, *J* = 17.3, 1.1 Hz, 1H), 5.12 (dd, *J* = 10.8, 1.1 Hz, 1H), 2.77–2.53 (m, 2H), 1.95–1.74 (m, 2H), 1.46 (br, 1H), 1.35 (s, 3H).

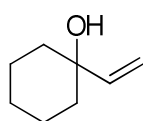

**1-Vinylcyclohexanol (1p):** Prepared by general procedure. Flash column chromatography (eluent: PE/EtOAc = 15:1, v/v) to give **1p** as a colorless liquid (206 mg, 1.64 mmol, 41 %). This compound is known and the

proton NMR spectrum is identical to that previously reported in the literature.<sup>[5]</sup> <sup>1</sup>H NMR (400 MHz, CDCl<sub>3</sub>) δ 5.98 (dd, *J* = 17.4, 10.8 Hz, 1H), 5.25 (dd, *J* = 17.4, 1.3 Hz, 1H), 5.04 (dd, *J* = 10.8, 1.3, 1H), 1.78–1.43 (m, 10H).

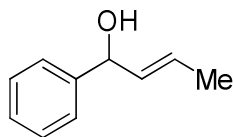

**(E)-1-Phenylbut-2-en-1-ol (4a):** Prepared by general procedure.

(E)-But-2-enal (441 mg, 5.00 mmol) was used. The residue was purified by silica gel column chromatography (eluent: PE/EtOAc = 15:1, v/v) to give **4a** as a colorless liquid (518 mg, 3.50 mmol, 70 %). This compound is known and the proton NMR spectrum is identical to that previously reported in the literature.<sup>[8]</sup> <sup>1</sup>H NMR (400 MHz, CDCl<sub>3</sub>) δ 7.42–7.31 (m, 4H), 7.31–7.23 (m, 1H), 5.84–5.64 (m, 2H), 5.17 (dd, *J* = 6.4, 3.2 Hz, 1H), 1.87 (br, 1H), 1.77–1.66 (m, 3H).



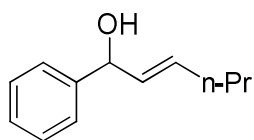

**(E)-1-Phenylhex-2-en-1-ol (4b):** Prepared by general procedure.

(E)-Hex-2-enal (490 mg, 5 mmol) was used. The residue was purified by silica gel column chromatography (eluent: PE/EtOAc = 15:1, v/v) to give **4b** as a colorless liquid (660 mg, 3.75 mmol, 75 %). This compound is known and the proton NMR spectrum is identical to that previously reported in the literature.<sup>[9]</sup> <sup>1</sup>H NMR (400 MHz, CDCl<sub>3</sub>) δ 7.42–7.31 (m, 4H), 7.31–7.21 (m, 1H), 5.83–5.59 (m, 2H), 5.17 (dd, *J* = 6.5, 3.6 Hz, 1H), 2.04 (dd, *J* = 14.1, 7.0 Hz, 2H), 1.85 (br, 1H), 1.49–1.35 (m, 2H), 0.91 (q, *J* = 7.1 Hz, 3H).

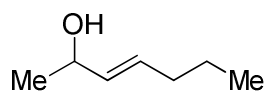

**(E)-Hept-3-en-2-ol (4c):** To a solution of (E)-hept-3-en-2-one (336 mg, 3 mmol) in methanol (4 mL) at 0 °C was added sodium borohydride (342 mg, 9 mmol) in methanol (4 mL).

The reaction was stirred and slowly warmed to room temperature over 3 h, and then quenched with saturated aqueous NH<sub>4</sub>Cl (10 mL). The resultant mixture was concentrated in vacuo and the residue was extracted with EtOAc (10 mL x 3). The combined organic layers were washed with brine, dried over MgSO<sub>4</sub> and concentrated in vacuo. The residue was purified by flash chromatography (eluent: PE/EtOAc = 10:1, v/v) to afford **4d** as a colorless liquid (280 mg, 2.5 mmol, 82%). This compound is known and the proton NMR spectrum is identical to that previously reported in the literature.<sup>[10]</sup> <sup>1</sup>H NMR (400 MHz, CDCl<sub>3</sub>) δ 5.62 (dt, *J* = 15.2, 6.5 Hz, 1H), 5.51 (dd, *J* = 15.4, 6.5 Hz, 1H), 4.26 (p, *J* = 6.3 Hz, 1H), 1.99 (q, *J* = 7.1 Hz, 2H), 1.44–1.34 (m, 2H), 1.25 (d, *J* = 6.3 Hz, 3H), 0.89 (t, *J* = 7.4 Hz, 3H).

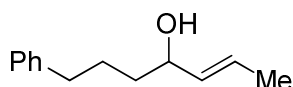

**(E)-7-Phenylhept-2-en-4-ol (4d):** Prepared by general procedure. (E)-Hex-2-enal (252 mg, 3.6 mmol) was used.

The residue was purified by silica gel column chromatography (eluent: PE/EtOAc = 15:1, v/v) to give **4c** as a colorless liquid (561 mg, 3.0 mmol, 82%). This compound is known and the proton NMR spectrum is identical to that previously reported in the literature.<sup>[11]</sup> <sup>1</sup>H NMR (400 MHz, CDCl<sub>3</sub>) δ 7.32–7.24 (m, 2H), 7.18 (dd, *J* = 5.0, 2.7

Hz, 3H), 5.73–5.57 (m, 1H), 5.47 (ddd,  $J = 15.3, 7.2, 1.5$  Hz, 1H), 4.05 (d,  $J = 4.7$  Hz, 1H), 2.63 (t,  $J = 7.4$  Hz, 2H), 1.78–1.45 (m, 7H), 1.39 (br, 1H).

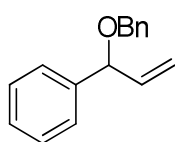

**(1-(Benzyloxy)allyl)benzene (7a):** To 1-phenylprop-2-en-1-ol (268 mg, 2.00 mmol) in anhydrous THF (5 mL) was added NaH (60% in mineral oil, 92 mg, 2.30 mmol) at room temperature. The mixture was stirred for 30 min and then cooled to 0 °C. Benzyl bromide (340 mg, 2.00 mmol) was added dropwise. The resulting mixture was warmed to room temperature and stirred overnight. The reaction was quenched by water (5 mL) and the organic phase was extracted with ethyl acetate (5 mL x 3). The combined organic layers were washed with brine and dried over  $\text{MgSO}_4$ . The solvent was removed in vacuo and the residue was purified by silica gel column chromatography (eluent: PE) to give the desired product **7a** as a colorless liquid (148 mg, 0.66 mmol, 33 %). This compound is known and the  $^1\text{H}$  NMR spectra is identical to that previously reported in the literature.<sup>[12]</sup>  $^1\text{H}$  NMR (400 MHz,  $\text{CDCl}_3$ )  $\delta$  7.45–7.26 (m, 10H), 5.99 (ddd,  $J = 17.0, 10.3, 6.6$  Hz, 1H), 5.27 (ddt,  $J = 23.8, 10.3, 1.3$  Hz, 2H), 4.84 (d,  $J = 6.6$  Hz, 1H), 4.53 (s, 2H).

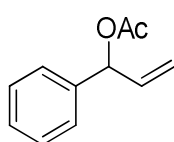

**1-Phenylallyl acetate (7b):** To a solution of 1-phenylprop-2-en-1-ol (268 mg, 2.00 mmol) in dry DCM (6 mL),  $\text{Et}_3\text{N}$  (404 mg, 4.00 mmol) and 4-dimethylaminopyridine (12 mg, 0.10 mmol) were subsequently added. The reaction was then cooled to 0 °C and a solution of  $\text{Ac}_2\text{O}$  (306 mg, 1.50 mmol) in dry DCM (3 mL) was added dropwise through a syringe. After stirring for 20 min the reaction mixture was allowed to warm to room temperature and was stirred overnight. The reaction was quenched by saturated  $\text{NH}_4\text{Cl}$  solution (20 mL). The organic phase was extracted with ethyl acetate (30 mL x 3). The combined organic layers were washed with brine and dried over  $\text{MgSO}_4$ . The solvent was removed in vacuo and the residue was purified by silica gel column chromatography (eluent: PE/EtOAc = 30:1, v/v) to give the desired product **7b** as a colorless liquid (282 mg, 1.60 mmol, 80%). This compound is known and the  $^1\text{H}$  NMR spectra is identical to

that previously reported in the literature.<sup>[5]</sup> <sup>1</sup>H NMR (400 MHz, CDCl<sub>3</sub>) δ 7.40–7.27 (m, 5H), 6.26 (dt, *J* = 5.9, 1.3 Hz, 1H), 6.01 (ddd, *J* = 17.1, 10.4, 5.9 Hz, 1H), 5.27 (ddt, *J* = 14.4, 10.4, 1.3 Hz, 2H), 2.12 (s, 3H).

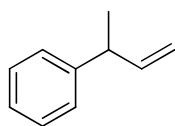

**But-3-en-2-ylbenzene (13):** To a stirred solution of Ph<sub>3</sub>P (2.622 g, 10 mmol) in dry THF (20 mL) was added CH<sub>3</sub>I (622.6 μL, 10 mmol) dropwise through a syringe at room temperature. The solution was stirred in a dark place under nitrogen at room temperature overnight and the solvent was removed in vacuo to form the [Ph<sub>3</sub>P<sup>+</sup>CH<sub>3</sub>]I<sup>−</sup> as a white solid in quantitative yield. The salt [Ph<sub>3</sub>P<sup>+</sup>CH<sub>3</sub>]I<sup>−</sup> was used without further purification. To a stirred solution of [Ph<sub>3</sub>P<sup>+</sup>CH<sub>3</sub>]I<sup>−</sup> (2.021 g, 5 mmol) in dry THF (25 mL) was added NaHMDS (5 mL, 5 mmol, 1 M in THF) dropwise through a syringe at -20°C under nitrogen and the solution was stirred for another 30 min at the same temperature. Then to the solution was added 2-phenylpropanal (656.1 μL, 4.9 mmol) in dry THF (4 mL) dropwise and the resulting solution was stirred at room temperature overnight. Water (20 mL) was added and the mixture was extracted with Et<sub>2</sub>O (30 mL x 3). The combined organic layers were washed with brine (20 mL) and dried over anhydrous Na<sub>2</sub>SO<sub>4</sub>. The solvent was removed in vacuo and the residue was purified by silica gel column chromatography (PE, 30~60 °C) to give the desire product as a colorless liquid (432 mg, 67%). This compound is known and the <sup>1</sup>H NMR spectra is identical to that previously reported in the literature.<sup>[13]</sup> <sup>1</sup>H NMR (400 MHz, CDCl<sub>3</sub>) δ 7.35–7.28 (m, 2H), 7.25–7.18 (m, 3H), 6.02 (ddd, *J* = 16.9, 10.3, 6.5 Hz, 1H), 5.11–5.02 (m, 2H), 3.48 (m, 1H), 1.38 (d, *J* = 7.0 Hz, 3H).

#### 4. Analytic data for aminated prodcuts

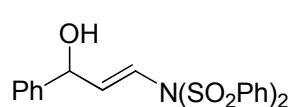

**(E)-N-(3-hydroxy-3-phenylprop-1-en-1-yl)-N-(phenylsulfonyl)benzenesulfonamide(2a):** Prepared by general procedure. Flash silica gel column chromatography (eluent: PE/EtOAc = 10:1 to 5:1, v/v) to afford 2a (74.7 mg, 0.17 mmol, 87 %) as a white solid. <sup>1</sup>H NMR (400 MHz, CDCl<sub>3</sub>) δ

7.88 (d,  $J = 7.9$  Hz, 4H), 7.61 (t,  $J = 7.5$  Hz, 2H), 7.46 (t,  $J = 7.8$  Hz, 4H), 7.35 (dt,  $J = 13.5, 7.3$  Hz, 5H), 6.29 (d,  $J = 13.4$  Hz, 1H), 5.98 (dd,  $J = 13.4, 6.0$  Hz, 1H), 5.29 (d,  $J = 5.9$  Hz, 1H), 2.64 (br, 1H).  $^{13}\text{C}$  NMR (101 MHz,  $\text{CDCl}_3$ )  $\delta$  141.65, 141.17, 139.21, 134.08, 129.16, 128.85, 128.34, 128.23, 126.54, 121.30, 72.51. HR-ESI-MS  $m/z$  calcd.  $\text{C}_{21}\text{H}_{19}\text{NO}_5\text{S}_2$   $[\text{M}+\text{HCOO}]^-$ : 474.0681, found: 474.0690.

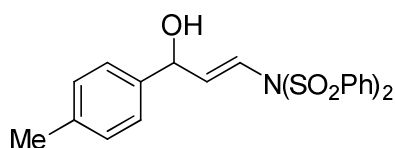

**(E)-N-(3-Hydroxy-3-(*p*-tolyl)prop-1-en-1-yl)-N-(phenylsulfonyl)benzenesulfonamide (2b):** Prepared by general procedure. Flash silica gel column chromatography (eluent: PE/EtOAc = 10:1 to 5:1, v/v)

to afford **2b** (71.8 mg, 0.16 mmol, 81%) as a white solid.  $^1\text{H}$  NMR (400 MHz,  $\text{CDCl}_3$ )  $\delta$  7.96–7.83 (m, 4H), 7.69–7.56 (m, 2H), 7.47 (t,  $J = 7.9$  Hz, 4H), 7.24–7.14 (m, 4H), 6.27 (dd,  $J = 13.4, 1.4$  Hz, 1H), 5.99 (dd,  $J = 13.4, 5.8$  Hz, 1H), 5.26 (d,  $J = 5.5$  Hz, 1H), 2.52 (br, 1H), 2.36 (s, 3H).  $^{13}\text{C}$  NMR (101 MHz,  $\text{CDCl}_3$ )  $\delta$  141.71, 139.32, 138.25, 138.12, 134.05, 129.51, 129.15, 128.25, 126.57, 121.19, 72.38, 21.29. HR-ESI-MS  $m/z$  calcd.  $\text{C}_{22}\text{H}_{21}\text{NO}_5\text{S}_2$   $[\text{M}+\text{HCOO}]^-$ : 488.0838, found: 488.0844.

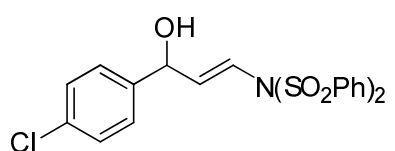

**(E)-N-(3-(4-chlorophenyl)-3-hydroxyprop-1-en-1-yl)-N-(phenylsulfonyl)benzenesulfonamide (2c):**

Prepared by general procedure. Flash silica gel column chromatography (eluent: PE/EtOAc = 10:1 to 5:1, v/v) to afford **2c** (65.8 mg, 0.14 mmol, 71%) as a white solid.  $^1\text{H}$  NMR (400 MHz,  $\text{CDCl}_3$ )  $\delta$  7.86 (d,  $J = 7.8$  Hz, 4H), 7.62 (t,  $J = 7.5$  Hz, 2H), 7.46 (t,  $J = 7.7$  Hz, 4H), 7.32 (d,  $J = 8.2$  Hz, 2H), 7.23 (d,  $J = 8.2$  Hz, 2H), 6.28 (d,  $J = 13.4$  Hz, 1H), 5.93 (dd,  $J = 13.4, 6.2$  Hz, 1H), 5.25 (d,  $J = 6.0$  Hz, 1H), 2.95 (br, 1H).  $^{13}\text{C}$  NMR (101 MHz,  $\text{CDCl}_3$ )  $\delta$  140.96, 139.65, 139.12, 134.20, 134.01, 129.21, 128.95, 128.20, 127.90, 121.70, 71.75. HR-ESI-MS  $m/z$  calcd.  $\text{C}_{21}\text{H}_{18}\text{ClNO}_5\text{S}_2$   $[\text{M}+\text{HCOO}]^-$ : 508.0291, found: 508.0295.

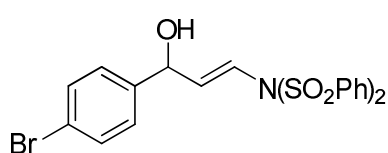

**(E)-N-(3-(4-Bromophenyl)-3-hydroxyprop-1-en-1-yl)-N-(phenylsulfonyl)benzenesulfonamide (2d):**

Prepared by general procedure. Flash silica gel column chromatography (eluent: PE/EtOAc = 10:1 to 5:1, v/v) to afford **2d** (79.1 mg, 0.16 mmol, 78 %) as a white solid.  $^1\text{H}$  NMR (400 MHz,  $\text{CDCl}_3$ )  $\delta$  7.86 (d,  $J$  = 8.0 Hz, 4H), 7.62 (t,  $J$  = 7.4 Hz, 2H), 7.47 (t,  $J$  = 7.5, 6H), 7.17 (d,  $J$  = 8.3 Hz, 2H), 6.28 (d,  $J$  = 13.4 Hz, 1H), 5.92 (dd,  $J$  = 13.4, 6.2 Hz, 1H), 5.24 (d,  $J$  = 6.2 Hz, 1H), 2.59 (br, 1H).  $^{13}\text{C}$  NMR (101 MHz,  $\text{CDCl}_3$ )  $\delta$  140.81, 140.18, 139.13, 134.21, 131.91, 129.22, 128.21, 122.19, 121.74, 71.82. HR-ESI-MS  $m/z$  calcd.  $\text{C}_{21}\text{H}_{18}\text{BrNO}_5\text{S}_2$   $[\text{M}+\text{HCOO}]^-$ : 551.9786, found: 551.9795.

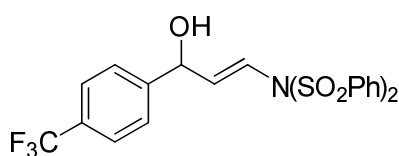

**(E)-N-(3-Hydroxy-3-(4-(trifluoromethyl)phenyl)prop-1-en-1-yl)-N-(phenylsulfonyl)benzenesulfonamide (2e):**

Prepared by general procedure. Flash silica gel column chromatography (eluent: PE/EtOAc = 10:1 to 5:1, v/v) to afford **2e** (62.6 mg, 0.13 mmol, 63%) as a white solid.  $^1\text{H}$  NMR (400 MHz,  $\text{CDCl}_3$ )  $\delta$  7.86 (d,  $J$  = 7.6 Hz, 4H), 7.62 (dd,  $J$  = 7.5, 4.7 Hz, 4H), 7.44 (dd,  $J$  = 16.4, 8.2 Hz, 6H), 6.33 (d,  $J$  = 13.4 Hz, 1H), 5.93 (dd,  $J$  = 13.4, 6.4 Hz, 1H), 5.35 (d,  $J$  = 6.2 Hz, 1H), 2.98 (br, 1H).  $^{13}\text{C}$  NMR (101 MHz,  $\text{CDCl}_3$ )  $\delta$  145.10, 140.13, 139.17, 134.30, 130.43 (q,  $J$  = 32.6 Hz), 129.23, 128.25, 126.75, 125.78 (q,  $J$  = 3.7 Hz), 124.12 (d,  $J$  = 272.1 Hz), 122.23, 71.93. HR-ESI-MS  $m/z$  calcd.  $\text{C}_{22}\text{H}_{18}\text{F}_3\text{NO}_5\text{S}_2$   $[\text{M}+\text{HCOO}]^-$ : 542.0555, found: 542.0559.

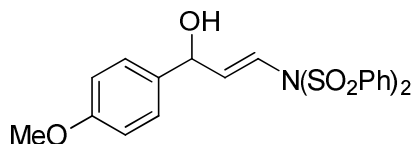

**(E)-N-(3-Hydroxy-3-(4-methoxyphenyl)prop-1-en-1-yl)-N-(phenylsulfonyl)benzenesulfonamide (2f):**

Prepared by general procedure. Flash silica gel column chromatography (eluent: PE/EtOAc = 10:1 to 3:1, v/v) to afford **2f** (66.1 mg, 0.14 mmol, 72%) as a white solid.  $^1\text{H}$  NMR (400 MHz,  $\text{CDCl}_3$ )  $\delta$  7.93 (d,  $J$  = 7.7 Hz, 4H), 7.65 (t,  $J$  = 7.5 Hz, 2H), 7.51 (t,  $J$  = 7.8 Hz, 4H), 7.37–7.21 (m, 2H), 6.92 (d,  $J$  =

8.6 Hz, 2H), 6.30 (d,  $J = 13.4$  Hz, 1H), 6.02 (dd,  $J = 13.3, 5.7$  Hz, 1H), 5.28 (d,  $J = 5.5$  Hz, 1H), 3.84 (s, 3H), 2.45 (br, 1H).  $^{13}\text{C}$  NMR (101 MHz,  $\text{CDCl}_3$ )  $\delta$  159.66, 141.84, 139.36, 134.10, 133.41, 129.19, 128.28, 128.04, 121.15, 114.23, 72.16, 55.48. HR-ESI-MS  $m/z$  calcd.  $\text{C}_{22}\text{H}_{21}\text{NO}_6\text{S}_2$   $[\text{M}-\text{H}]^-$ : 458.0732, found: 458.0739.

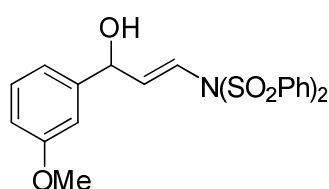

**(E)-N-(3-Hydroxy-3-(3-methoxyphenyl)prop-1-en-1-yl)**

**-N-(phenylsulfonyl)benzenesulfonamide (2g):** Prepared by general procedure. Flash silica gel column chromatography (eluent: PE/EtOAc = 10:1 to 3:1, v/v) to

afford **2g** (66.1 mg, 0.14 mmol, 72%) as a white solid.  $^1\text{H}$  NMR (400 MHz,  $\text{CDCl}_3$ )  $\delta$  8.00–7.77 (m, 4H), 7.72–7.54 (m, 2H), 7.46 (t,  $J = 7.9$  Hz, 4H), 7.36–7.19 (m, 2H), 7.06–6.71 (m, 3H), 6.29 (dd,  $J = 13.4, 1.3$  Hz, 1H), 5.98 (dd,  $J = 13.4, 5.9$  Hz, 1H), 5.42–5.21 (m, 1H), 3.80 (s, 1H), 2.61 (br, 1H).  $^{13}\text{C}$  NMR (101 MHz,  $\text{CDCl}_3$ )  $\delta$  160.04, 142.80, 141.48, 139.28, 134.08, 129.91, 129.17, 128.24, 121.42, 118.81, 114.22, 111.70, 72.44, 55.41. HR-ESI-MS  $m/z$  calcd.  $\text{C}_{22}\text{H}_{21}\text{NO}_6\text{S}_2$   $[\text{M}+\text{HCOO}]^-$ : 504.0787, found: 504.0793.

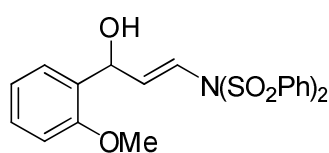

**(E)-N-(3-Hydroxy-3-(2-methoxyphenyl)prop-1-en-1-yl)**

**-N-(phenylsulfonyl)benzenesulfonamide (2h):** Prepared by general procedure. Flash silica gel column

chromatography (eluent: PE/EtOAc = 10:1 to 3:1, v/v) to afford **2h** (65.2 mg, 0.14 mmol, 71%) as a white solid.  $^1\text{H}$  NMR (400 MHz,  $\text{CDCl}_3$ )  $\delta$  7.90 (d,  $J = 8.2$  Hz, 4H), 7.63 (t,  $J = 7.4$  Hz, 2H), 7.49 (t,  $J = 7.6$  Hz, 4H), 7.30 (dd,  $J = 10.3, 5.2$  Hz, 2H), 7.00–6.84 (m, 3H), 6.31 (d,  $J = 13.4$  Hz, 1H), 6.00 (dd,  $J = 13.3, 6.0$  Hz, 1H), 5.29 (d,  $J = 5.9$  Hz, 1H), 3.82 (s, 3H), 2.87 (br, 1H).  $^{13}\text{C}$  NMR (101 MHz,  $\text{CDCl}_3$ )  $\delta$  160.00, 142.79, 141.65, 139.22, 134.09, 129.88, 129.16, 128.22, 121.35, 118.80, 114.17, 111.67, 72.37, 55.39. HR-ESI-MS  $m/z$  calcd.  $\text{C}_{22}\text{H}_{21}\text{NO}_6\text{S}_2$   $[\text{M}+\text{HCOO}]^-$ : 504.0787, found: 504.0782.

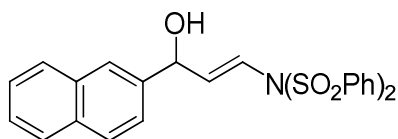

**(E)-N-(3-Hydroxy-3-(naphthalen-2-yl)prop-1-en-1-yl)-N-(phenylsulfonyl)benzenesulfonamide (2i):**

Prepared by general procedure. Flash silica gel column chromatography (eluent: PE/EtOAc = 10:1 to 5:1, v/v) to afford **2i** (70.9 mg, 0.15 mmol, 74 %) as a white solid.  $^1\text{H}$  NMR (400 MHz,  $\text{CDCl}_3$ )  $\delta$  7.94–7.72 (m, 8H), 7.60–7.47 (m, 4H), 7.46–7.29 (m, 5H), 6.36 (dd,  $J$  = 13.4, 0.9 Hz, 1H), 6.07 (dd,  $J$  = 13.4, 6.0 Hz, 1H), 5.45 (d,  $J$  = 5.9 Hz, 1H), 2.93 (s, 1H).  $^{13}\text{C}$  NMR (101 MHz,  $\text{CDCl}_3$ )  $\delta$  141.50, 139.17, 138.59, 134.05, 133.35, 133.20, 129.11, 128.70, 128.19, 127.81, 126.49, 126.41, 125.37, 124.37, 121.44, 72.61. HR-ESI-MS  $m/z$   $\text{C}_{25}\text{H}_{21}\text{NO}_5\text{S}_2$  calcd.  $[\text{M}+\text{HCOO}]^-$ : 524.0838, found: 524.0844.

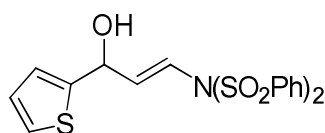

**(E)-N-(3-Hydroxy-3-(thiophen-2-yl)prop-1-en-1-yl)-N-(phenylsulfonyl)benzenesulfonamide (2j):**

Prepared by general procedure. Flash silica gel column chromatography (eluent: PE/EtOAc = 10:1 to 5:1, v/v) to afford **2j** (71.3 mg, 0.16 mmol, 82%) as a red solid.  $^1\text{H}$  NMR (400 MHz,  $\text{CDCl}_3$ )  $\delta$  7.99–7.87 (m, 4H), 7.63 (ddd,  $J$  = 7.0, 4.1, 1.2 Hz, 2H), 7.54–7.45 (m, 4H), 7.32–7.28 (m, 1H), 6.97 (d,  $J$  = 3.5 Hz, 2H), 6.33 (dd,  $J$  = 13.4, 1.3 Hz, 1H), 6.11 (dd,  $J$  = 13.4, 6.0 Hz, 1H), 5.53 (dd,  $J$  = 6.0, 1.1 Hz, 1H), 2.80 (br, 1H).  $^{13}\text{C}$  NMR (101 MHz,  $\text{CDCl}_3$ )  $\delta$  144.96, 140.16, 139.27, 134.15, 129.22, 128.24, 127.07, 125.95, 125.16, 122.11, 68.25. HR-ESI-MS  $m/z$   $\text{C}_{19}\text{H}_{17}\text{NO}_5\text{S}_3$  calcd.  $[\text{M}+\text{HCOO}]^-$ : 480.0251, found: 480.02548.

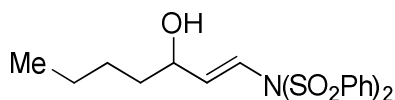

**(E)-N-(3-Hydroxyhept-1-en-1-yl)-N-(phenylsulfonyl)benzenesulfonamide (2k):**

Prepared by general procedure. Flash silica gel column chromatography (eluent: PE/EtOAc = 10:1 to 5:1, v/v) to afford **2k** (64.6 mg, 0.16 mmol, 79%) as a white solid.  $^1\text{H}$  NMR (400 MHz,  $\text{CDCl}_3$ )  $\delta$  7.95 (d,  $J$  = 7.7 Hz, 4H), 7.64 (t,  $J$  = 7.4 Hz, 2H), 7.53 (t,  $J$  = 7.7 Hz, 4H), 6.11 (d,  $J$  = 13.4 Hz, 1H), 5.86 (dd,  $J$  = 13.4, 6.3 Hz, 1H), 4.21 (q,  $J$  = 6.3 Hz, 1H), 2.22 (br, 1H), 1.64–1.41 (m, 2H), 1.39–1.11 (m, 4H), 0.89 (t,  $J$  = 6.7 Hz, 3H).  $^{13}\text{C}$

NMR (101 MHz, CDCl<sub>3</sub>)  $\delta$  143.20, 139.44, 134.12, 129.20, 128.23, 121.13, 70.27, 36.54, 27.24, 22.60, 14.13. HR-ESI-MS  $m/z$  calcd. C<sub>19</sub>H<sub>23</sub>NO<sub>5</sub>S<sub>2</sub> [M+HCOO]<sup>-</sup>: 454.0994, found: 454.1000.

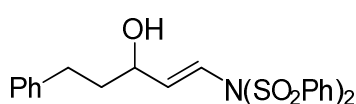

**(E)-N-(3-Hydroxy-5-phenylpent-1-en-1-yl)-N-(phenylsulfonyl)benzenesulfonamide (2l):** Prepared by general procedure. Flash silica gel column chromatography (eluent: PE/EtOAc = 10:1 to 5:1, v/v) to afford **2l** (86.8 mg, 0.19 mmol, 95%) as a white solid. <sup>1</sup>H NMR (400 MHz, CDCl<sub>3</sub>)  $\delta$  7.97 (d,  $J$  = 7.7, 4H), 7.64 (t,  $J$  = 7.5, 2H), 7.53 (t,  $J$  = 7.8 Hz, 4H), 7.30 (t,  $J$  = 7.4 Hz, 2H), 7.20 (dd,  $J$  = 11.4, 7.5 Hz, 3H), 6.15 (d,  $J$  = 13.4 Hz, 1H), 5.92 (dd,  $J$  = 13.4, 6.3 Hz, 1H), 4.24 (q,  $J$  = 6.3 Hz, 1H), 2.78–2.60 (m, 2H), 2.44 (br, 1H), 1.98–1.75 (m, 2H). <sup>13</sup>C NMR (101 MHz, CDCl<sub>3</sub>)  $\delta$  142.87, 141.34, 139.37, 134.16, 129.22, 128.58, 128.51, 128.20, 126.12, 121.51, 69.43, 38.22, 31.27. HR-ESI-MS  $m/z$  calcd. C<sub>23</sub>H<sub>23</sub>NO<sub>5</sub>S<sub>2</sub> [M - H]<sup>-</sup>: 456.0939, found: 456.0949.

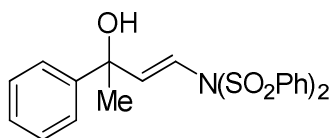

**(E)-N-(3-Hydroxy-3-phenylbut-1-en-1-yl)-N-(phenylsulfonyl)benzenesulfonamide (2m):** Prepared by general procedure. Flash silica gel column chromatography (eluent: PE/EtOAc = 10:1 to 5:1, v/v) to afford **2m** (63.8 mg, 0.14 mmol, 72%) as a white solid. <sup>1</sup>H NMR (400 MHz, CDCl<sub>3</sub>)  $\delta$  7.88 (d,  $J$  = 7.5 Hz, 4H), 7.61 (t,  $J$  = 7.5 Hz, 2H), 7.47 (t,  $J$  = 7.9 Hz, 4H), 7.41 (d,  $J$  = 7.5 Hz, 2H), 7.36 (t,  $J$  = 7.5 Hz, 2H), 7.32–7.27 (m, 1H), 6.24 (d,  $J$  = 13.3 Hz, 1H), 6.09 (d,  $J$  = 13.3 Hz, 1H), 2.47 (s, 1H), 1.67 (s, 3H). <sup>13</sup>C NMR (101 MHz, CDCl<sub>3</sub>)  $\delta$  146.92, 144.97, 139.31, 134.05, 129.15, 128.61, 128.25, 127.70, 125.25, 119.98, 73.89, 29.19. HR-ESI-MS  $m/z$  C<sub>22</sub>H<sub>21</sub>NO<sub>5</sub>S<sub>2</sub> calcd. [M+HCOO]<sup>-</sup>: 488.0838, found: 488.0842.

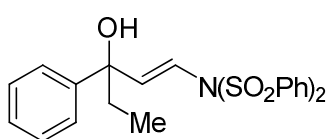

**(E)-N-(3-Hydroxy-3-phenylpent-1-en-1-yl)-N-(phenylsulfonyl)benzenesulfonamide (2n):** Prepared by general procedure. Flash silica gel column chromatography



(eluent: PE/EtOAc = 10:1 to 5:1, v/v) to afford **2n** (61.2 mg, 0.13 mmol, 67%) as a white solid.  $^1\text{H}$  NMR (400 MHz,  $\text{CDCl}_3$ )  $\delta$  7.86 (d,  $J$  = 7.7 Hz, 4H), 7.61 (t,  $J$  = 7.5 Hz, 2H), 7.45 (t,  $J$  = 7.8 Hz, 4H), 7.40 – 7.27 (m, 5H), 6.23 (d,  $J$  = 13.3 Hz, 1H), 6.12 (d,  $J$  = 13.3 Hz, 1H), 2.31 (br, 1H), 1.95 (q,  $J$  = 7.4 Hz, 2H), 0.87 (t,  $J$  = 7.4 Hz, 3H).  $^{13}\text{C}$  NMR (101 MHz,  $\text{CDCl}_3$ )  $\delta$  146.47, 144.22, 139.32, 133.99, 129.14, 128.54, 128.19, 127.49, 125.49, 120.39, 76.65, 34.68, 7.93. HR-ESI-MS  $m/z$  calcd.  $\text{C}_{23}\text{H}_{23}\text{NO}_5\text{S}_2$   $[\text{M}+\text{HCOO}]^-$ : 502.0994, found: 502.0996.

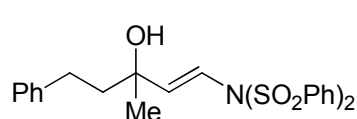

**(E)-N-(3-Hydroxy-3-methyl-5-phenylpent-1-en-1-yl)-**

**N-(phenylsulfonyl)benzenesulfonamide (2o)**: Prepared by general procedure. Flash silica gel column chromatography (eluent: PE/EtOAc = 10:1 to 5:1, v/v) to afford **2o** (73.5 mg, 0.16 mmol, 78%) as a white solid.  $^1\text{H}$  NMR (400 MHz,  $\text{CDCl}_3$ )  $\delta$  7.99 (d,  $J$  = 7.9 Hz, 4H), 7.69 – 7.59 (m, 2H), 7.53 (t,  $J$  = 7.8 Hz, 4H), 7.29 (dd,  $J$  = 12.7, 5.4 Hz, 2H), 7.19 (t,  $J$  = 8.4 Hz, 3H), 6.20 (d,  $J$  = 13.3 Hz, 1H), 5.96 (d,  $J$  = 13.3 Hz, 1H), 2.66 (pd,  $J$  = 13.5, 6.4 Hz, 2H), 2.33 (br, 1H), 1.93–1.75 (m, 2H), 1.36 (s, 3H).  $^{13}\text{C}$  NMR (101 MHz,  $\text{CDCl}_3$ )  $\delta$  147.59, 141.92, 139.40, 134.08, 129.19, 128.56, 128.40, 128.17, 126.00, 120.05, 72.76, 44.14, 30.22, 28.32. HR-ESI-MS  $m/z$  calcd.  $\text{C}_{24}\text{H}_{25}\text{NO}_5\text{S}_2$   $[\text{M}-\text{H}]^-$ : 470.1096, found: 470.1104.

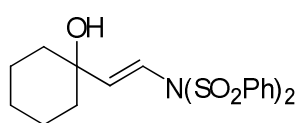

**(E)-N-(2-(1-Hydroxycyclohexyl)vinyl)-N-(phenylsulfonyl)**

**benzenesulfonamide (2p)**: Prepared by general procedure. Flash silica gel column chromatography (eluent: PE/EtOAc = 10:1 to 5:1, v/v) to afford **2p** (70.7 mg, 0.17 mmol, 84%) as a white solid.  $^1\text{H}$  NMR (400 MHz,  $\text{CDCl}_3$ )  $\delta$  7.93 (d,  $J$  = 7.5 Hz, 4H), 7.64 (t,  $J$  = 7.4 Hz, 2H), 7.53 (t,  $J$  = 7.8 Hz, 4H), 6.14 (d,  $J$  = 13.3 Hz, 1H), 5.93 (d,  $J$  = 13.3 Hz, 1H), 1.96 (br, 1H), 1.70–1.38 (m, 8H), 1.35–1.13 (m, 2H).  $^{13}\text{C}$  NMR (101 MHz,  $\text{CDCl}_3$ )  $\delta$  148.19, 139.44, 134.05, 129.15, 128.26, 119.72, 71.43, 37.50, 25.26, 21.69. HR-ESI-MS  $m/z$   $\text{C}_{20}\text{H}_{23}\text{NO}_5\text{S}_2$  calcd.  $[\text{M} + \text{COO}]^-$ : 466.0994, found: 466.0993.

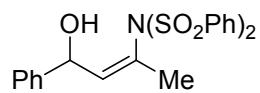

**(Z)-N-(4-Hydroxy-4-phenylbut-2-en-2-yl)-N-(phenylsulfonyl)benzenesulfonamide (5a)**

**enzenesulfonamide (5a)**: Prepared by a modified general procedure. To a 5-mL glass vial was subsequently PhSeSePh (3.1 mg, 0.01 mmol, 5 mol%), NFSI (63.1 mg, 0.20 mmol), dry THF (1 mL) and **4a** (29.6 mg, 0.20 mmol,). The resulting solution was stirred at room temperature for 12 h. The solvent was removed in vacuo and the residue was purified by silica gel column chromatography (eluent: PE/EtOAc = 15:1 to 9:1, v/v) to give **5a** (71.8 mg, 0.16 mmol, 81%) as a white solid.  $^1\text{H}$  NMR (400 MHz,  $\text{CDCl}_3$ )  $\delta$  8.08 (d,  $J$  = 8.0 Hz, 2H), 8.00 (d,  $J$  = 8.1 Hz, 2H), 7.71 (t,  $J$  = 7.5 Hz, 1H), 7.58 (dd,  $J$  = 15.5, 7.8 Hz, 3H), 7.45–7.23 (m, 8H), 6.05 (d,  $J$  = 9.9 Hz, 1H), 5.09 (dd,  $J$  = 9.9, 2.2 Hz, 1H), 2.98 (br,  $J$  = 2.5 Hz, 1H), 1.83 (s, 3H).  $^{13}\text{C}$  NMR (101 MHz,  $\text{CDCl}_3$ )  $\delta$  140.71, 139.25, 139.18, 134.58, 134.28, 131.66, 129.37, 129.12, 128.94, 128.86, 128.38, 127.77, 126.49, 68.46, 22.98. HR-ESI-MS  $m/z$  calcd.  $\text{C}_{22}\text{H}_{21}\text{NO}_5\text{S}_2$   $[\text{M}+\text{Cl}]^-$ : 478.0550, found: 478.0560.

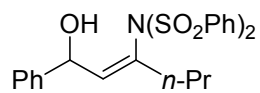

**(Z)-N-(1-Hydroxy-1-phenylhex-2-en-3-yl)-N-(phenylsulfonyl)benzenesulfonamide (5b)**

**enzenesulfonamide (5b)**: Prepared by a procedure similar to synthesis of **5a**. Silica gel column chromatography (eluent: PE/EtOAc = 15:1 to 12:1, v/v) to give **5b** (66.9 mg, 0.14 mmol, 71%) as a white solid.  $^1\text{H}$  NMR (400 MHz,  $\text{CDCl}_3$ )  $\delta$  8.10–8.03 (m, 2H), 7.97 (dd,  $J$  = 8.5, 1.1 Hz, 2H), 7.71 (t,  $J$  = 7.5 Hz, 1H), 7.64–7.48 (m, 3H), 7.41–7.21 (m, 8H), 6.03 (dt,  $J$  = 9.8, 1.4 Hz, 1H), 5.13 (dd,  $J$  = 9.8, 2.4 Hz, 1H), 2.98 (br, 1H), 2.54–1.98 (m, 1H), 1.84–1.69 (m, 1H), 1.65–1.38 (m, 2H), 0.83 (t,  $J$  = 7.3 Hz, 3H).  $^{13}\text{C}$  NMR (101 MHz,  $\text{CDCl}_3$ )  $\delta$  140.88, 139.30, 139.19, 136.92, 136.18, 134.56, 134.24, 129.32, 129.06, 129.03, 128.94, 128.38, 127.74, 126.51, 68.26, 37.87, 20.67, 13.62. HR-ESI-MS  $m/z$  calcd.  $\text{C}_{24}\text{H}_{25}\text{NO}_5\text{S}_2$   $[\text{M}+\text{Cl}]^-$ : 506.0863, found: 506.0868.

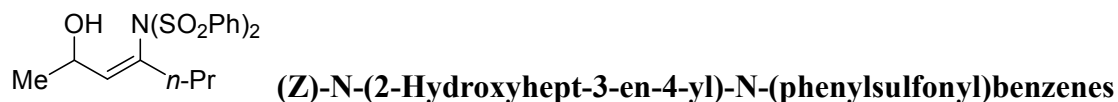

Prepared by a procedure similar to synthesis of **5a**. Silica gel column chromatography (eluent: PE/EtOAc = 15:1 to 12:1, v/v) to give **5c** (62.2 mg, 0.15 mmol, 76%) as white solid. A single crystal suitable for X-ray diffraction was achieved by slow evaporation of a solution of **5c** in mixed solvents of dichloromethane and hexanes. <sup>1</sup>H NMR (400 MHz, CDCl<sub>3</sub>) δ 8.15–7.98 (m, 4H), 7.69 (td, *J* = 7.3, 1.6 Hz, 2H), 7.64–7.52 (m, 4H), 5.65 (d, *J* = 9.7 Hz, 1H), 3.86 (dq, *J* = 12.1, 6.1, 2.0 Hz, 1H), 2.38 (br, 1H), 2.33–2.21 (m, 1H), 2.01–1.88 (m, 1H), 1.58–1.40 (m, 2H), 0.88 (m, 6H). <sup>13</sup>C NMR (101 MHz, CDCl<sub>3</sub>) δ 139.76, 139.21, 138.92, 134.45, 134.39, 134.36, 129.26, 129.22, 129.05, 128.84, 63.23, 38.04, 21.16, 20.73, 13.61. HR-ESI-MS *m/z* calcd. C<sub>19</sub>H<sub>23</sub>NO<sub>5</sub>S<sub>2</sub> [M+Na]<sup>+</sup>: 432.0915, found: 432.0914.

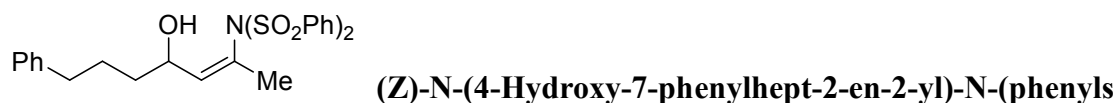

Prepared by a procedure similar to synthesis of **5a**. Silica gel column chromatography (eluent: PE/EtOAc = 15:1 to 12:1, v/v) to give **5d** (89.4 mg, 0.18 mmol, 92%) as a white solid. <sup>1</sup>H NMR (400 MHz, CDCl<sub>3</sub>) δ 8.13–7.94 (m, 4H), 7.68 (t, *J* = 7.5 Hz, 1H), 7.59 (dt, *J* = 15.3, 7.5 Hz, 3H), 7.45 (dd, *J* = 10.8, 5.0 Hz, 2H), 7.32 (dd, *J* = 10.2, 4.5 Hz, 2H), 7.24–7.15 (m, 3H), 5.73 (dd, *J* = 9.8, 1.0 Hz, 1H), 3.67 (t, *J* = 9.3 Hz, 1H), 2.63–2.44 (m, 3H), 1.87 (d, *J* = 1.0 Hz, 3H), 1.79–1.65 (m, 1H), 1.45–1.26 (m, 1H), 1.22–1.01 (m, 2H). <sup>13</sup>C NMR (101 MHz, CDCl<sub>3</sub>) δ 142.42, 140.35, 139.67, 138.89, 134.38, 134.29, 130.41, 129.27, 129.15, 128.80, 128.66, 128.57, 128.35, 125.84, 66.94, 35.95, 35.15, 27.24, 23.12. HR-ESI-MS *m/z* calcd. C<sub>25</sub>H<sub>27</sub>NO<sub>5</sub>S<sub>2</sub> [M+Na]<sup>+</sup>: 508.1228, found: 508.1223.

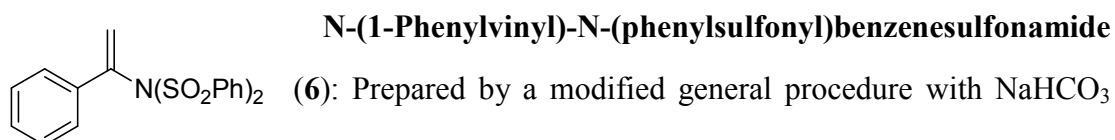

(20.2 mg, 0.24 mmol) as the base. The residue was purified by silica gel column chromatography (eluent: PE/EA = 15:1, v/v) to give the desire product **6** as a pale solid (79.9 mg, 72%).  $^1\text{H}$  NMR (400 MHz,  $\text{CDCl}_3$ )  $\delta$  8.02–7.91 (m, 4H), 7.63 (t,  $J$  = 7.5 Hz, 2H), 7.49 (t,  $J$  = 7.9, 4H), 7.40 (d,  $J$  = 7.3 Hz, 2H), 7.31–7.26 (m, 1H), 7.21 (dd,  $J$  = 10.1, 4.6 Hz, 2H), 5.91 (d,  $J$  = 0.9 Hz, 1H), 5.06 (d,  $J$  = 0.9 Hz, 1H).  $^{13}\text{C}$  NMR (101 MHz,  $\text{CDCl}_3$ )  $\delta$  142.05, 139.35, 135.33, 134.11, 129.18, 129.16, 128.90, 128.39, 127.15, 120.30. HR-ESI-MS  $m/z$  calcd.  $\text{C}_{20}\text{H}_{17}\text{NO}_4\text{S}_2$   $[\text{M}+\text{NH}_4]^+$ : 417.0943, found: 417.0916.

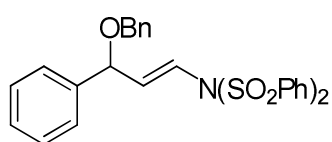

**(E)-N-(3-(Benzyloxy)-3-phenylprop-1-en-1-yl)-N-(phenylsulfonyl)benzenesulfonamide (8a):** Prepared by general procedure. Purified by flash silica gel column

chromatography (eluent: PE/EA = 10:1, v/v) to afford the corresponding product **8a** (60.2 mg, 0.12 mmol, 58%) as a white solid.  $^1\text{H}$  NMR (400 MHz,  $\text{CDCl}_3$ )  $\delta$  7.89 (d,  $J$  = 7.9 Hz, 4H), 7.62 (t,  $J$  = 7.5 Hz, 2H), 7.47 (t,  $J$  = 7.9 Hz, 4H), 7.44–7.28 (m, 10H), 6.27 (d,  $J$  = 13.4 Hz, 1H), 5.96 (dd,  $J$  = 13.5, 6.7 Hz, 1H), 4.94 (d,  $J$  = 6.7 Hz, 1H), 4.60–4.48 (m, 2H).  $^{13}\text{C}$  NMR (101 MHz,  $\text{CDCl}_3$ )  $\delta$  140.17, 139.48, 139.32, 137.89, 134.06, 129.15, 128.80, 128.56, 128.32, 128.27, 127.86, 127.84, 127.09, 122.17, 78.47, 70.32. HR-ESI-MS  $m/z$  calcd.  $\text{C}_{28}\text{H}_{25}\text{NO}_5\text{S}_2$   $[\text{M}+\text{Na}]^+$ : 542.1072, found: 542.1064.

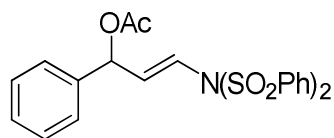

**(E)-1-Phenyl-3-(N-(phenylsulfonyl)phenylsulfonamido)allyl acetate (8b):** Prepared by general procedure. Purified by flash silica gel column chromatography

(eluent: PE/EA = 10:1, v/v) to afford the corresponding product **8b** (36.6 mg, 0.08 mmol, 39%) as a white solid.  $^1\text{H}$  NMR (400 MHz,  $\text{CDCl}_3$ )  $\delta$  7.90 (dd,  $J$  = 8.5, 1.2 Hz, 4H), 7.67–7.59 (m, 2H), 7.54–7.46 (m, 4H), 7.42–7.30 (m, 5H), 6.31 (d,  $J$  = 6.4 Hz, 1H), 6.26 (dd,  $J$  = 13.5, 1.2 Hz, 1H), 6.01 (dd,  $J$  = 13.5, 6.5 Hz, 1H), 2.11 (s, 3H).  $^{13}\text{C}$  NMR (101 MHz,  $\text{CDCl}_3$ )  $\delta$  169.74, 139.26, 137.72, 136.75, 134.15, 129.18, 128.91,

128.81, 128.31, 127.30, 123.09, 73.41, 21.24. HR-ESI-MS  $m/z$  calcd.  $C_{23}H_{21}NO_6S_2$   $[M+Na]^+$ : 494.0708, found: 494.0703.

## 5. Analytic data for $\alpha,\beta$ -unsaturated aldehydes

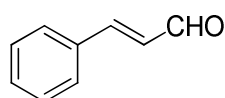

**(E)-Cinnamaldehyde (3a)**: Prepared by general procedure. Flash silica gel column chromatography (eluent: PE/EtOAc = 30:1, v/v) to **3a** (24.3 mg, 0.18 mmol, 92%) as a yellow oil. This compound is known, and the  $^1H$  and  $^{13}C\{^1H\}$  NMR spectra are identical to those previously reported in the literature.<sup>[14]</sup>  $^1H$  NMR (400 MHz,  $CDCl_3$ )  $\delta$  9.71 (d,  $J$  = 7.7 Hz, 1H), 7.61–7.54 (m, 2H), 7.52–7.40 (m, 4H), 6.73 (dd,  $J$  = 16.0, 7.7 Hz, 1H).  $^{13}C$  NMR (101 MHz,  $CDCl_3$ )  $\delta$  193.87, 152.95, 134.13, 131.42, 129.25, 128.74, 128.63.

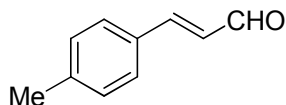

**(E)-3-(p-Tolyl)acrylaldehyde (3b)**: Prepared by general procedure. Flash silica gel column chromatography (eluent: PE/EtOAc = 30:1, v/v) to afford **3b** (28.3 mg, 0.19 mmol, 97%) as a white solid. This compound is known, and the  $^1H$  and  $^{13}C\{^1H\}$  NMR spectra are identical to those previously reported in the literature.<sup>[14]</sup>  $^1H$  NMR (400 MHz,  $CDCl_3$ )  $\delta$  9.68 (d,  $J$  = 7.7 Hz, 1H), 7.45 (dd,  $J$  = 12.1, 5.9 Hz, 3H), 7.23 (d,  $J$  = 8.0 Hz, 2H), 6.68 (dd,  $J$  = 15.9, 7.7 Hz, 1H), 2.39 (s, 3H).  $^{13}C$  NMR (101 MHz,  $CDCl_3$ )  $\delta$  193.94, 153.10, 142.10, 131.43, 129.96, 128.65, 127.82, 21.69.

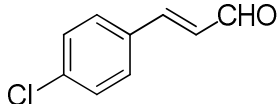

**(E)-3-(4-Chlorophenyl)acrylaldehyde (3c)**: Prepared by general procedure. Flash silica gel column chromatography (eluent: PE/EtOAc = 30:1, v/v) to afford **3c** (27.8 mg, 0.17 mmol, 84%) as a white solid. This compound is known, and the  $^1H$  and  $^{13}C\{^1H\}$  NMR spectra are identical to those previously reported in the literature.<sup>[15]</sup>  $^1H$  NMR (400 MHz,  $CDCl_3$ )  $\delta$  9.70 (d,  $J$  = 7.6 Hz, 1H), 7.54–7.47 (m, 2H), 7.46–7.38 (m, 3H),

6.68 (dd,  $J = 16.0, 7.6$  Hz, 1H).  $^{13}\text{C}$  NMR (101 MHz,  $\text{CDCl}_3$ )  $\delta$  193.52, 151.19, 137.42, 132.62, 129.75, 129.58, 129.09.

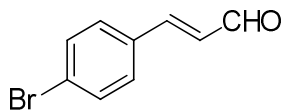

**(E)-3-(4-Bromophenyl)acrylaldehyde (3d):** Prepared by general procedure.

Flash silica gel column chromatography (eluent: PE/EtOAc = 30:1, v/v) to afford **3d** (34.9 mg, 0.17 mmol, 83%) as a white solid. This compound is known, and the  $^1\text{H}$  and  $^{13}\text{C}\{^1\text{H}\}$  NMR spectra are identical to those previously reported in the literature.<sup>[16]</sup>  $^1\text{H}$  NMR (400 MHz,  $\text{CDCl}_3$ )  $\delta$  9.70 (d,  $J = 7.6$  Hz, 1H), 7.65–7.51 (m, 2H), 7.42 (dd,  $J = 12.2, 5.3$  Hz, 3H), 6.70 (dd,  $J = 16.0, 7.6$  Hz, 1H).  $^{13}\text{C}$  NMR (101 MHz,  $\text{CDCl}_3$ )  $\delta$  193.48, 151.22, 133.02, 132.53, 129.91, 129.15, 125.82.

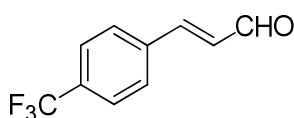

**(E)-3-(4-(Trifluoromethyl)phenyl)acrylaldehyde (3e):**

Prepared by general procedure. Flash silica gel column chromatography (eluent: PE/EtOAc = 30:1, v/v) to afford **3e** (32.8 mg, 0.16 mmol, 82%) as a white solid. This compound is known, and the  $^1\text{H}$  and  $^{13}\text{C}\{^1\text{H}\}$  NMR spectra are identical to those previously reported in the literature.<sup>[17]</sup>  $^1\text{H}$  NMR (400 MHz,  $\text{CDCl}_3$ )  $\delta$  9.75 (d,  $J = 7.6$  Hz, 1H), 7.76 – 7.59 (m, 4H), 7.51 (d,  $J = 16.0$  Hz, 1H), 6.78 (dd,  $J = 16.0, 7.5$  Hz, 1H).  $^{13}\text{C}$  NMR (101 MHz,  $\text{CDCl}_3$ )  $\delta$  193.35, 150.45, 137.43, 130.76 (q,  $J = 32.6$  Hz), 130.65, 128.72, 126.22 (q,  $J = 3.7$  Hz), 123.81 (d,  $J = 272.5$  Hz).

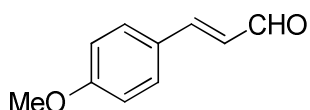

**(E)-3-(4-Methoxyphenyl)acrylaldehyde (3f):** Prepared by general procedure. Silica gel column chromatography

(eluent: PE/EtOAc = 12:1, v/v) to afford **3f** (13.9 mg, 0.86 mmol, 43%) as a white solid. This compound is known, and the  $^1\text{H}$  and  $^{13}\text{C}\{^1\text{H}\}$  NMR spectra are identical to those previously reported in the literature.<sup>[14]</sup>  $^1\text{H}$  NMR (400 MHz,  $\text{CDCl}_3$ )  $\delta$  9.65 (d,  $J = 7.8$  Hz, 1H), 7.53 (d,  $J = 8.8$  Hz, 2H), 7.43 (d,  $J =$

15.8 Hz, 1H), 6.93 (dd,  $J = 13.1, 10.4$  Hz, 2H), 6.62 (dd,  $J = 15.8, 7.8$  Hz, 1H), 3.86 (s, 3H).  $^{13}\text{C}$  NMR (101 MHz,  $\text{CDCl}_3$ )  $\delta$  193.86, 162.34, 152.86, 130.50, 126.67, 114.71, 55.61.

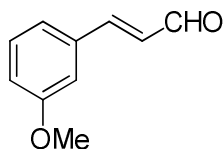

**(E)-3-(3-Methoxyphenyl)acrylaldehyde (3g):** Prepared by general procedure. Flash silica gel column chromatography (eluent: PE/EtOAc = 30:1 to 20:1, v/v) to afford **3g** (30.1 mg, 0.19 mmol, 93%) as a white solid. This compound is known, and the  $^1\text{H}$  and  $^{13}\text{C}\{^1\text{H}\}$  NMR spectra are identical to those previously reported in the literature.<sup>[15]</sup>  $^1\text{H}$  NMR (400 MHz,  $\text{CDCl}_3$ )  $\delta$  9.70 (d,  $J = 7.7$  Hz, 1H), 7.45 (d,  $J = 15.9$  Hz, 1H), 7.35 (t,  $J = 7.9$  Hz, 1H), 7.16 (d,  $J = 7.6$  Hz, 1H), 7.11–7.05 (m, 1H), 6.99 (ddd,  $J = 8.2, 2.5, 0.7$  Hz, 1H), 6.70 (dd,  $J = 15.9, 7.7$  Hz, 1H), 3.84 (s, 3H).  $^{13}\text{C}$  NMR (101 MHz,  $\text{CDCl}_3$ )  $\delta$  193.80, 160.13, 152.80, 135.47, 130.24, 128.97, 121.34, 117.22, 113.41, 55.49.

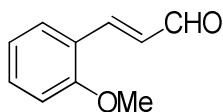

**(E)-3-(2-Methoxyphenyl)acrylaldehyde (3h):** Prepared by general procedure. Flash silica gel column chromatography (eluent: PE/EtOAc = 30:1 to 20:1, v/v) to afford **3h** (31.0 mg, 0.19 mmol, 96%) as a white solid. This compound is known, and the  $^1\text{H}$  and  $^{13}\text{C}\{^1\text{H}\}$  NMR spectra are identical to those previously reported in the literature.<sup>[15]</sup>  $^1\text{H}$  NMR (400 MHz,  $\text{CDCl}_3$ )  $\delta$  9.68 (d,  $J = 7.9$  Hz, 1H), 7.84 (d,  $J = 16.1$  Hz, 1H), 7.55 (dd,  $J = 7.7, 1.6$  Hz, 1H), 7.46–7.37 (m, 1H), 7.07–6.92 (m, 2H), 6.79 (dd,  $J = 16.1, 7.9$  Hz, 1H), 3.91 (s, 3H).  $^{13}\text{C}$  NMR (101 MHz,  $\text{CDCl}_3$ )  $\delta$  194.71, 158.40, 148.35, 132.81, 129.19, 128.99, 123.08, 120.99, 111.40, 55.69.

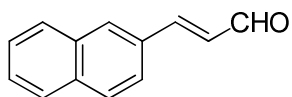

**(E)-3-(Naphthalen-2-yl)acrylaldehyde (3i):** Prepared by general procedure. Flash silica gel column chromatography (eluent: PE/EtOAc = 30:1, v/v) to afford **3i** (33.9 mg, 0.18 mmol, 93%) as a white solid. This compound is known, and the  $^1\text{H}$  and  $^{13}\text{C}\{^1\text{H}\}$  NMR spectra are identical to those previously reported in the literature.<sup>[14]</sup>  $^1\text{H}$  NMR

(400 MHz, CDCl<sub>3</sub>)  $\delta$  9.76 (d,  $J$  = 7.7 Hz, 1H), 7.98 (s, 1H), 7.87 (dd,  $J$  = 15.2, 6.6 Hz, 3H), 7.59 (dddd,  $J$  = 14.7, 8.5, 7.9, 3.4 Hz, 4H), 6.83 (dd,  $J$  = 15.9, 7.7 Hz, 1H). <sup>13</sup>C NMR (101 MHz, CDCl<sub>3</sub>)  $\delta$  193.81, 152.90, 134.75, 133.30, 131.66, 130.82, 129.09, 128.88, 128.81, 127.99, 127.94, 127.08, 123.64.

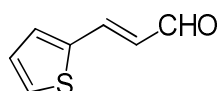

**(E)-3-(Thiophen-2-yl)acrylaldehyde (3j):** Prepared by general procedure. Flash silica gel column chromatography (eluent: PE/EtOAc = 20:1, v/v) to afford **3j** (19.3 mg, 0.14 mmol, 70%) as an orange oil. This compound is known, and the <sup>1</sup>H and <sup>13</sup>C{<sup>1</sup>H} NMR spectra are identical to those previously reported in the literature.<sup>[14]</sup> <sup>1</sup>H NMR (400 MHz, CDCl<sub>3</sub>)  $\delta$  9.63 (d,  $J$  = 7.7 Hz, 1H), 7.59 (d,  $J$  = 15.6 Hz, 1H), 7.50 (d,  $J$  = 5.1 Hz, 1H), 7.36 (d,  $J$  = 3.6 Hz, 1H), 7.11 (dd,  $J$  = 5.0, 3.7 Hz, 1H), 6.52 (dd,  $J$  = 15.6, 7.7 Hz, 1H). <sup>13</sup>C NMR (101 MHz, CDCl<sub>3</sub>)  $\delta$  193.03, 144.55, 139.42, 132.20, 130.53, 128.66, 127.52.

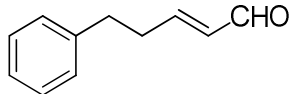

**(E)-5-Phenylpent-2-enal (3k):** Prepared by general procedure but the reaction was carried out at 60 °C. The residue was directly purified by flash silica gel column chromatography (eluent: PE/EtOAc = 30:1, v/v) to afford **3k** (22.8 mg, 0.14 mmol, 71%) as a colorless oil. This compound is known, and the <sup>1</sup>H and <sup>13</sup>C{<sup>1</sup>H} NMR spectra are identical to those previously reported in the literature.<sup>[18]</sup> <sup>1</sup>H NMR (400 MHz, CDCl<sub>3</sub>)  $\delta$  9.50 (d,  $J$  = 7.9 Hz, 1H), 7.32 (dd,  $J$  = 10.1, 4.5 Hz, 2H), 7.25–7.17 (m, 3H), 6.86 (dt,  $J$  = 15.6, 6.7 Hz, 1H), 6.14 (ddt,  $J$  = 15.6, 7.9, 1.4 Hz, 1H), 2.84 (t,  $J$  = 7.6 Hz, 2H), 2.74–2.62 (m, 2H). <sup>13</sup>C NMR (101 MHz, CDCl<sub>3</sub>)  $\delta$  194.10, 157.45, 140.39, 133.52, 128.72, 128.45, 126.51, 34.36, 34.20.

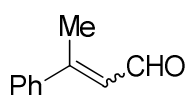

**3-Phenylbut-2-enal (3l):** Prepared by general procedure. Flash silica gel column chromatography (eluent: PE/EtOAc = 30:1, v/v) to afford the isomers **3l** (19.3 mg, 0.12 mmol, 66%, Z/E = 1 : 5 ) as a white solid. They are known, and the <sup>1</sup>H and <sup>13</sup>C{<sup>1</sup>H} NMR spectra are identical to those previously



reported in the literature.<sup>[19]</sup> <sup>1</sup>H NMR (400 MHz, CDCl<sub>3</sub>) δ 10.18 (d, *J* = 7.9 Hz, 1H), 9.47 (d, *J* = 8.2 Hz, 1H), 7.61–7.28 (m, 5H), 6.40 (ddd, *J* = 7.9, 2.4, 1.2 Hz, 1H), 6.14 (dd, *J* = 8.2, 1.3 Hz, 1H), 2.58 (d, *J* = 1.2 Hz, 3H), 2.32 (d, *J* = 1.4 Hz, 3H). <sup>13</sup>C NMR (101 MHz, CDCl<sub>3</sub>) δ 193.63, 191.43, 157.81, 140.69, 130.23, 129.30, 128.89, 128.57, 128.49, 127.41, 126.40, 26.59, 16.53.

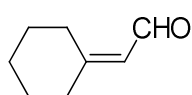

**2-Cyclohexylideneacetaldehyde (3m):** Prepared by general procedure but the reaction was carried out at 60 °C. The residue was directly purified by flash silica gel column chromatography (eluent: PE/EtOAc = 30:1, v/v) to afford **3m** (15.1 mg, 0.12 mmol, 61%) as a colorless oil. This compound is known, and the <sup>1</sup>H and <sup>13</sup>C{<sup>1</sup>H} NMR spectra are identical to those previously reported in the literature.<sup>[18]</sup> <sup>1</sup>H NMR (400 MHz, CDCl<sub>3</sub>) δ 10.01 (d, *J* = 8.3 Hz, 1H), 5.82 (d, *J* = 8.3 Hz, 1H), 2.74–2.67 (m, 2H), 2.32–2.26 (m, 2H), 1.80–1.55 (m, 6H). <sup>13</sup>C NMR (101 MHz, CDCl<sub>3</sub>) δ 190.74, 168.28, 125.43, 38.22, 29.76, 28.56, 28.32, 26.31.

## 6. Experimental details for amination of the alkenes 9, 13 and 14

### 1) Amination of Allylbenzene 9

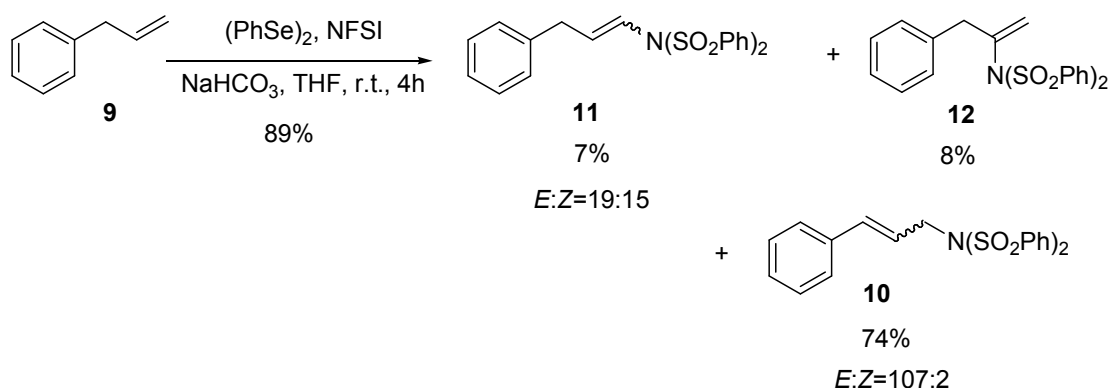

A 5-mL glass vial was charged with a magnetic stir bar, PhSeSePh (3.1 mg, 0.01 mmol), NFSI (63.1 mg, 0.20 mmol) and NaHCO<sub>3</sub> (20.2 mg, 0.24 mmol). Then allylbenzene **9** (23.6 mg, 0.20 mmol) was added. The vial was capped. The resulting mixture was stirred at room temperature for 4 h. The solvent was removed in vacuo

and the residue was purified by silica gel column chromatography (eluent, PE/EA = 9:1, v/v) to give pale oil mixture of isomers **10**, **11**, **12**. It was difficult to separate the isomers **10**, **11** and **12** because of their similar polarity. Yields of the isomers were determined by proton NMR using benzyl benzoate (44.0 mg, 0.2073 mmol) as the internal standard. The total yield is 89%.

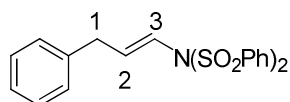

*i1*

$^1\text{H NMR}$  (400 MHz,  $\text{CDCl}_3$ )  $\delta$  3.22 (d,  $J = 6.8$  Hz, **H1**, 2H).

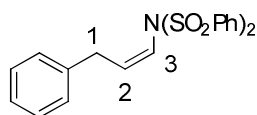

*i2*

$^1\text{H NMR}$  (400 MHz,  $\text{CDCl}_3$ )  $\delta$  3.43 (d,  $J = 5.7$  Hz, **H1**, 2H).

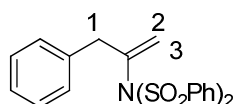

*i3*

$^1\text{H NMR}$  (400 MHz,  $\text{CDCl}_3$ )  $\delta$  4.98 (s, **H2**, 1H), 4.80 (s, **H3**, 1H), 3.59 (s, **H1**, 2H).

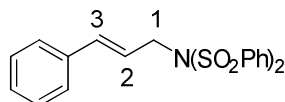

*i4*

$^1\text{H NMR}$  (400 MHz,  $\text{CDCl}_3$ )  $\delta$  6.59 (d,  $J = 15.9$  Hz, **H3**, 1H), 6.07 (dt,  $J = 15.8$ , 6.7 Hz, **H2**, 1H), 4.50 (d,  $J = 6.6$  Hz, **H1**, 2H).  $^1\text{H NMR}$  signals were consistent with literature.<sup>[20]</sup>

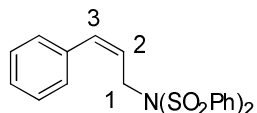

*i5*

$^1\text{H NMR}$  (400 MHz,  $\text{CDCl}_3$ )  $\delta$  4.68 (d,  $J = 6.2$  Hz, **H1**, 1H).

## 2) Amination of 3-Phenyl-1-butene **13**

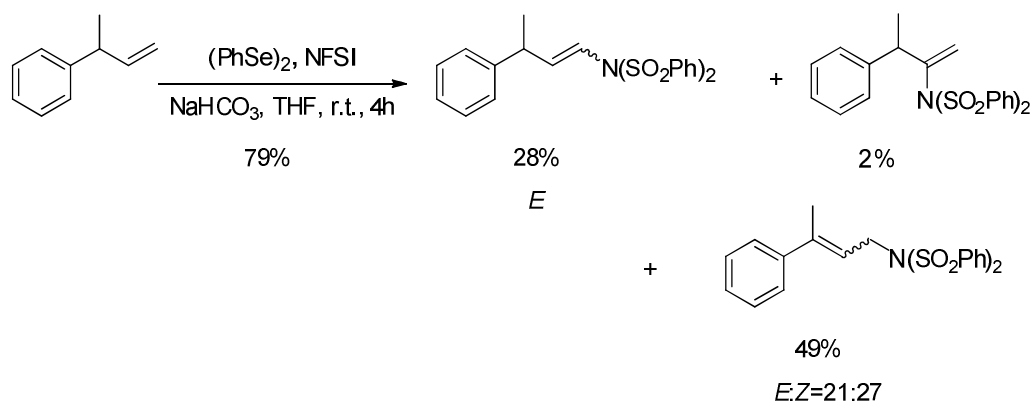

A 5-mL glass vial was charged with a magnetic stir bar,  $\text{PhSeSePh}$  (3.1 mg, 0.01 mmol), NFSI (63.1 mg, 0.20 mmol) and  $\text{NaHCO}_3$  (20.2 mg, 0.24 mmol). Then 3-phenyl-1-butene **13** (26.4 mg, 0.20 mmol, 1.0 equiv) was added. The vial was capped. The resulting mixture was stirred at room temperature for 4 h. The solvent was removed in vacuo and the residue was purified by silica gel column chromatography (eluent: PE/EA = 9:1, v/v) to give pale oil mixture of isomers. It was difficult to separate these isomers because of their similar polarity. Yields of the isomers were determined by proton NMR using benzyl benzoate (43.5 mg, 0.2050 mmol) as the internal standard. The total yield is 79%.

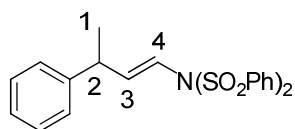

*i1*

$^1\text{H NMR}$  (400 MHz,  $\text{CDCl}_3$ )  $\delta$  5.98 – 5.87 (m, **H3**, **H4**, 2H), 3.62 – 3.52 (m, **H2**, 1H), 1.38 (d,  $J = 7.0$  Hz, **H1**, 3H).

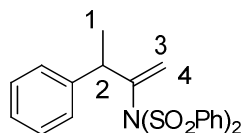

*i2*

$^1\text{H NMR}$  (400 MHz,  $\text{CDCl}_3$ )  $\delta$  5.46 (s, **H3**, 1H), 4.86 (s, **H4**, 1H).

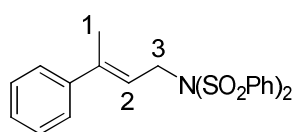

*i3*

$^1\text{H}$  NMR (400 MHz,  $\text{CDCl}_3$ )  $\delta$  5.66 (td,  $J = 6.9, 1.1$  Hz, **H2**, 1H), 4.58 (d,  $J = 6.9$  Hz, **H3**, 2H), 2.12 (s, **H1**, 3H).

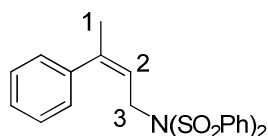

*i4*

$^1\text{H}$  NMR (400 MHz,  $\text{CDCl}_3$ )  $\delta$  5.41 (td,  $J = 6.2, 1.2$  Hz, **H2**, 1H), 4.33 (dd,  $J = 6.3, 0.9$  Hz, **H3**, 2H), 1.96 (d,  $J = 1.1$  Hz, **H1**, 3H).

### 3) Amination of Hex-1-ene **14**

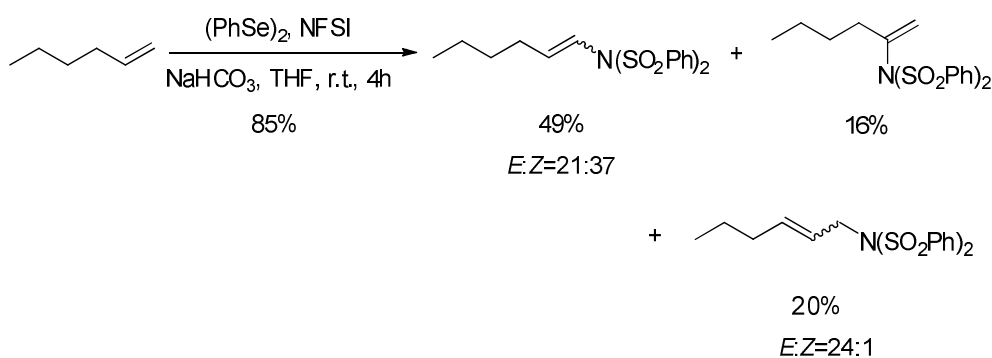

A 5-mL glass vial was charged with a magnetic stir bar,  $\text{PhSeSePh}$  (3.1 mg, 0.01 mmol), NFSI (63.1 mg, 0.20 mmol) and  $\text{NaHCO}_3$  (20.2 mg, 0.24 mmol). Then hex-1-ene **14** (16.8 mg, 0.20 mmol) was added. The vial was capped. The resulting mixture was stirred at room temperature for 4 h. The solvent was removed in vacuo and the residue was purified by silica gel column chromatography (eluent: PE/EA = 9:1, v/v) to give quite pure pale oil mixture of isomers (64.3 mg, 84.7%). It was difficult to separate these isomers because of their similar polarity. Yield of each isomer was determined by relative ratio of them in  $^1\text{H}$  NMR.

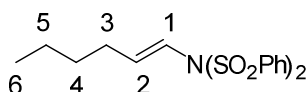

*i1*

$^1\text{H}$  NMR (400 MHz,  $\text{CDCl}_3$ )  $\delta$  1.82–1.74 (m, **H3**, 2H). **H1**, **H2** were overlapped with **i2** in  $\delta$  5.95–5.75 (m).

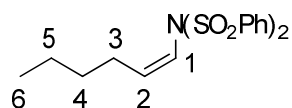

*i2*

$^1\text{H}$  NMR (400 MHz,  $\text{CDCl}_3$ )  $\delta$  2.15–2.07 (m, **H3**, 2H). **H1**, **H2** were overlapped with *i1* in  $\delta$  5.95–5.75 (m).

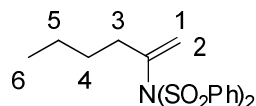

*i3*

$^1\text{H}$  NMR (400 MHz,  $\text{CDCl}_3$ )  $\delta$  5.29 (d,  $J = 0.9$  Hz, **H1**, 1H), 4.78 (d,  $J = 1.0$  Hz, **H2**, 1H), 2.30–2.23 (m, **H3**, 2H).

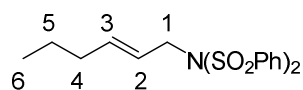

*i4*

$^1\text{H}$  NMR (400 MHz,  $\text{CDCl}_3$ )  $\delta$  5.78–5.66 (m, **H2**, 1H), 5.43 (dtt,  $J = 14.9, 6.6, 1.4$  Hz, **H3** 1H), 4.30 (dd,  $J = 6.7, 0.8$  Hz, **H1**, 2H), 1.93 (q,  $J = 6.7$  Hz, **H4**, 2H), 1.52–1.41 (m, **H5**, 2H), 0.77 (t,  $J = 7.0$  Hz, **H6**, 3H).

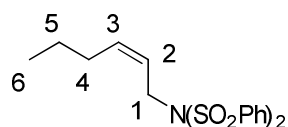

*I5*

$^1\text{H}$  NMR (400 MHz,  $\text{CDCl}_3$ )  $\delta$  4.40 (d,  $J = 6.8$  Hz, **H1**, 2H).

$^{13}\text{C}$  NMR (101 MHz,  $\text{CDCl}_3$ )  $\delta$  143.71, 143.47, 143.15, 140.16, 139.60, 139.50, 139.47, 137.08, 133.91, 133.88, 133.85, 133.73, 129.02, 128.96, 128.91, 128.72, 128.24, 128.14, 124.20, 120.53, 120.10, 119.14, 51.24, 35.80, 34.15, 30.51, 30.45, 29.66, 28.92, 27.30, 22.45, 22.09, 22.00, 21.91, 13.94, 13.79, 13.76.

HR-ESI-MS  $m/z$  calcd.  $\text{C}_{18}\text{H}_{21}\text{NO}_4\text{S}_2$   $[\text{M} + \text{NH}_4]^+$ : 397.1256, found: 397.1249.

## 7. NMR study of amination of allylbenzene 9

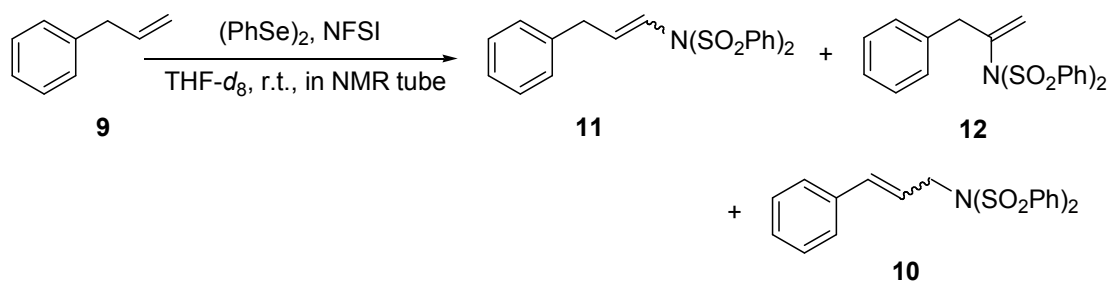

To a solution of allylbenzene (23.6 mg, 0.20 mmol) in THF- $d_8$  (0.5 mL) in a dry NMR tube was added a solution of PhSeSePh (3.1 mg, 0.01 mmol) and NFSI (63.1 mg, 0.20 mmol) in THF- $d_8$  (0.5 mL) at room temperature. The  $^1\text{H}$  NMR spectra of reaction mixture was collected every 2 min or 4 min during the initial 4 h, every 1 h approximately during 4-12 h, and every 30 min approximately during 23-26 h.

**Table S1:** Relative amount and NMR spectra data of allylbenzene and isomer products measured in THF- $d_8$ <sup>[a]</sup>

| Reaction                       | Allylbenzene | (E)-10 | (Z)-10 | (E)-11 | (Z)-11 | 12  |
|--------------------------------|--------------|--------|--------|--------|--------|-----|
| Mixtures                       | (9)          |        |        |        |        |     |
| Relative Amount <sup>[b]</sup> | 26 %         | 59 %   | 1 %    | 4 %    | 3 %    | 6 % |

<sup>[a]</sup> Time = 717 min. <sup>[b]</sup> The relative amounts of allylbenzene and isomer products were determined by comparison of their  $^1\text{H}$  NMR integral values to solvent signals. Characteristic hydrogen atoms and chemical shifts of solvent, allylbenzene and isomer products in THF- $d_8$  were showed as below:

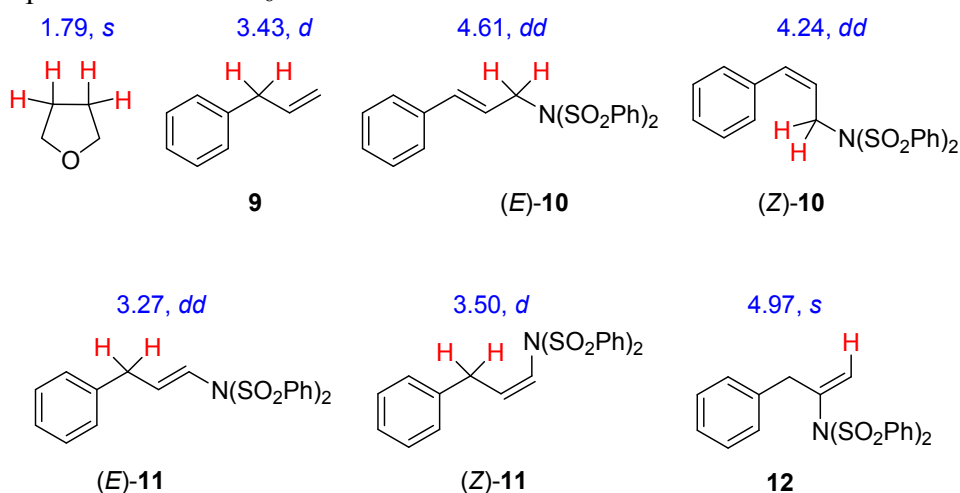

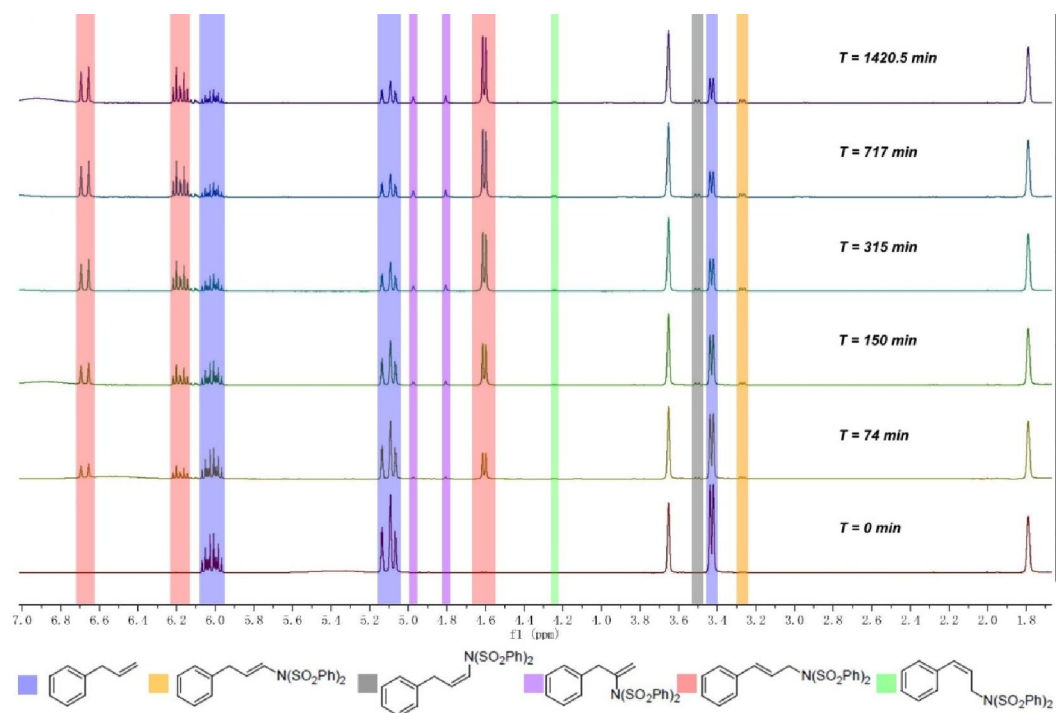

**Scheme S1:** Extract (1.70-7.00 ppm) of the  $^1\text{H}$  NMR spectra of reaction mixture in  $\text{THF-}d_8$ .

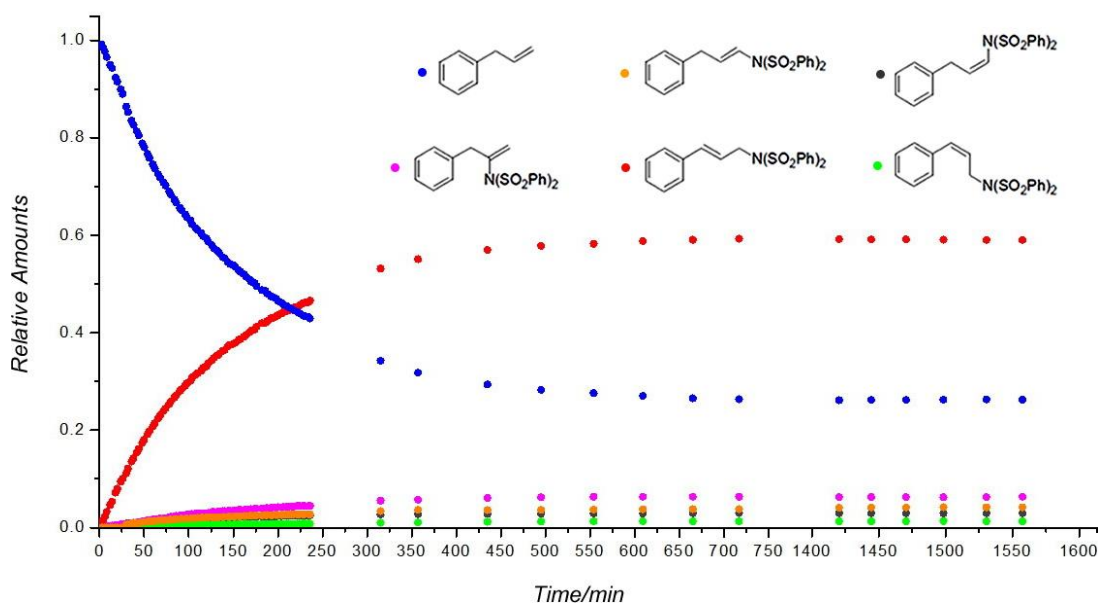

**Scheme S2:** Correlation between the relative amounts of allylbenzene and isomer products and the reaction time.

## 8. NMR spectra for new compounds

### NMR Spectra of Product (2a)

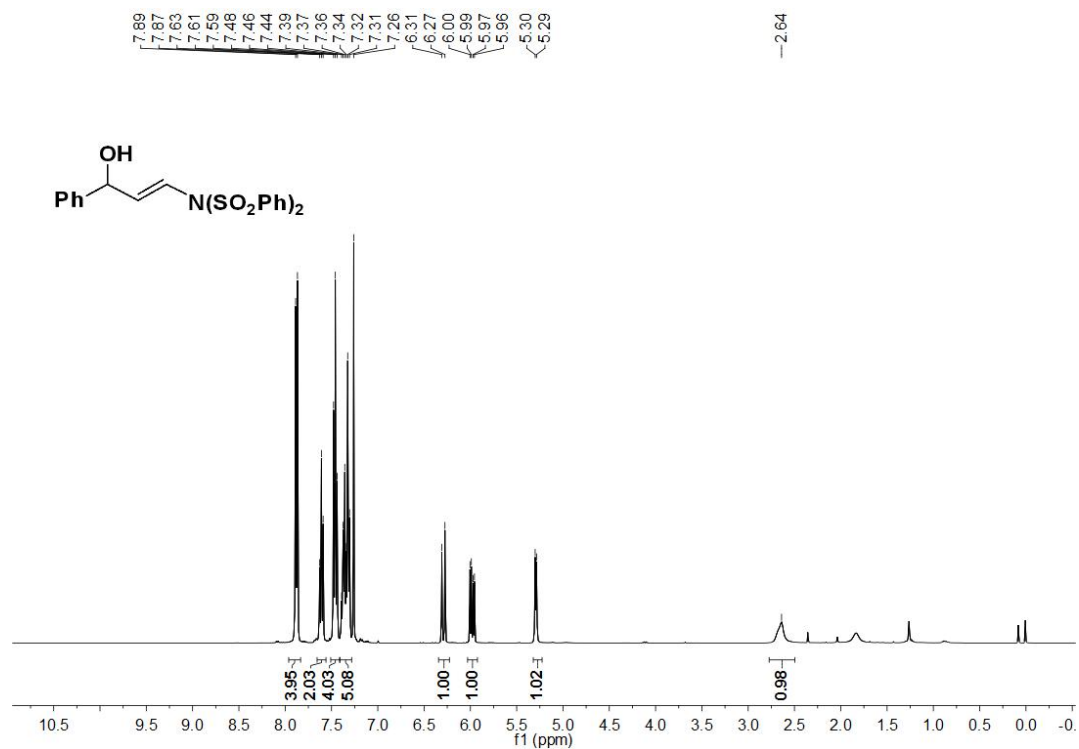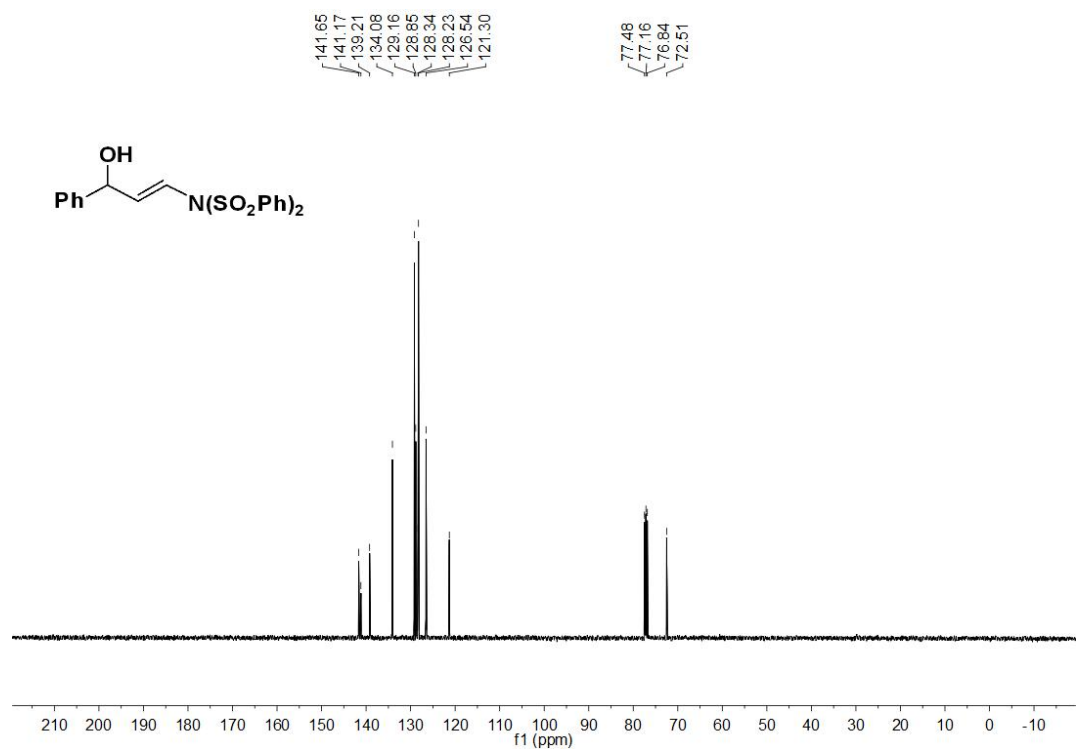



## NMR Spectra of Product (2b)

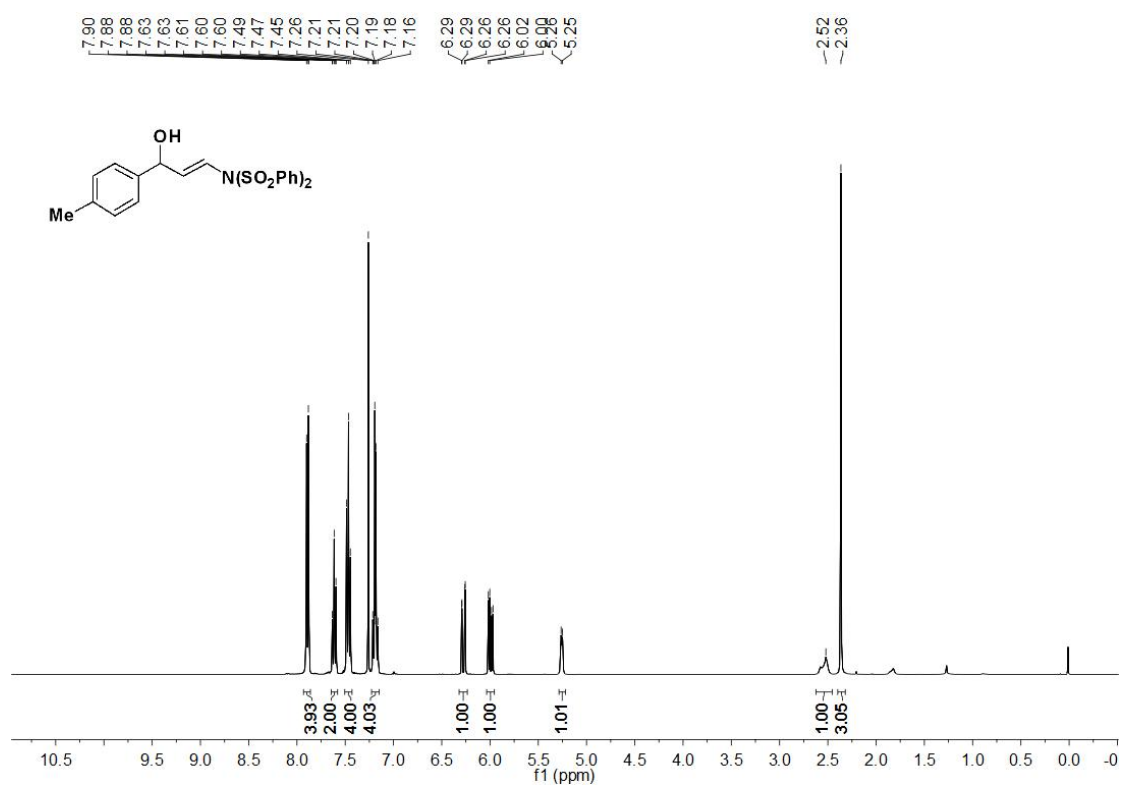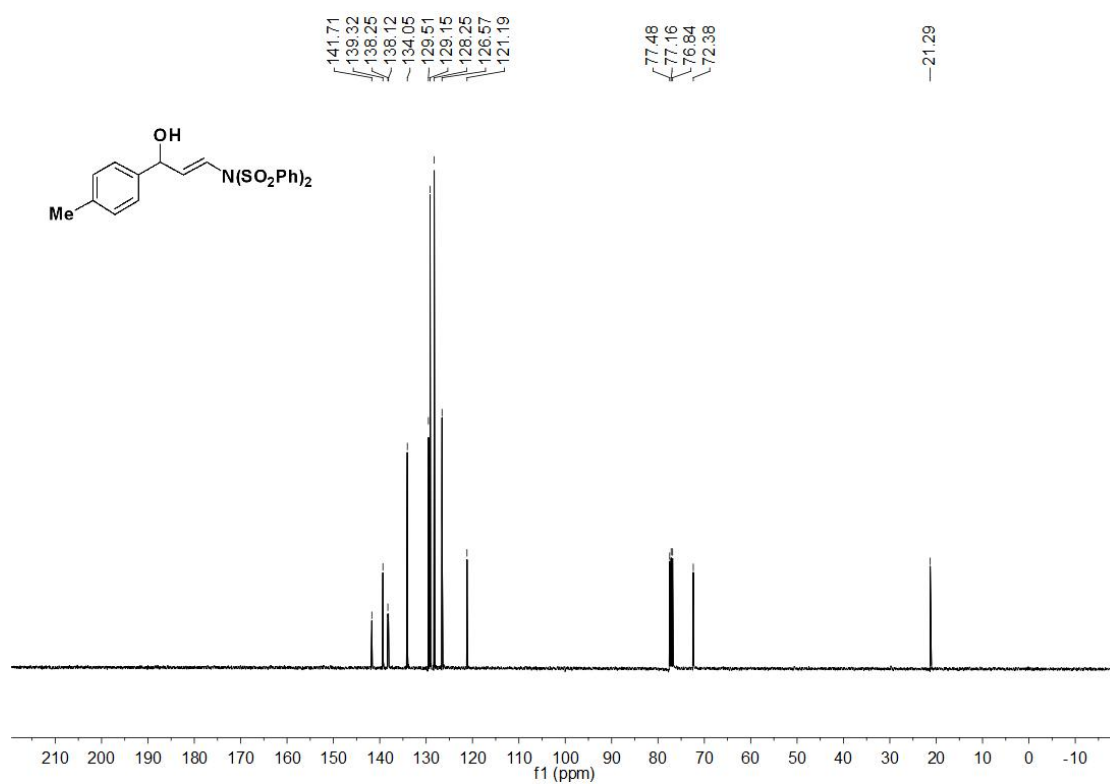

# NMR Spectra of Product (2c)

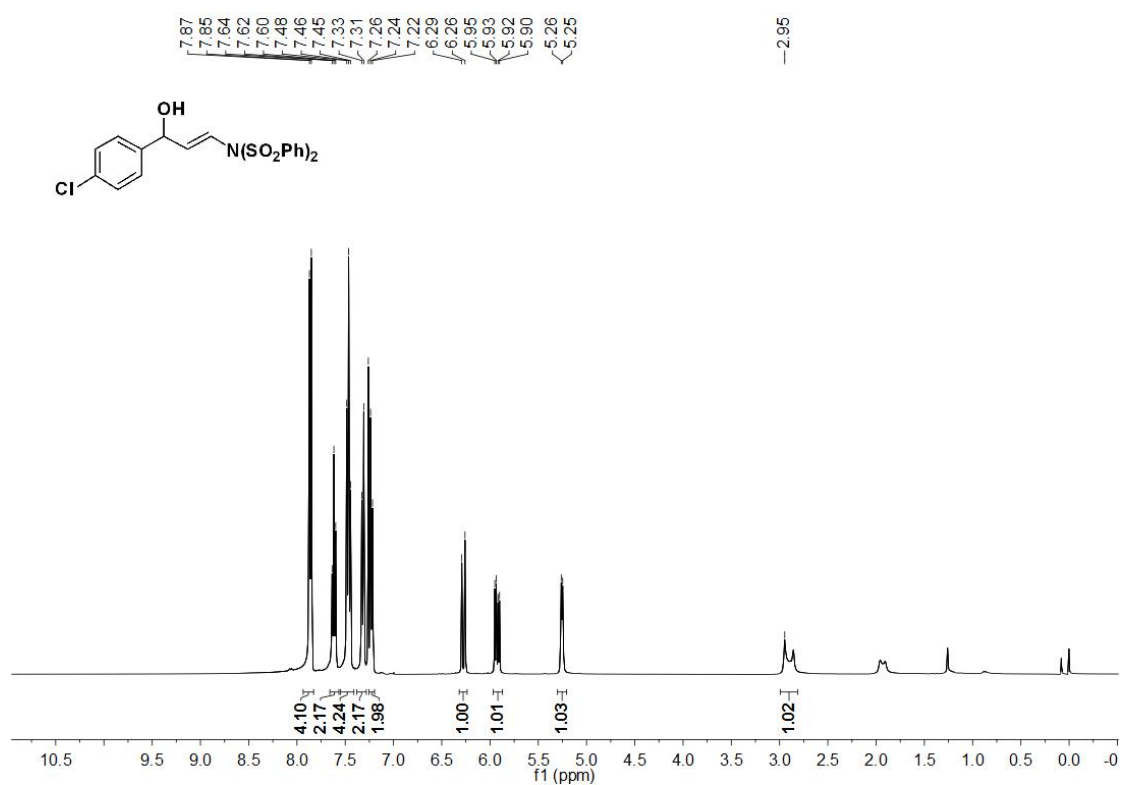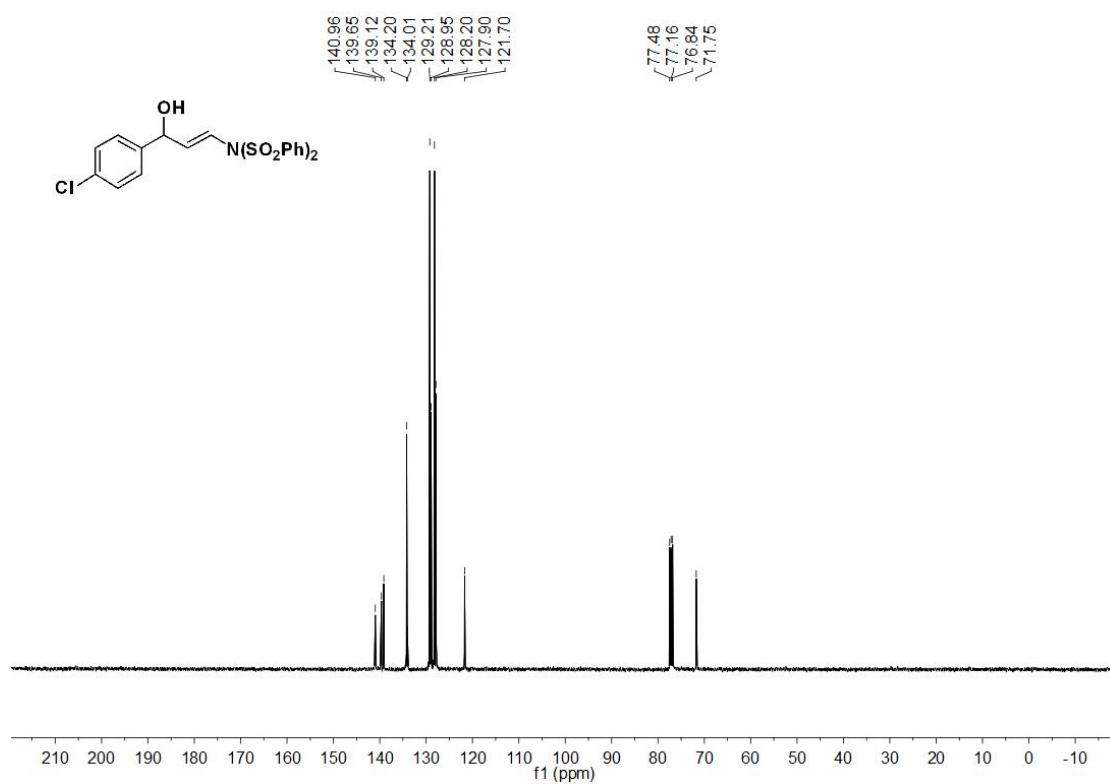

# NMR Spectra of Product (2d)

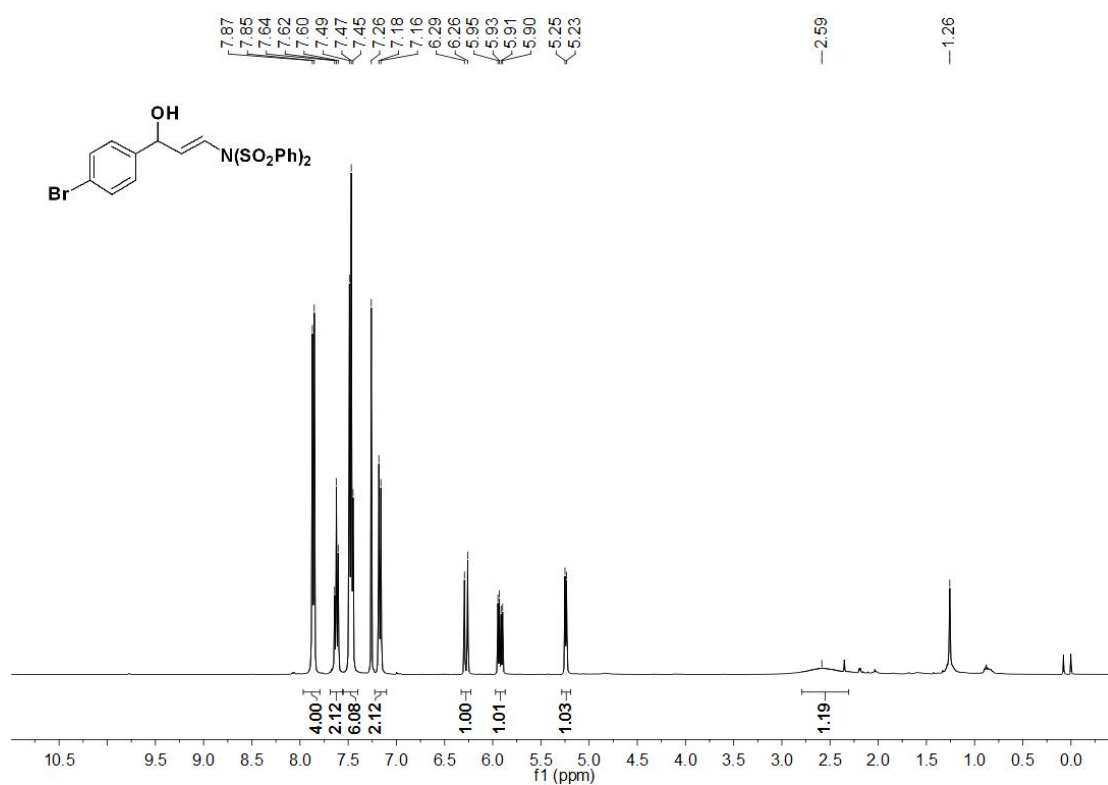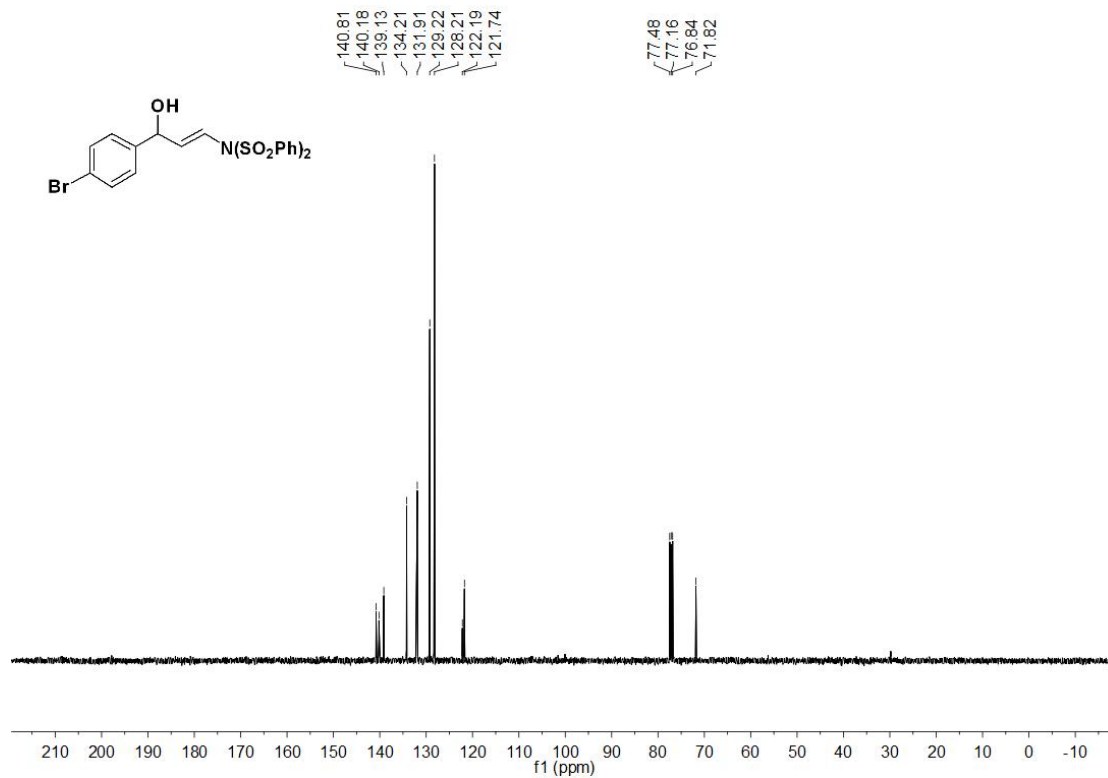

## NMR Spectra of Product (2e)

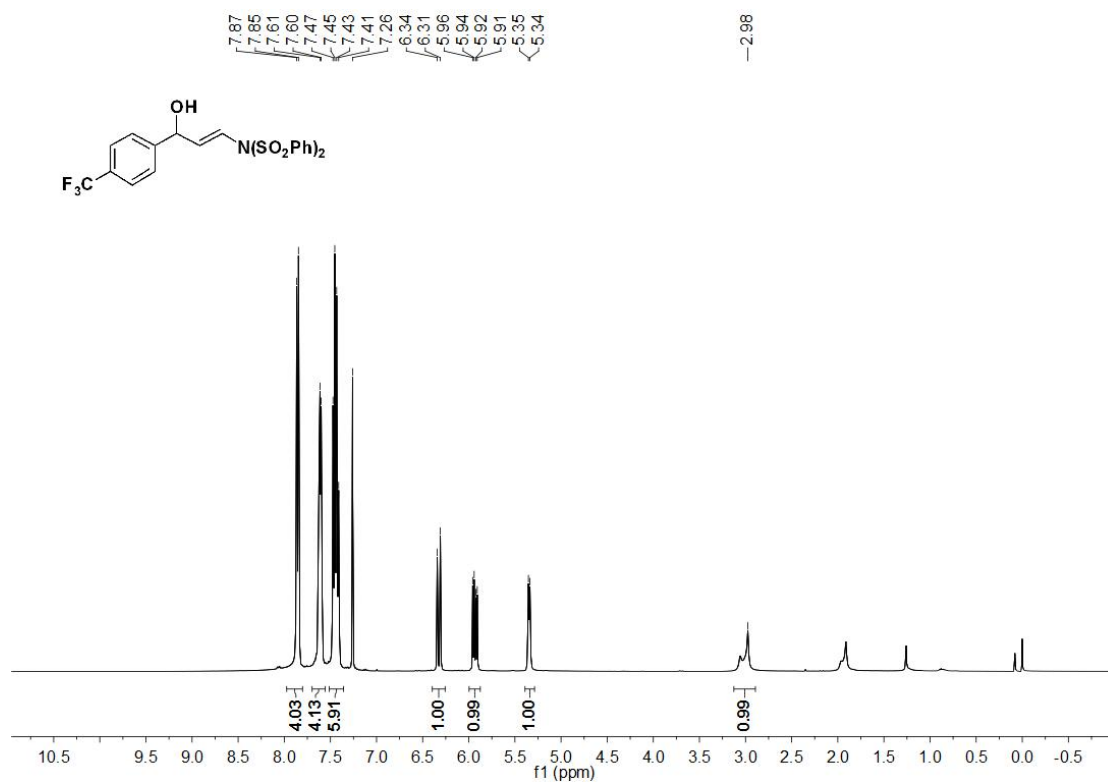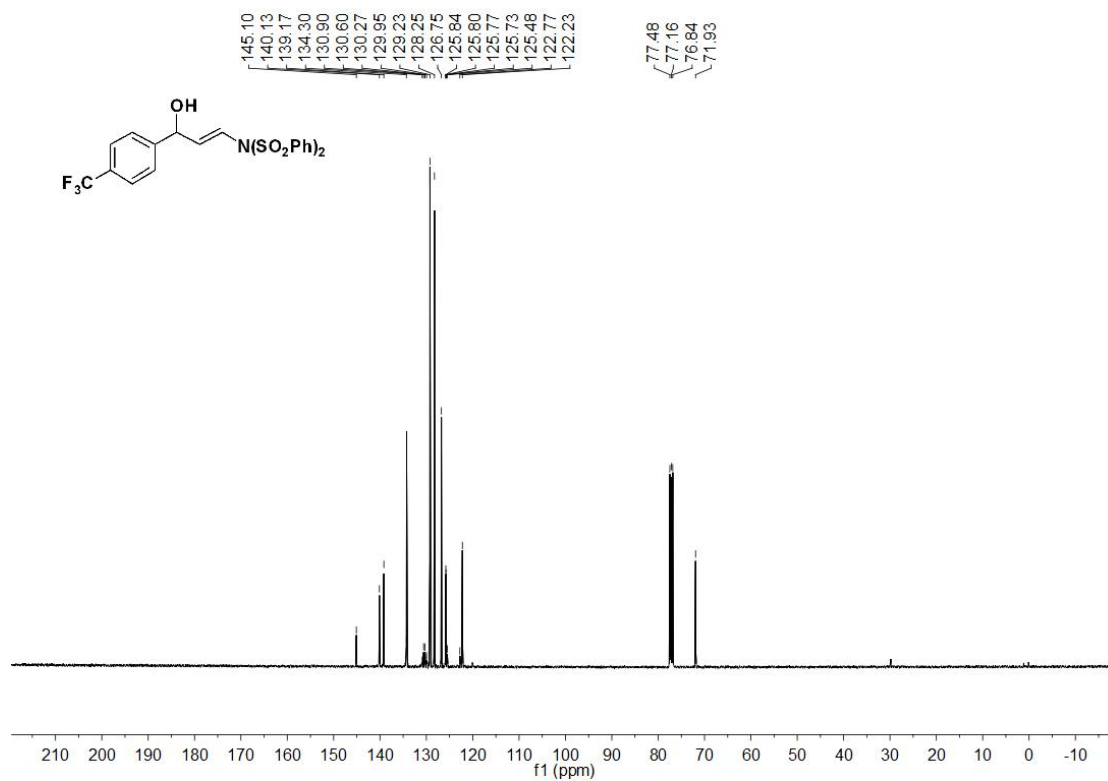

# NMR Spectra of Product (2f)

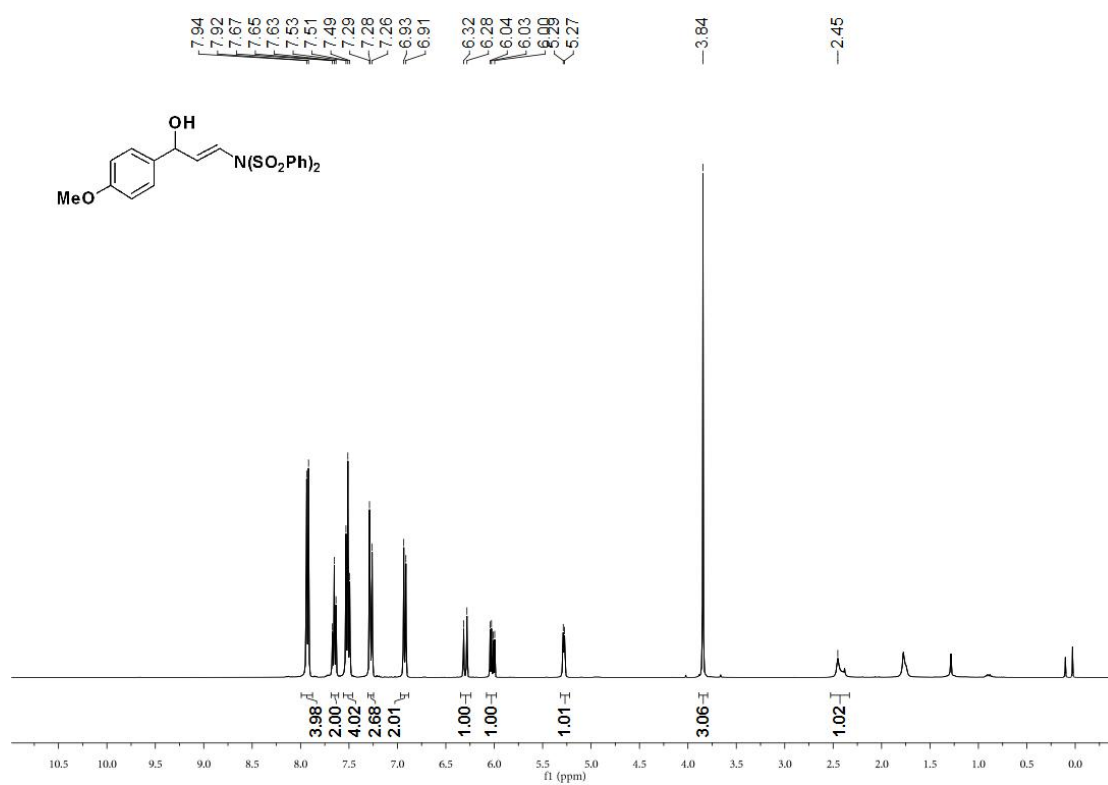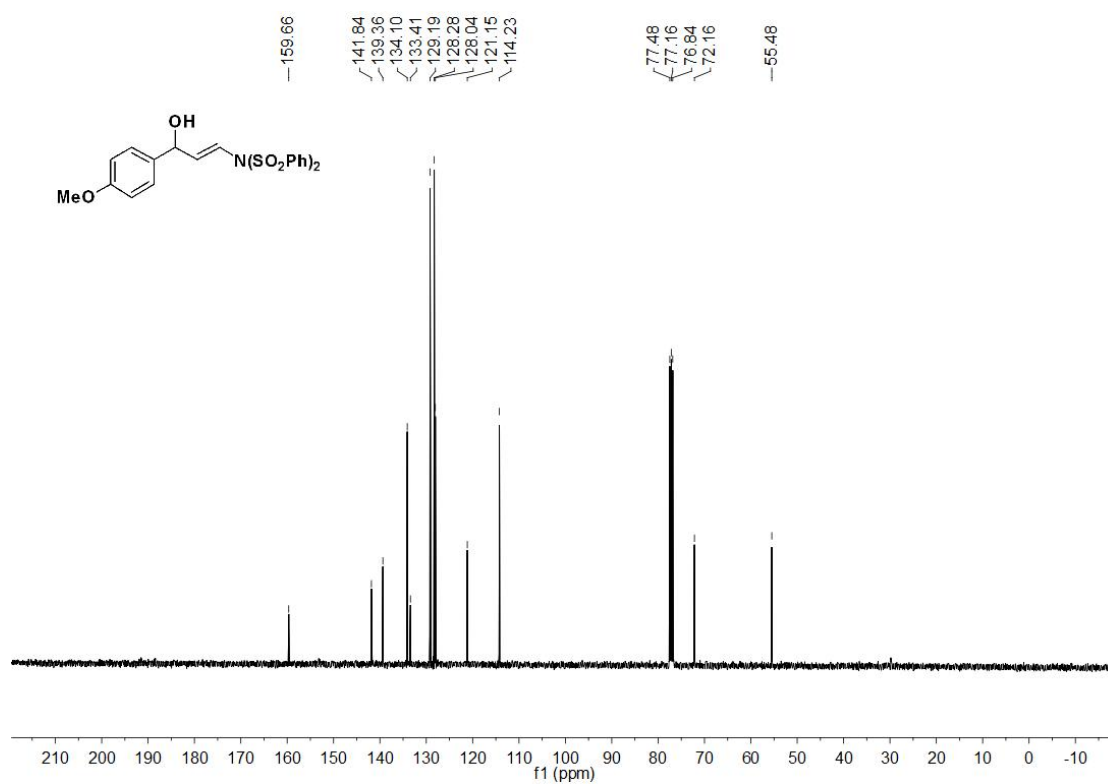

## NMR Spectra of Product (2g)

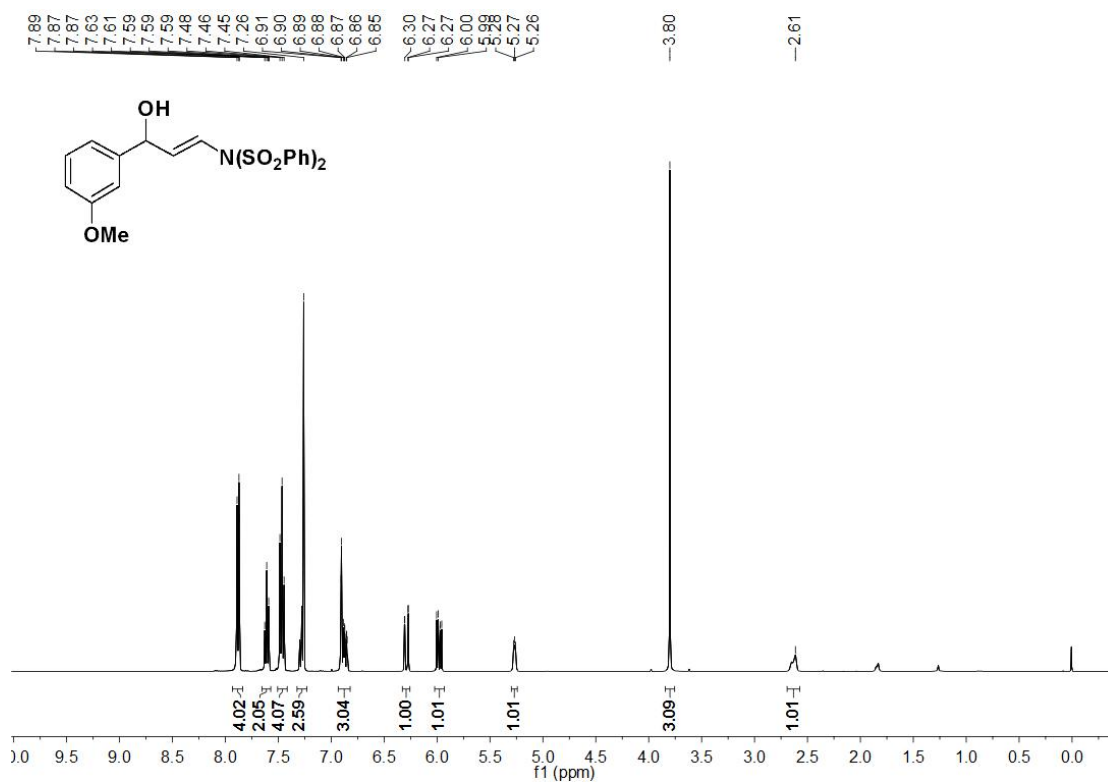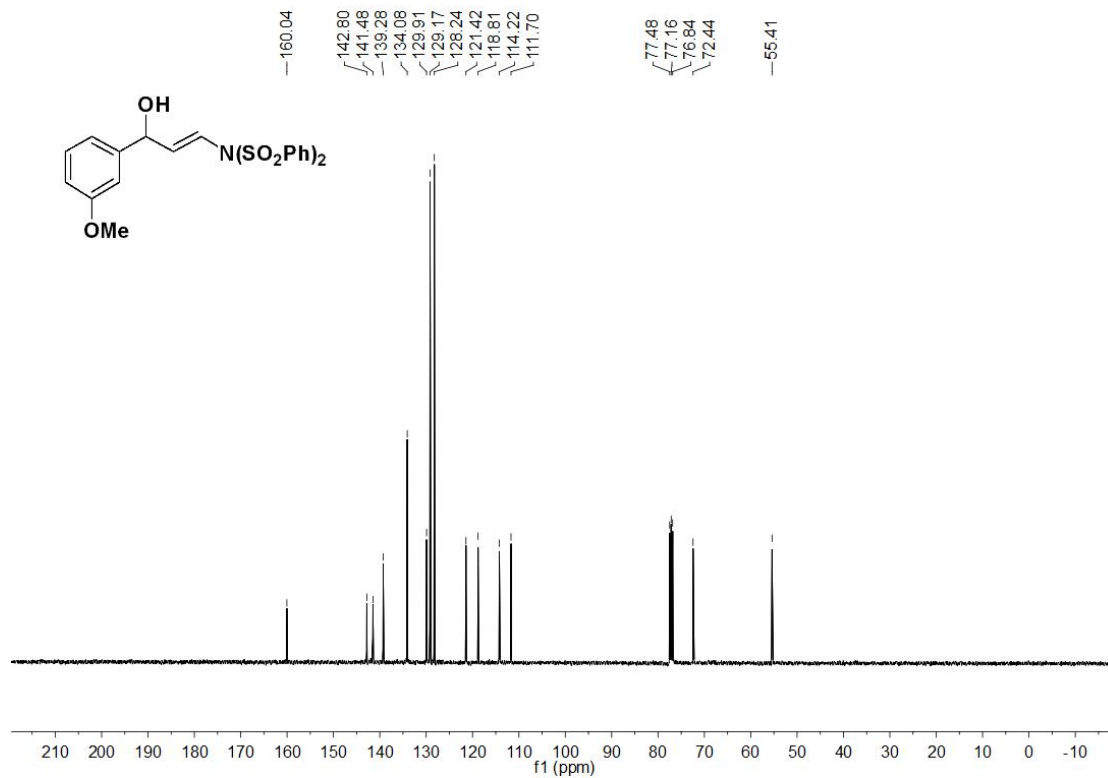

## NMR Spectra of Product (2h)

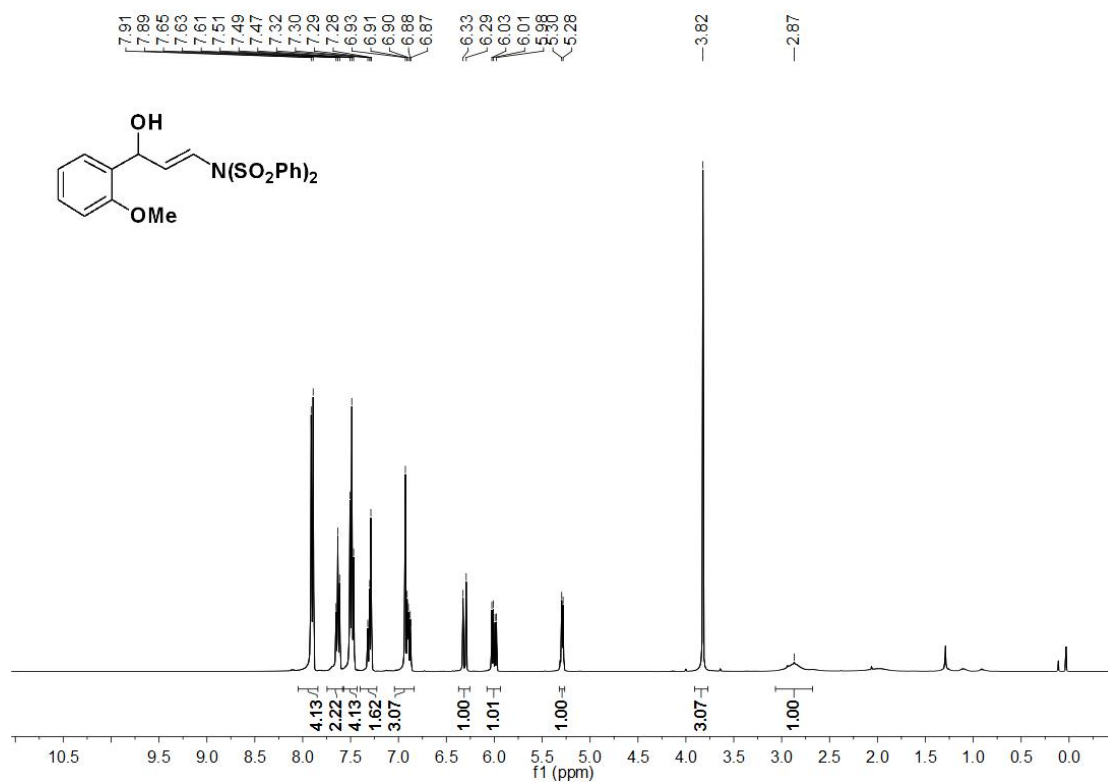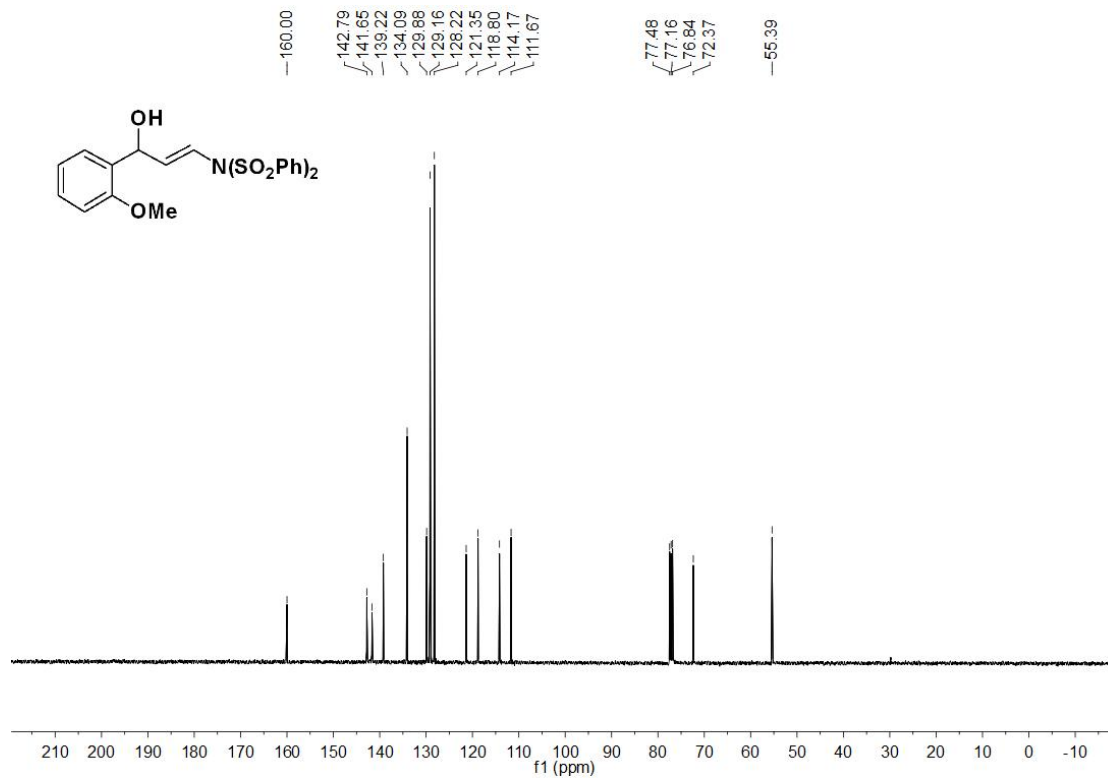

## NMR Spectra of Product (2i)

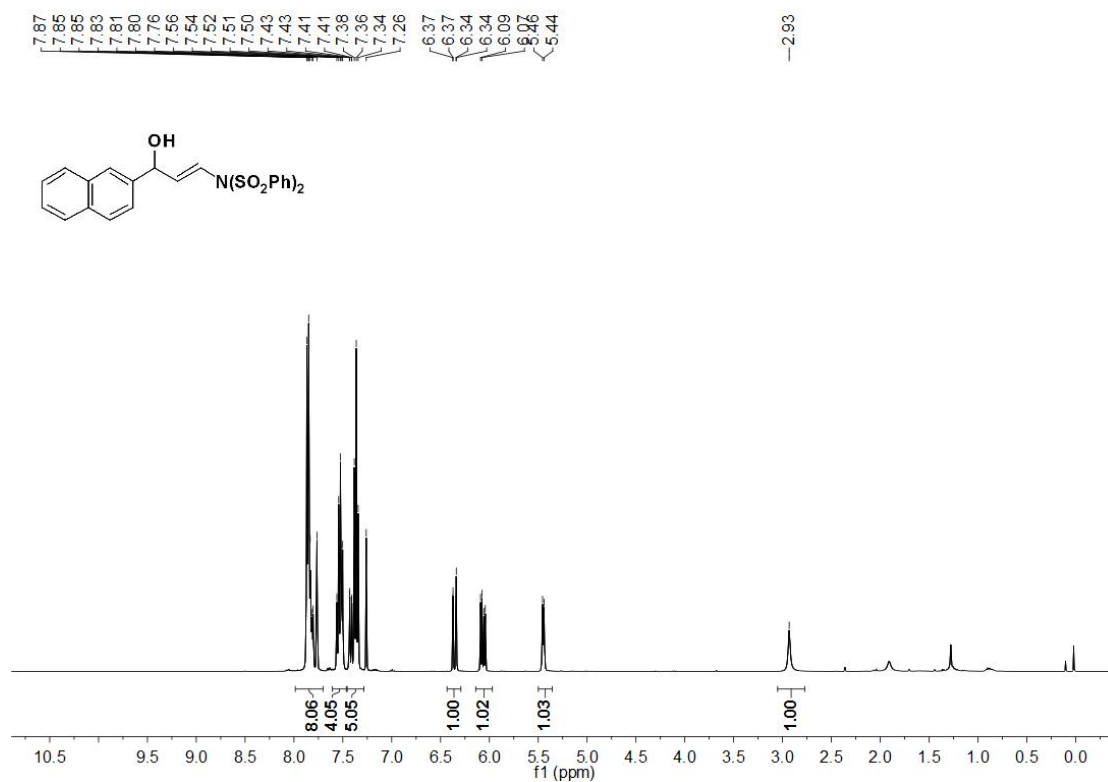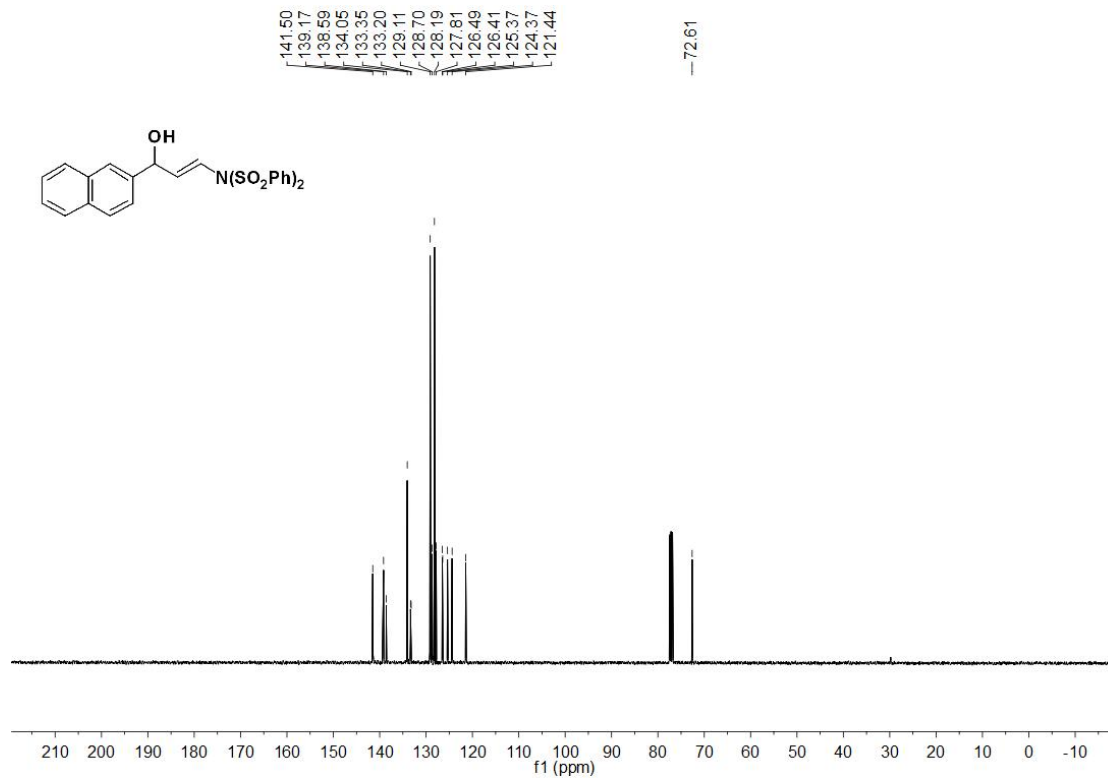



## NMR Spectra of Product (2j)

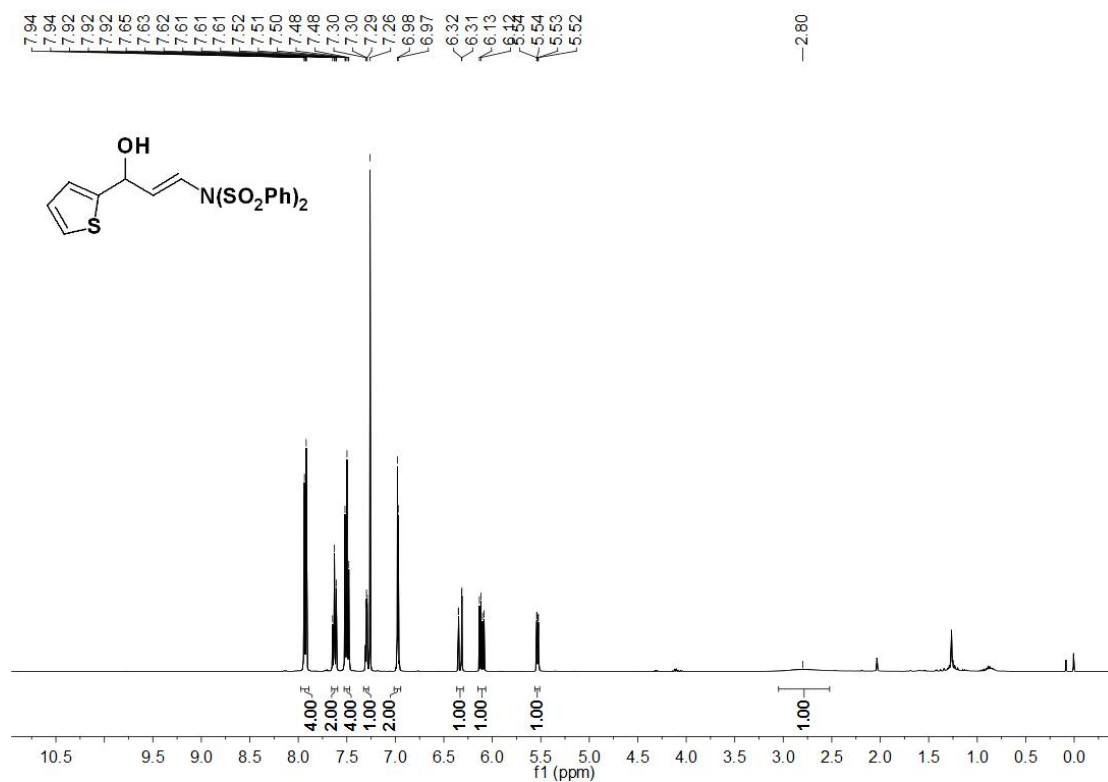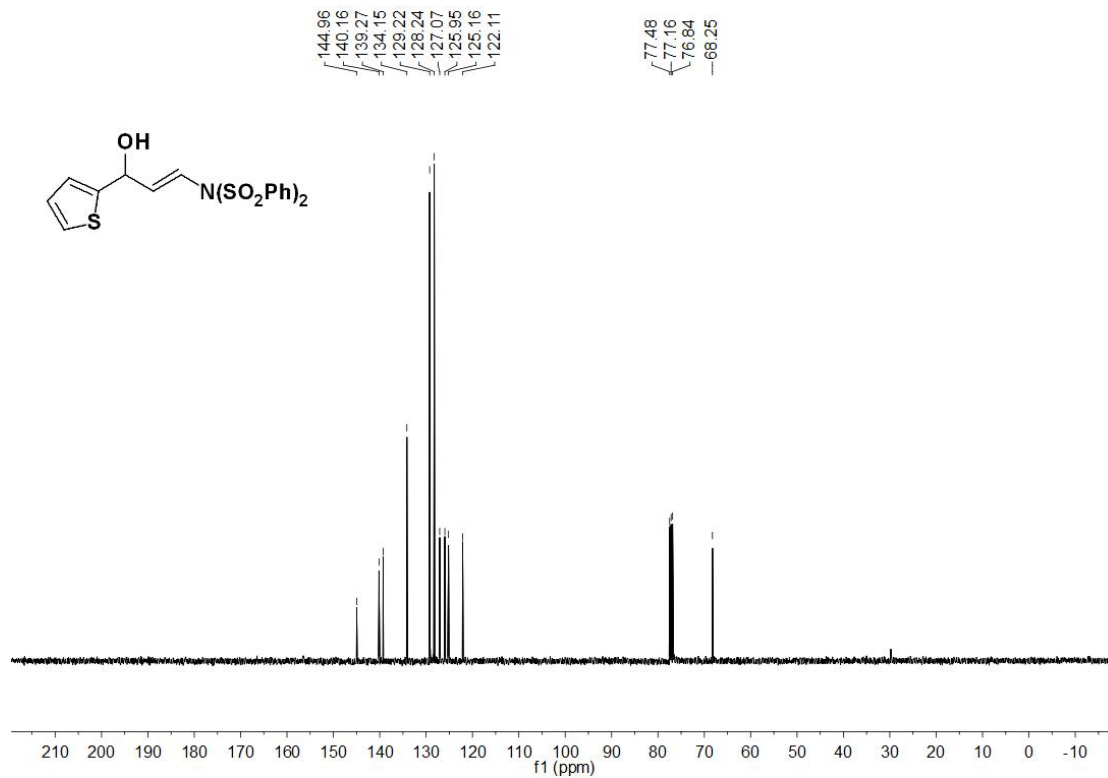

# NMR Spectra of Product (2k)

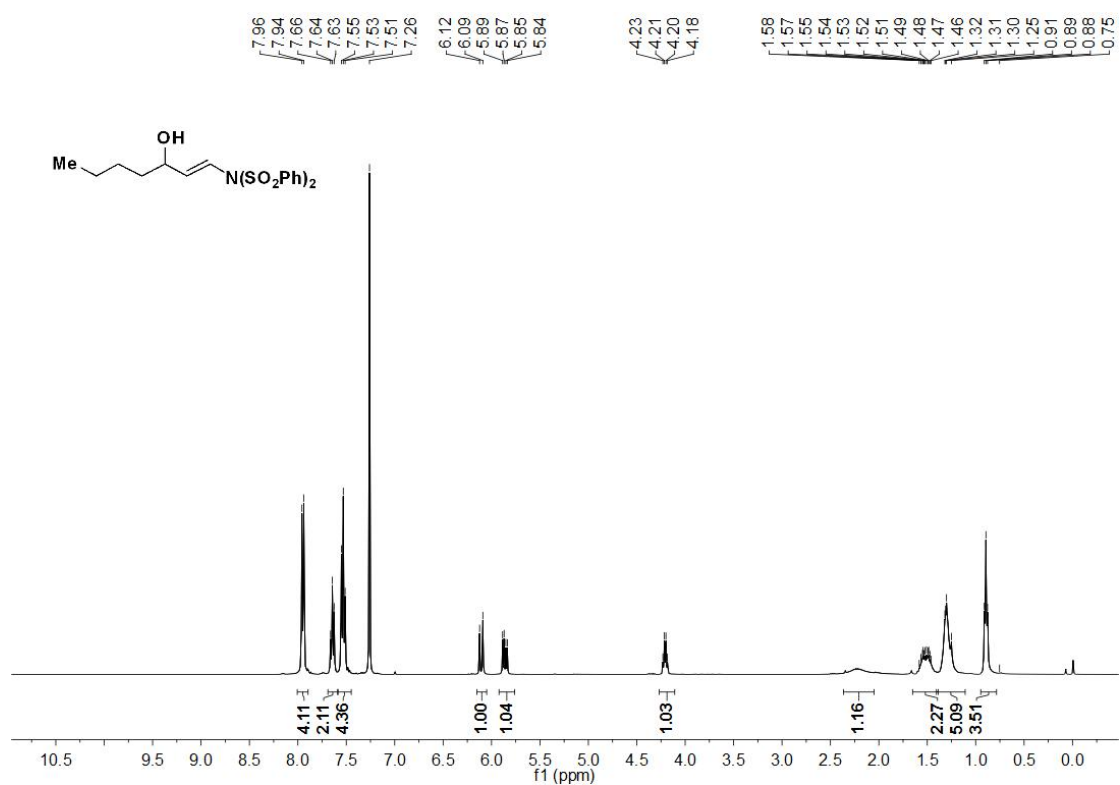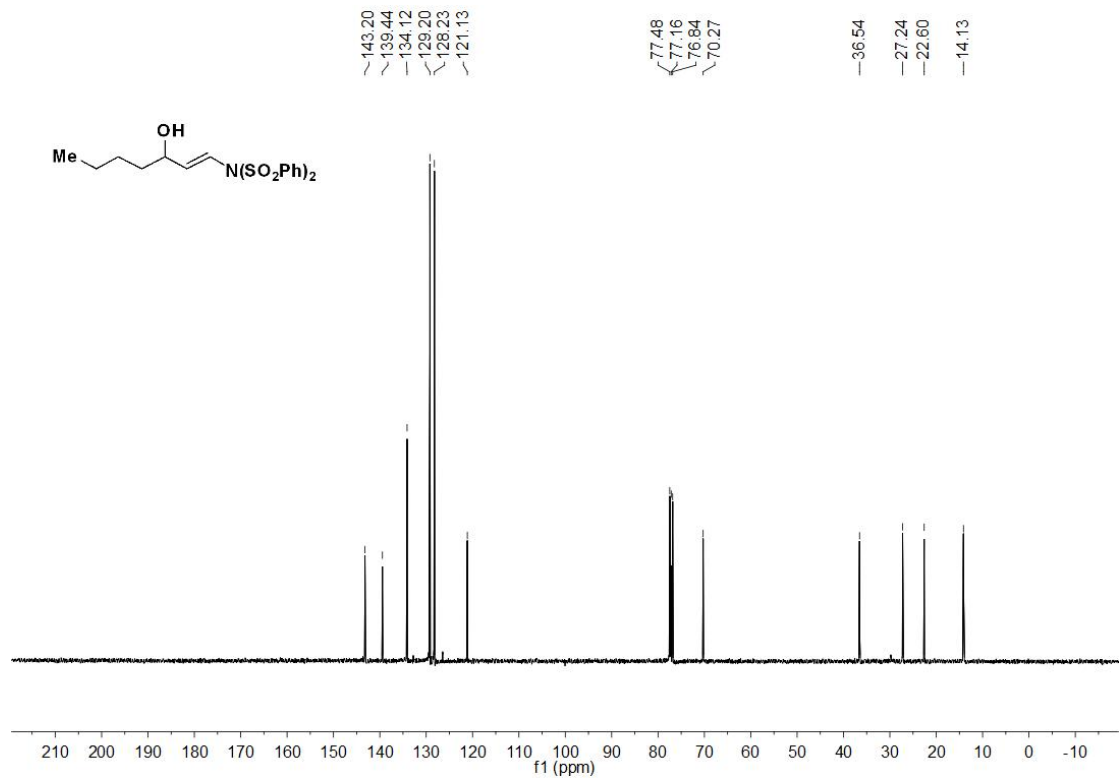

# NMR Spectra of Product (2l)

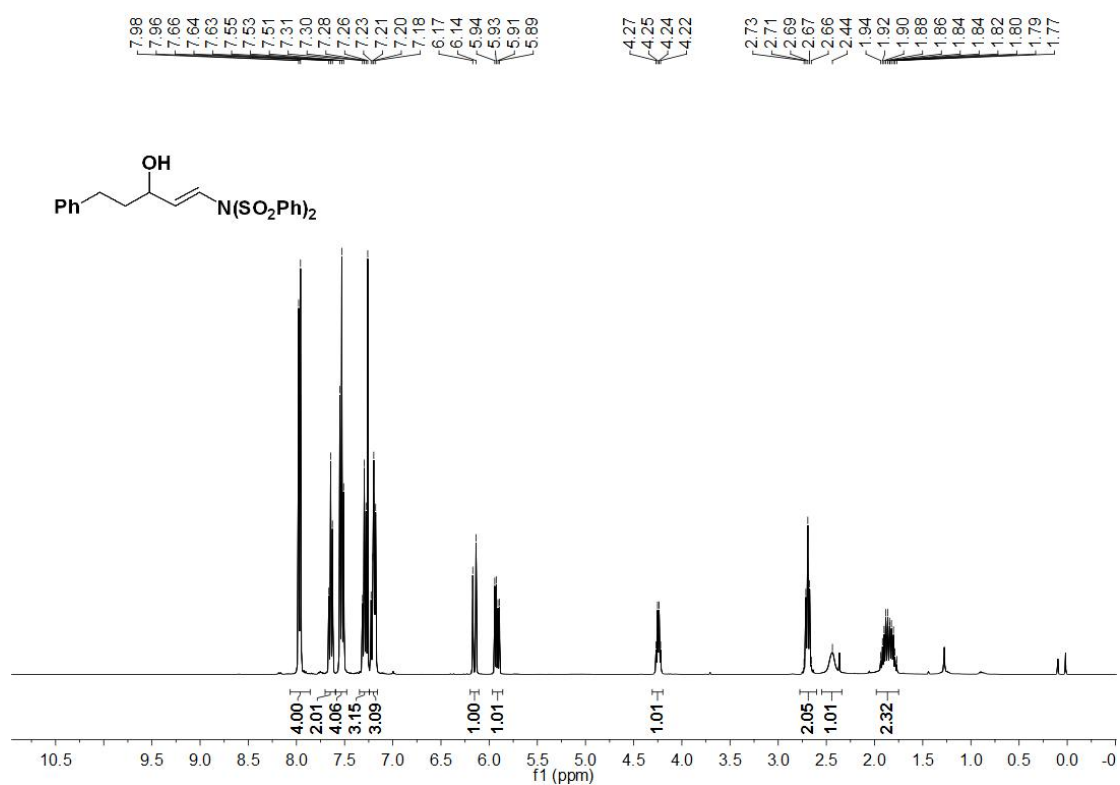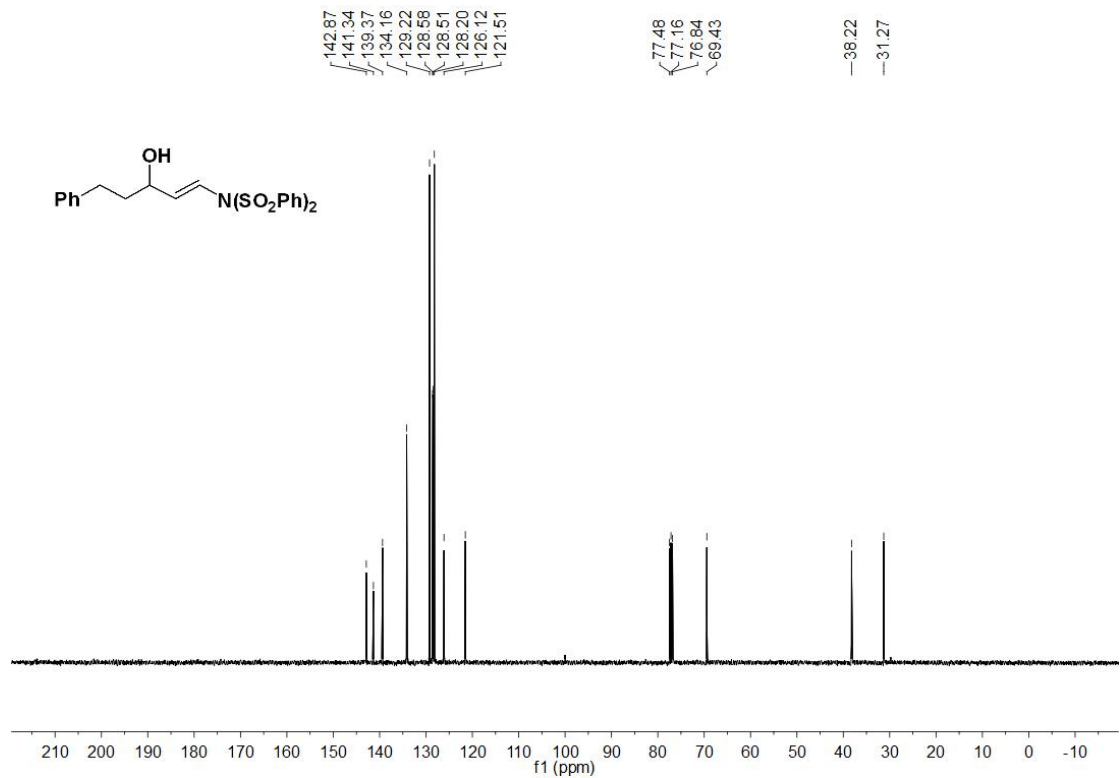

## NMR spectra of Product (2m)

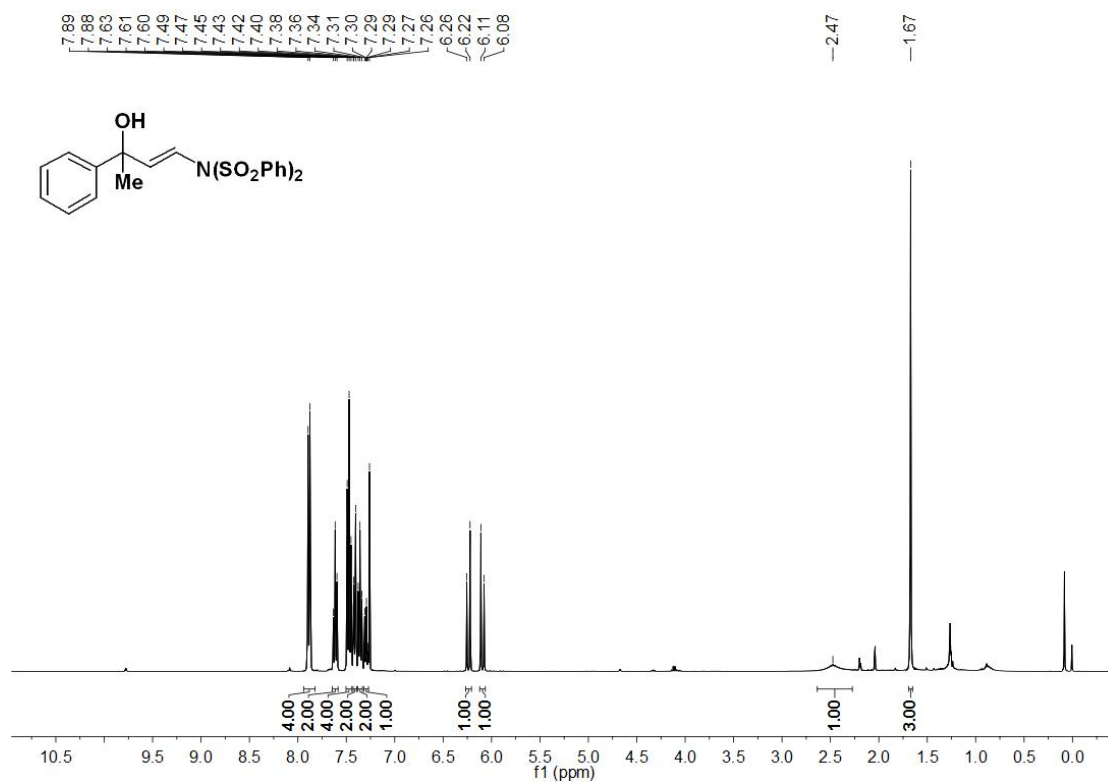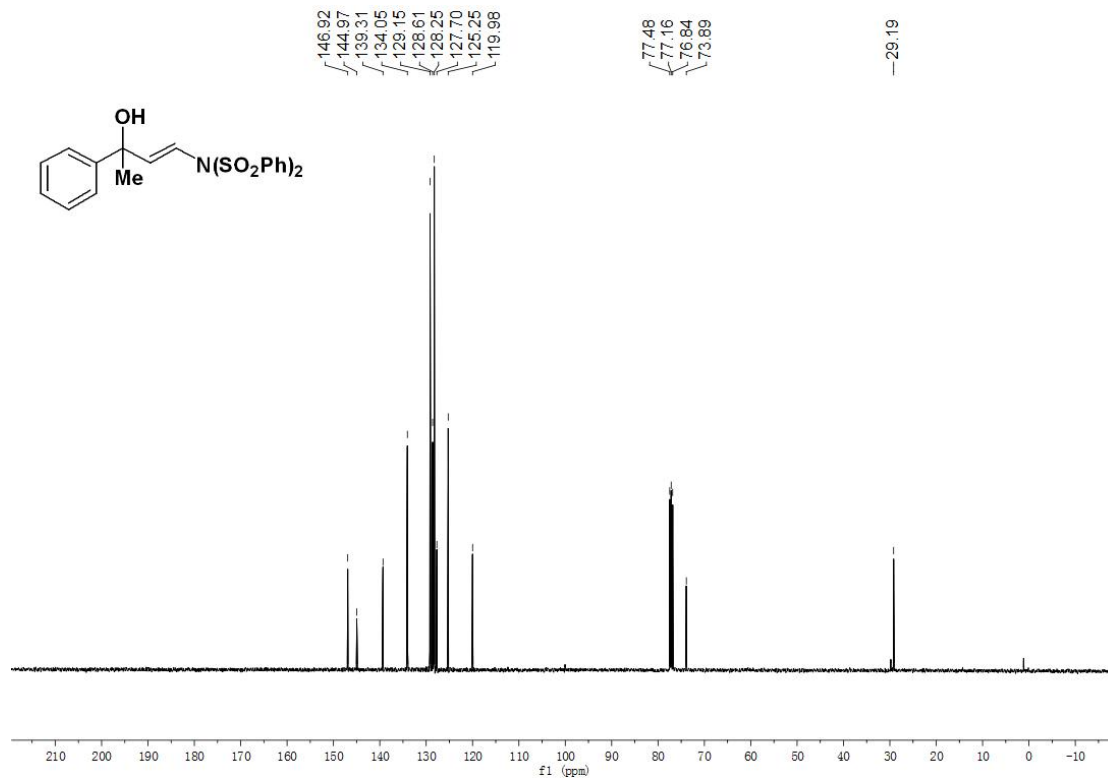

## NMR Spectra of Product (2n)

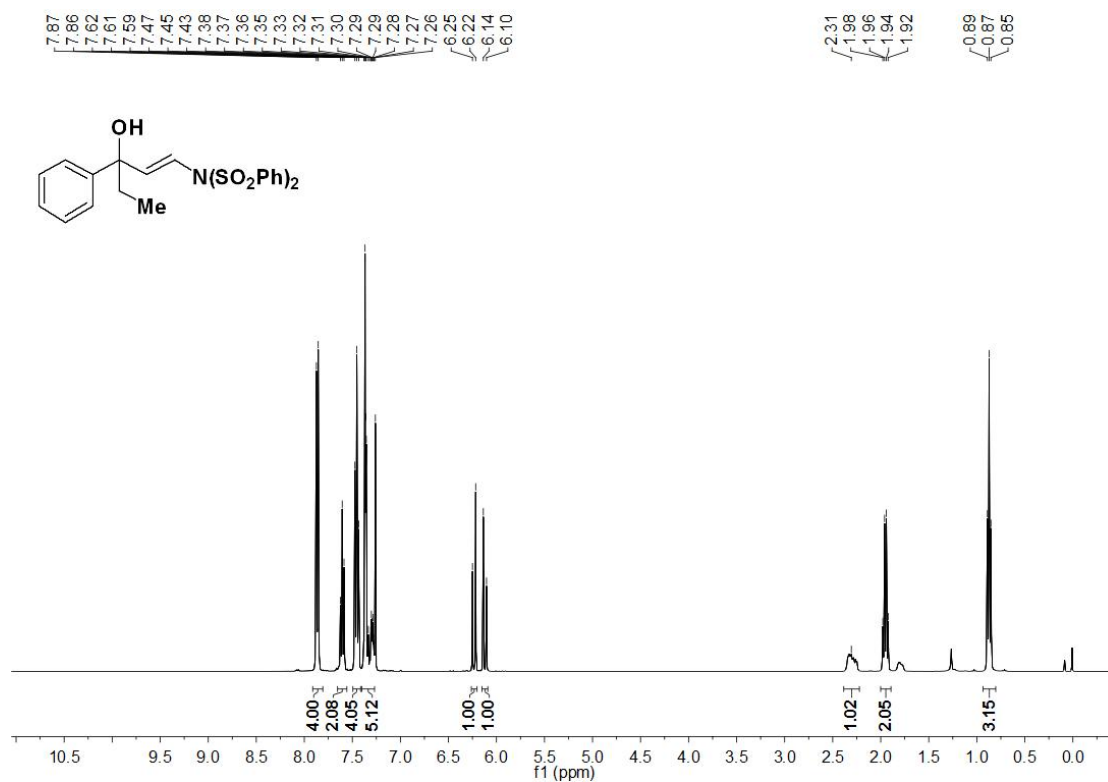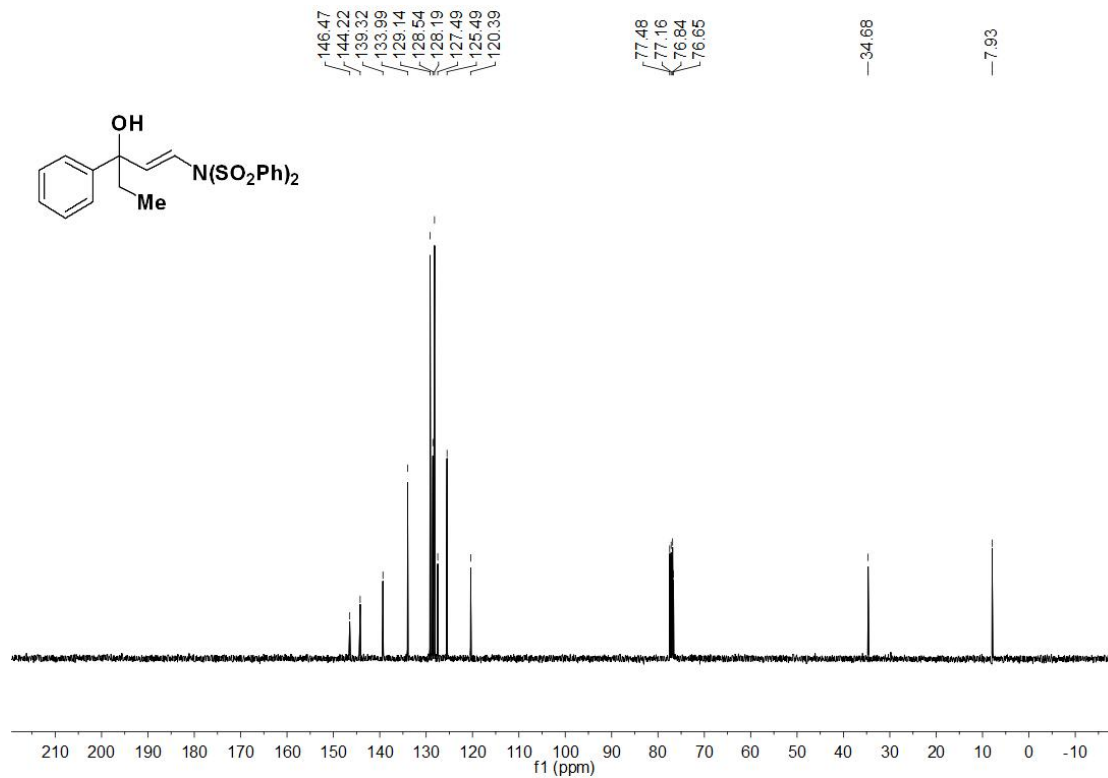

## NMR Spectra of Product (2o)

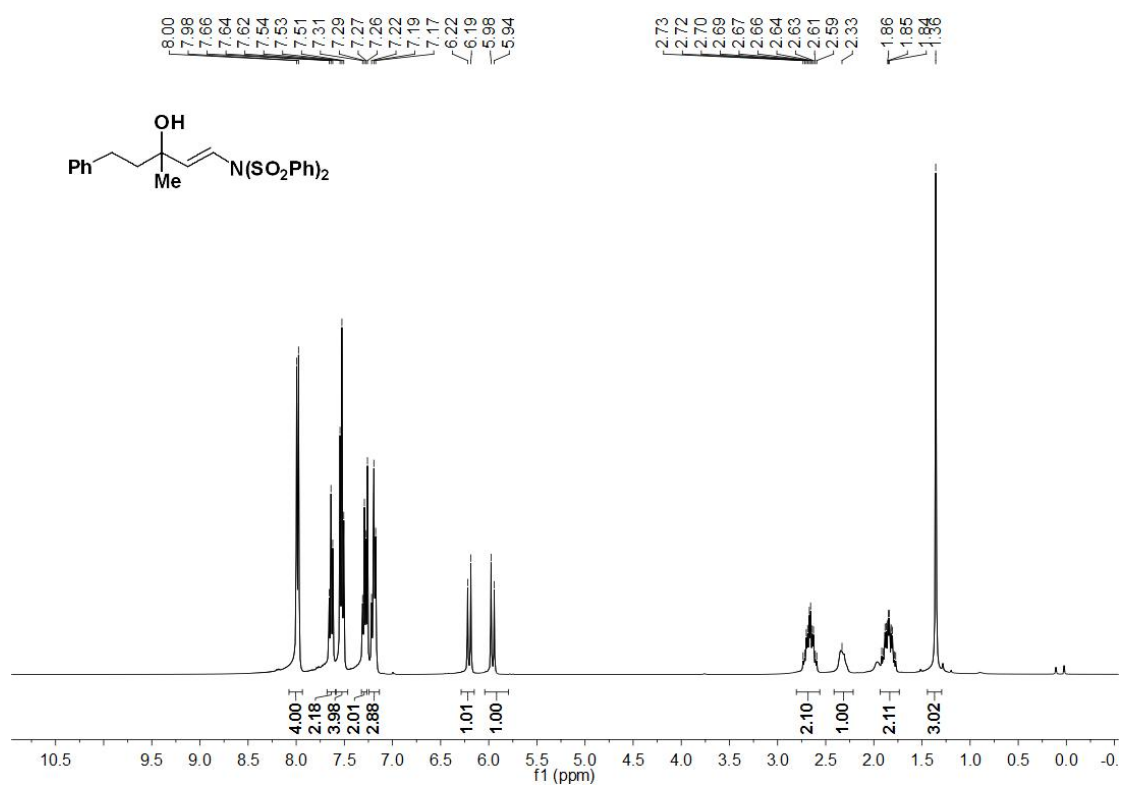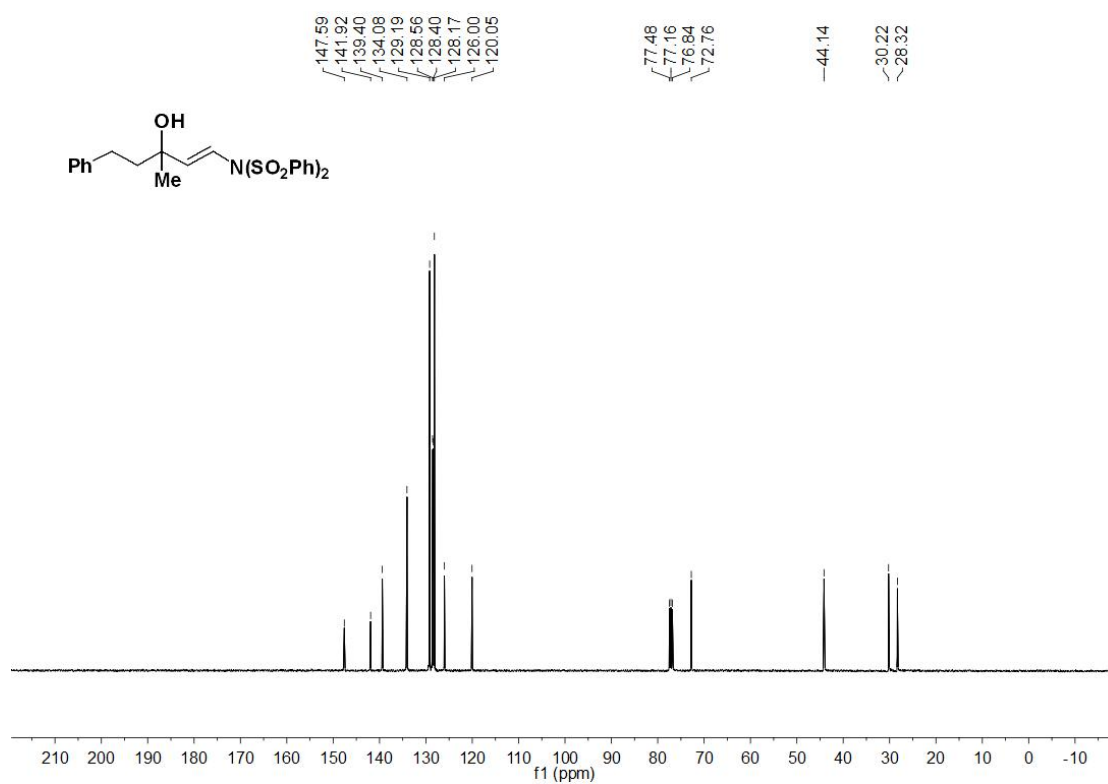

# NMR Spectra of Product (2p)

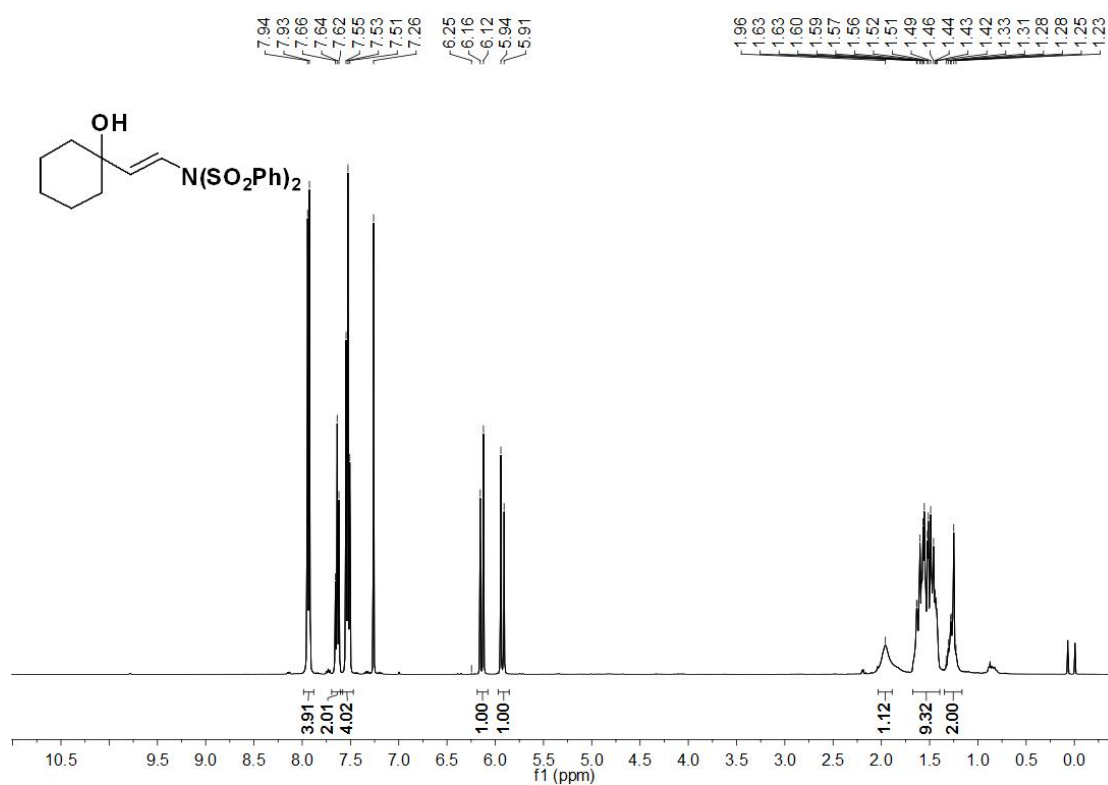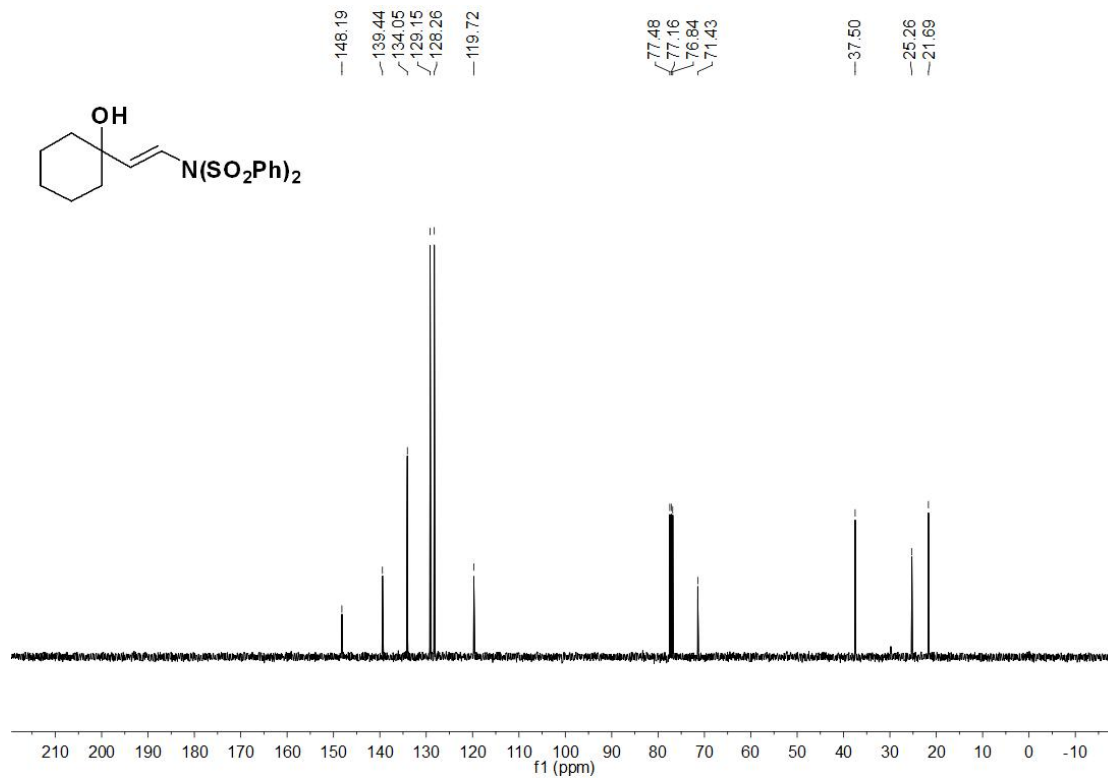

# NMR Spectra of Product (5a)

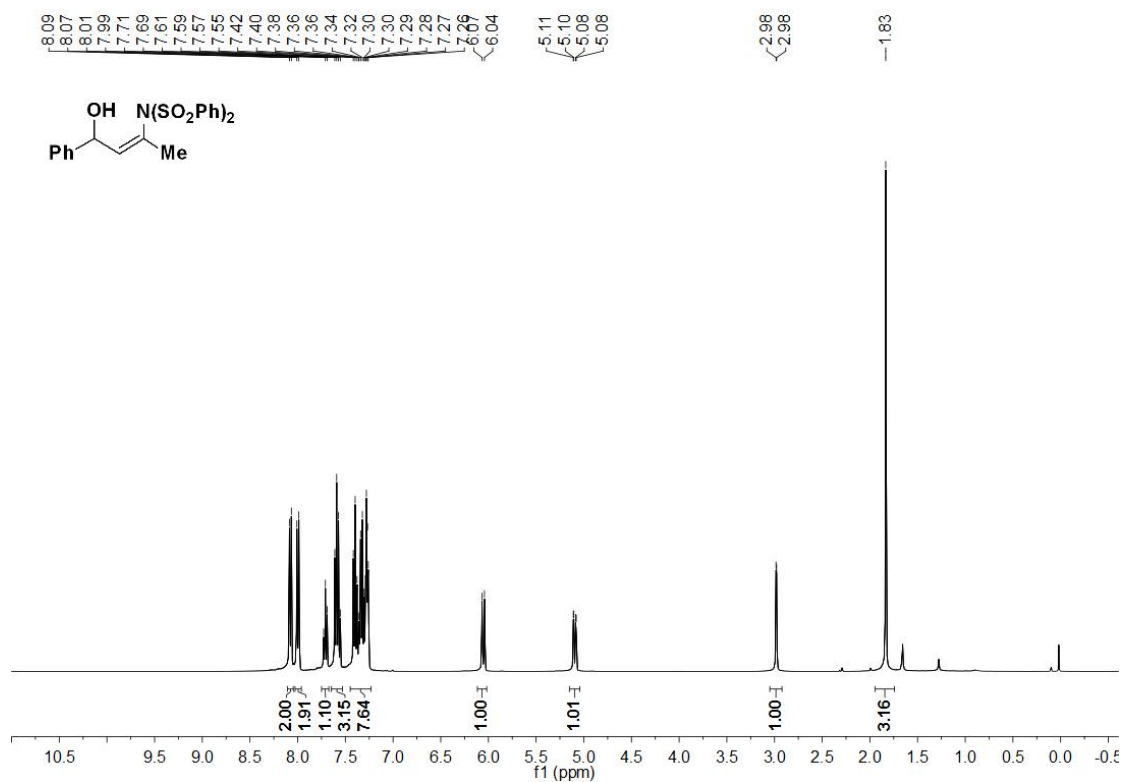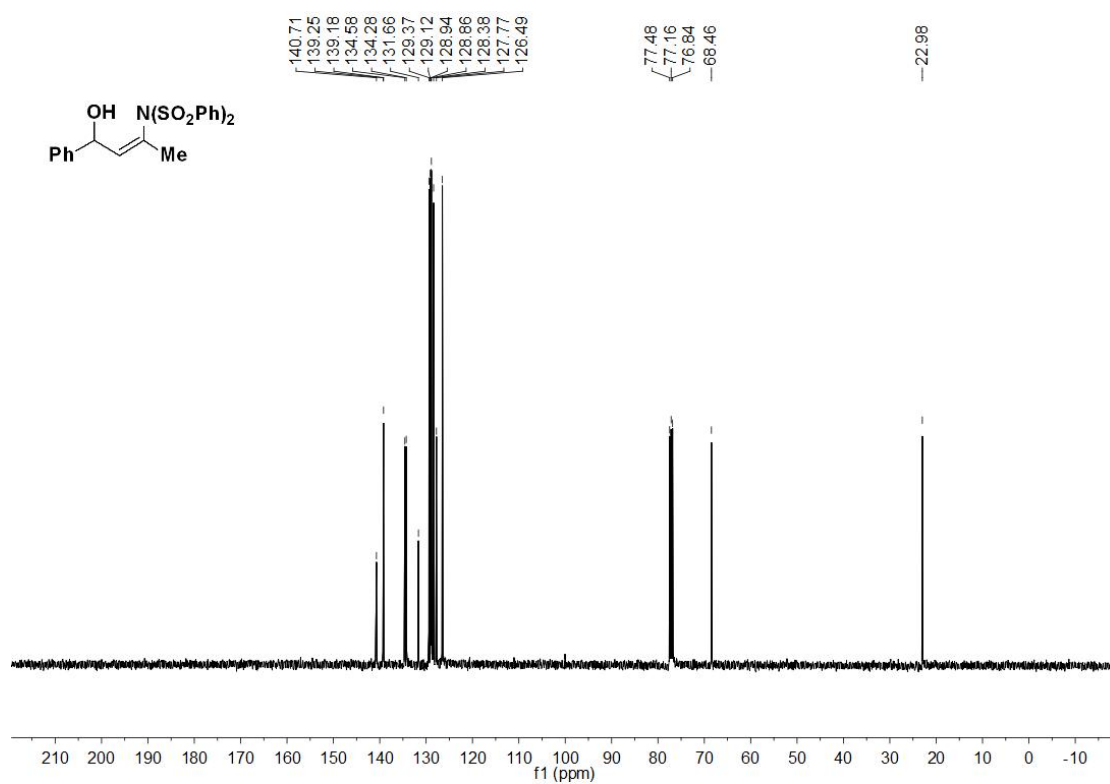



## NMR Spectra of Product (5b)

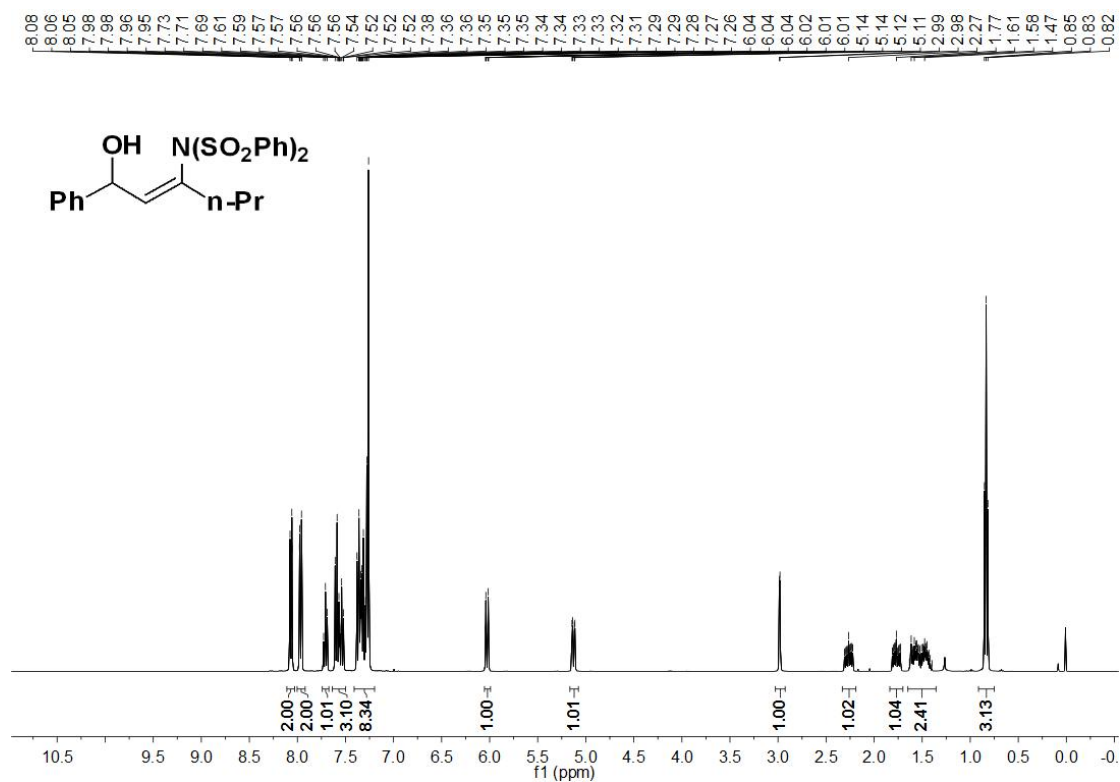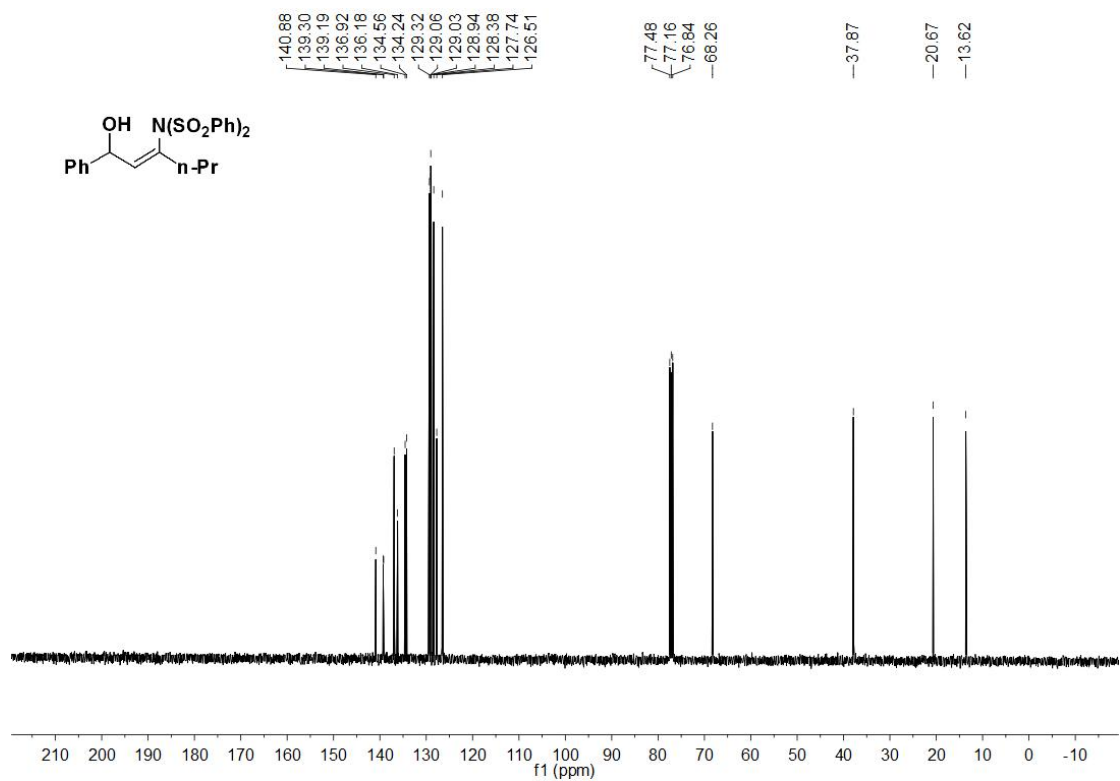

# NMR Spectra of Product (5c)

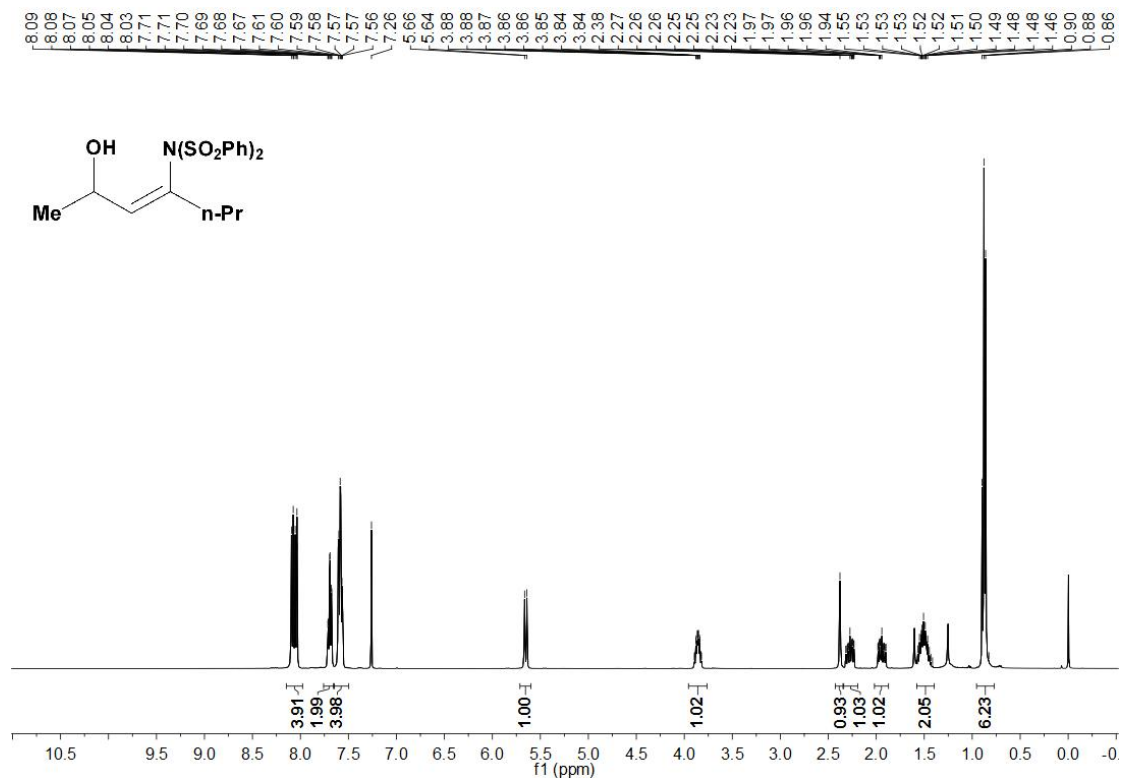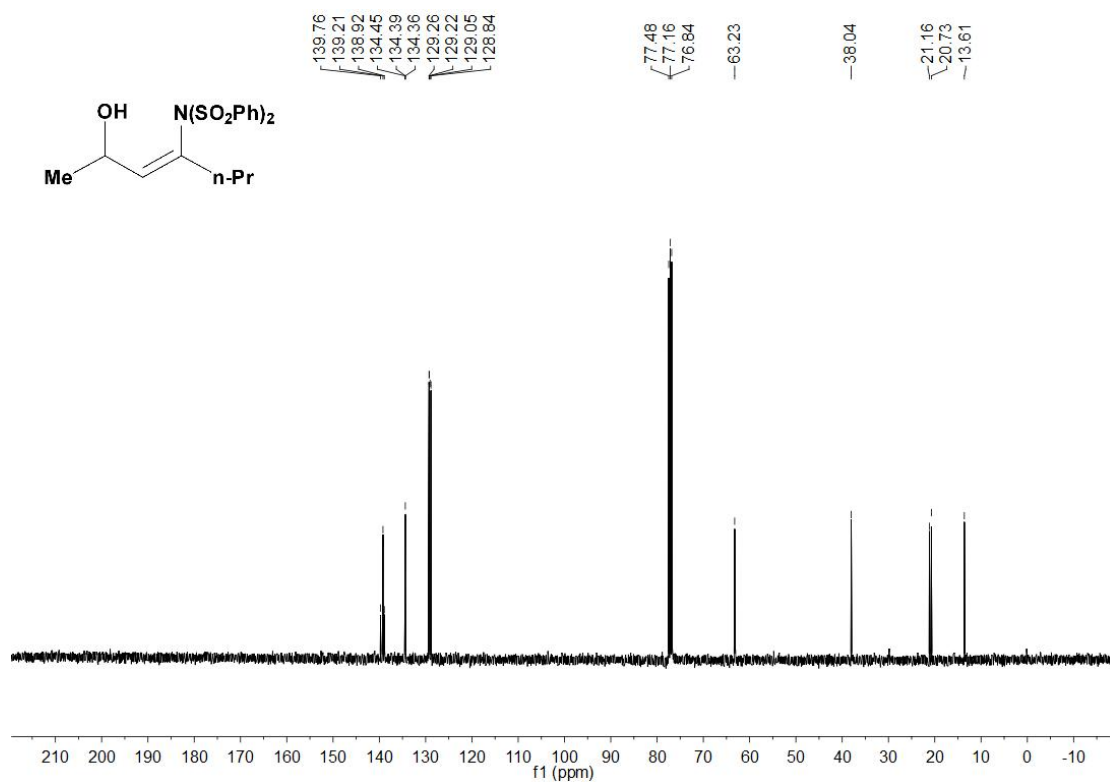

# NMR Spectra of Product (5d)

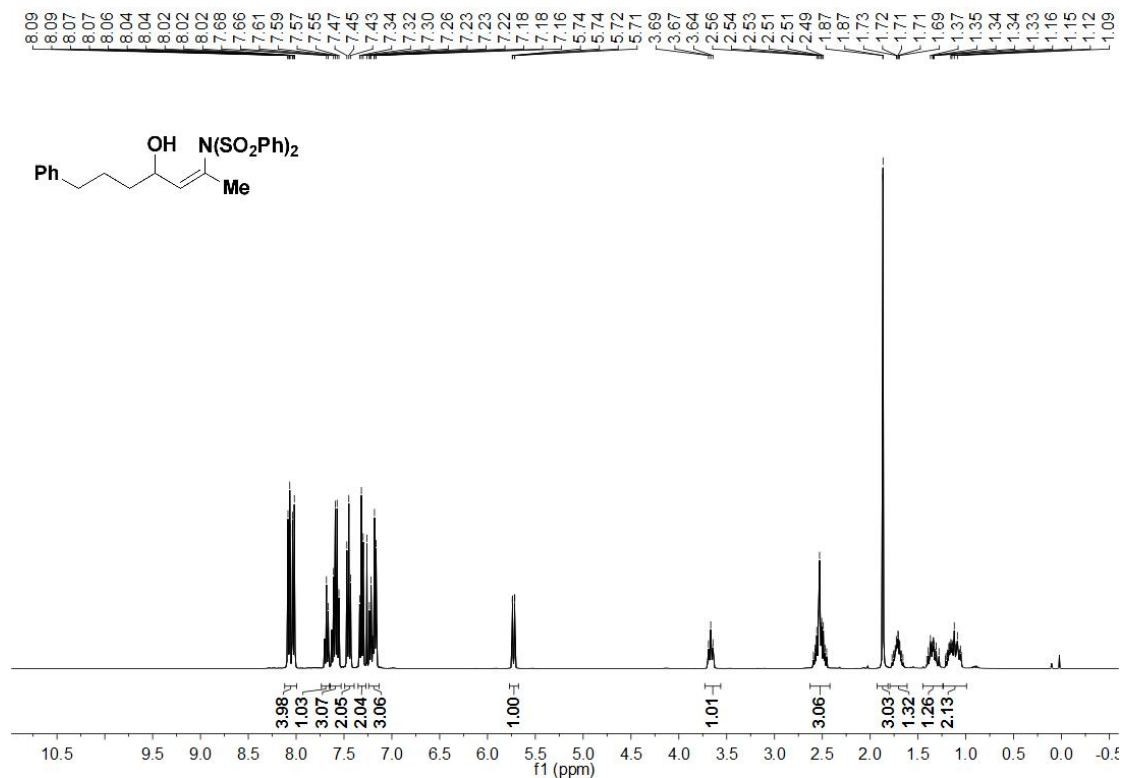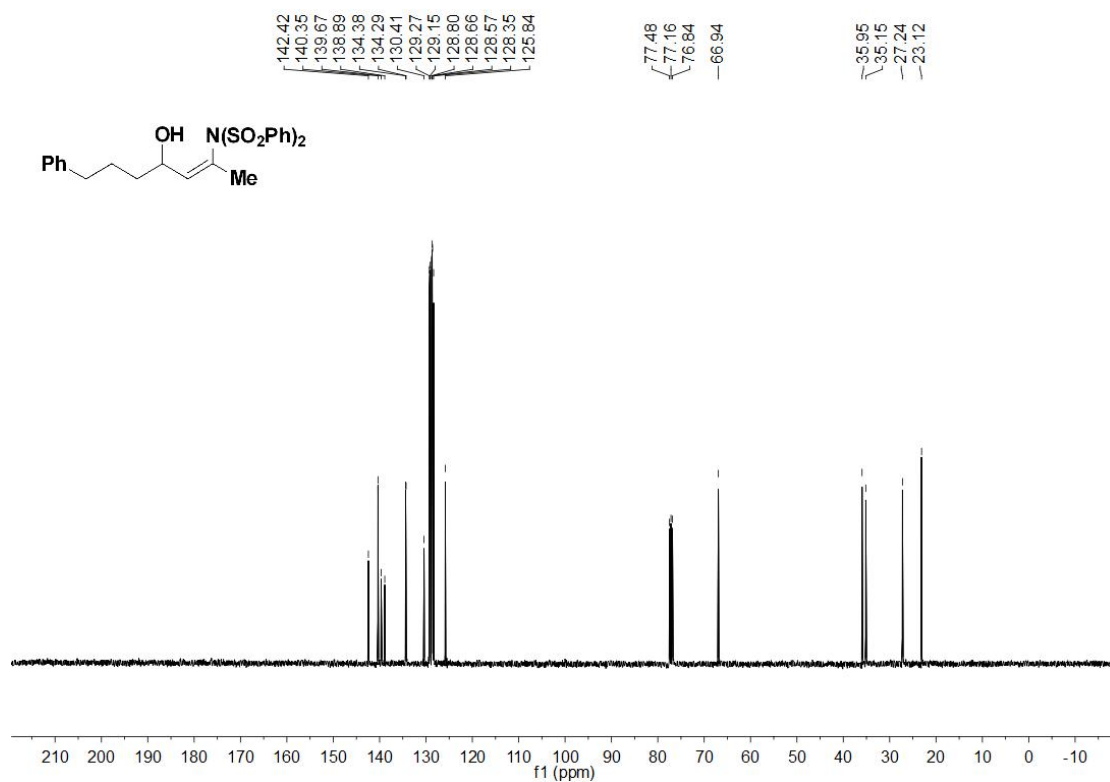

# NMR Spectra of Product (6)

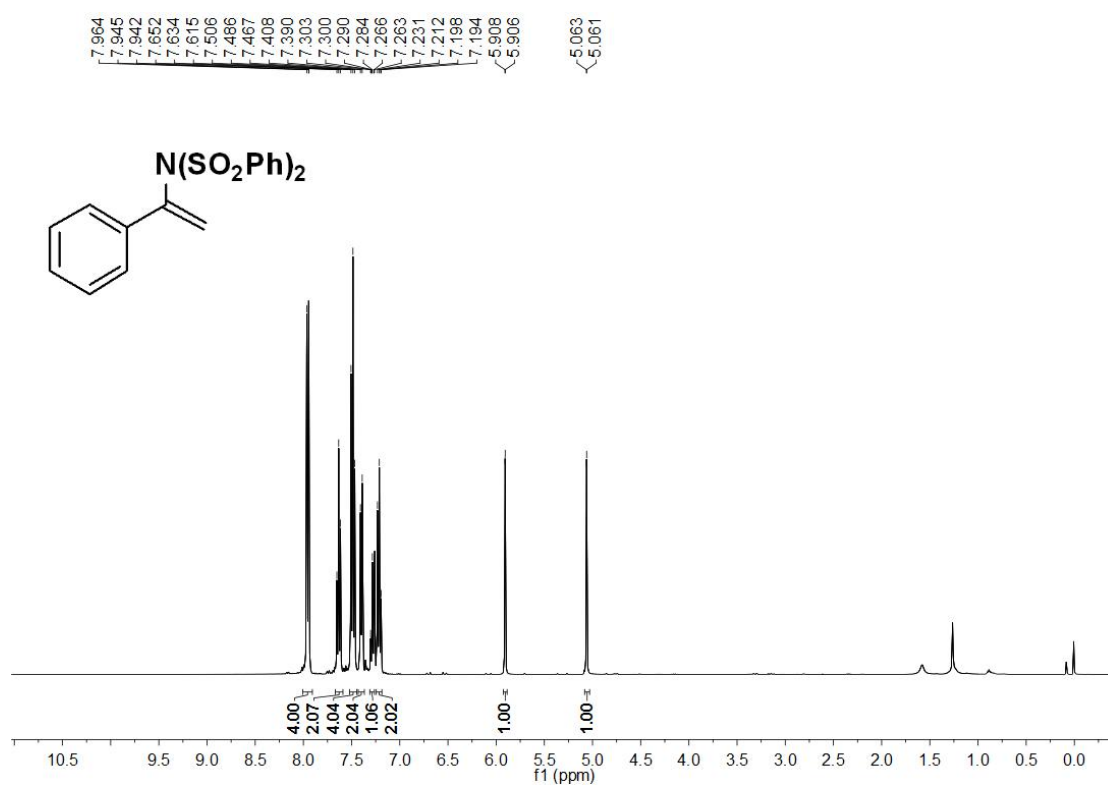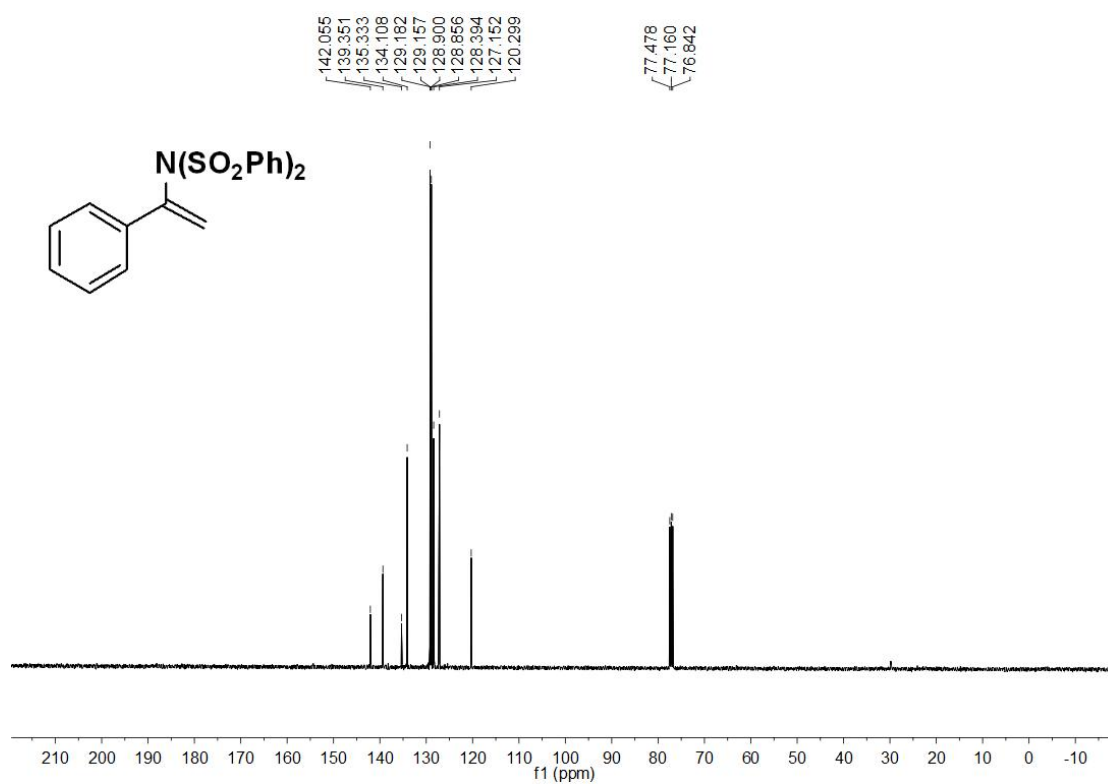

## NMR Spectra of Product (8a)

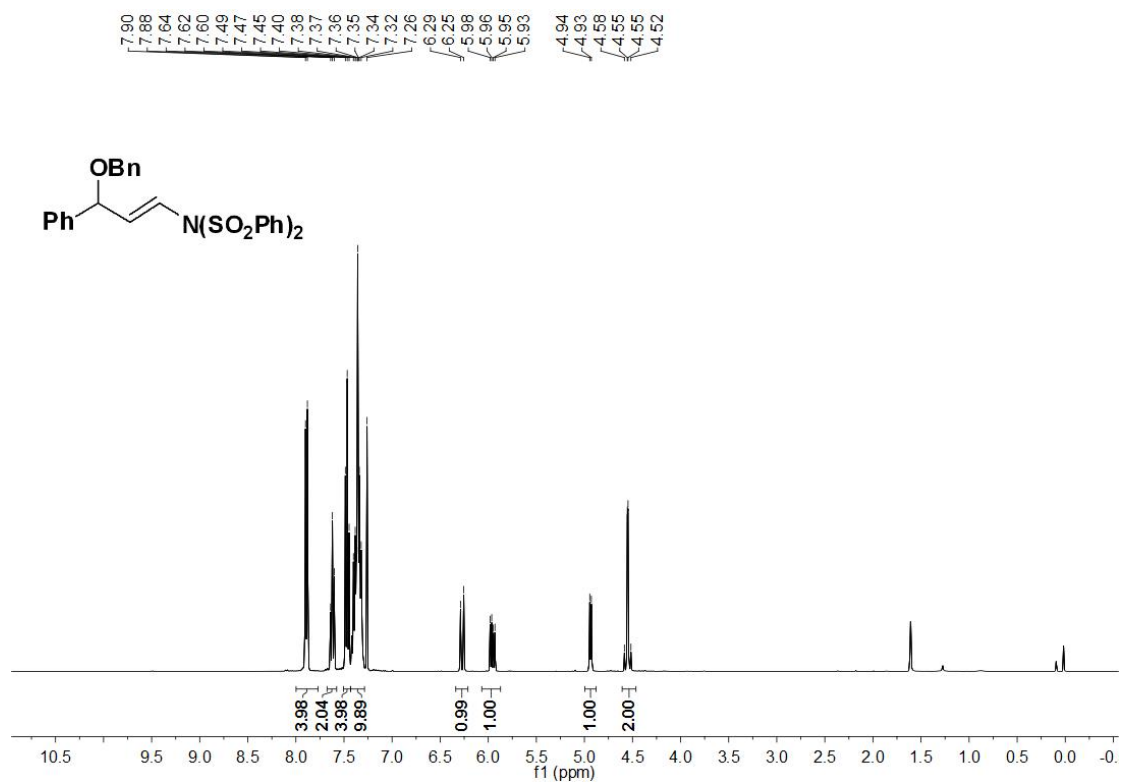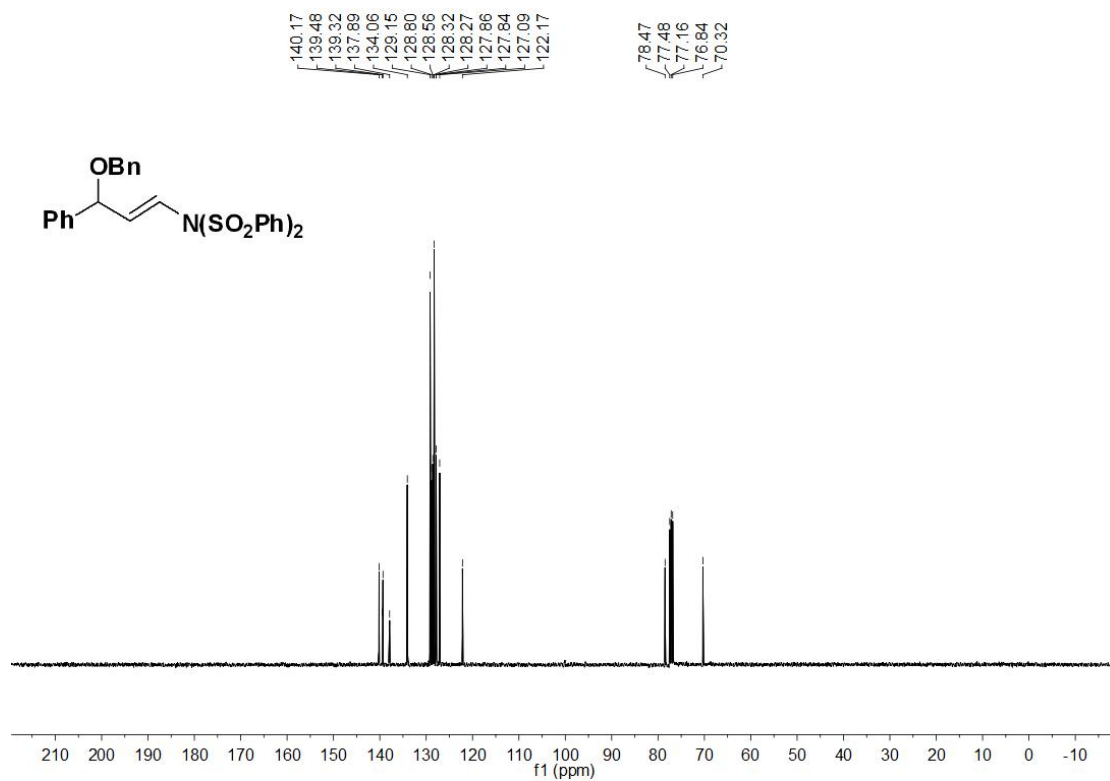

# NMR Spectra of Product (8b)

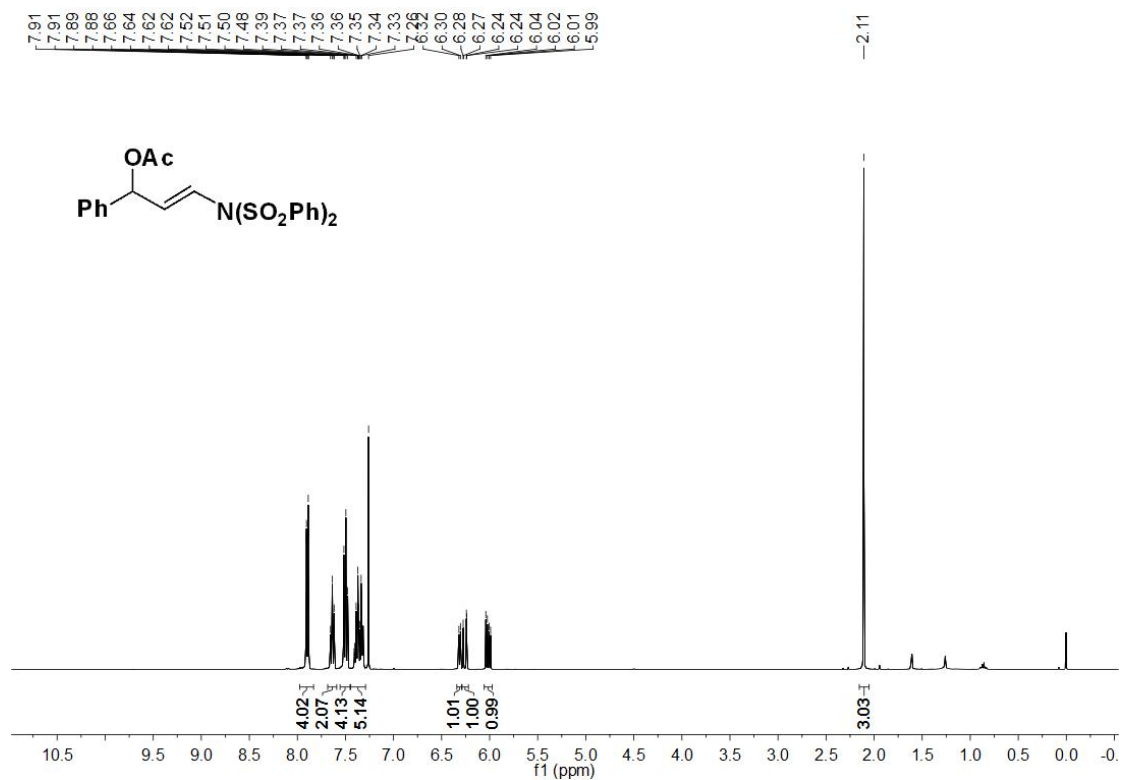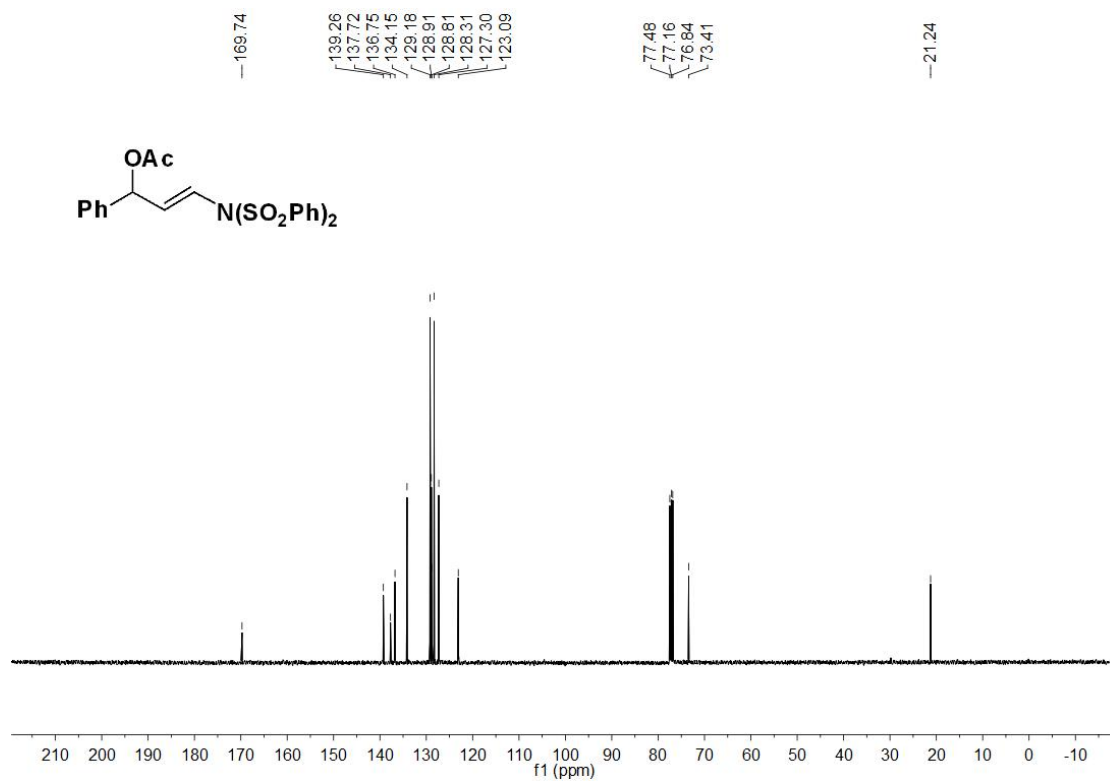

## 9. Proton NMR spectra for 3a-3m

### <sup>1</sup>H NMR Spectrum of Product (3a)

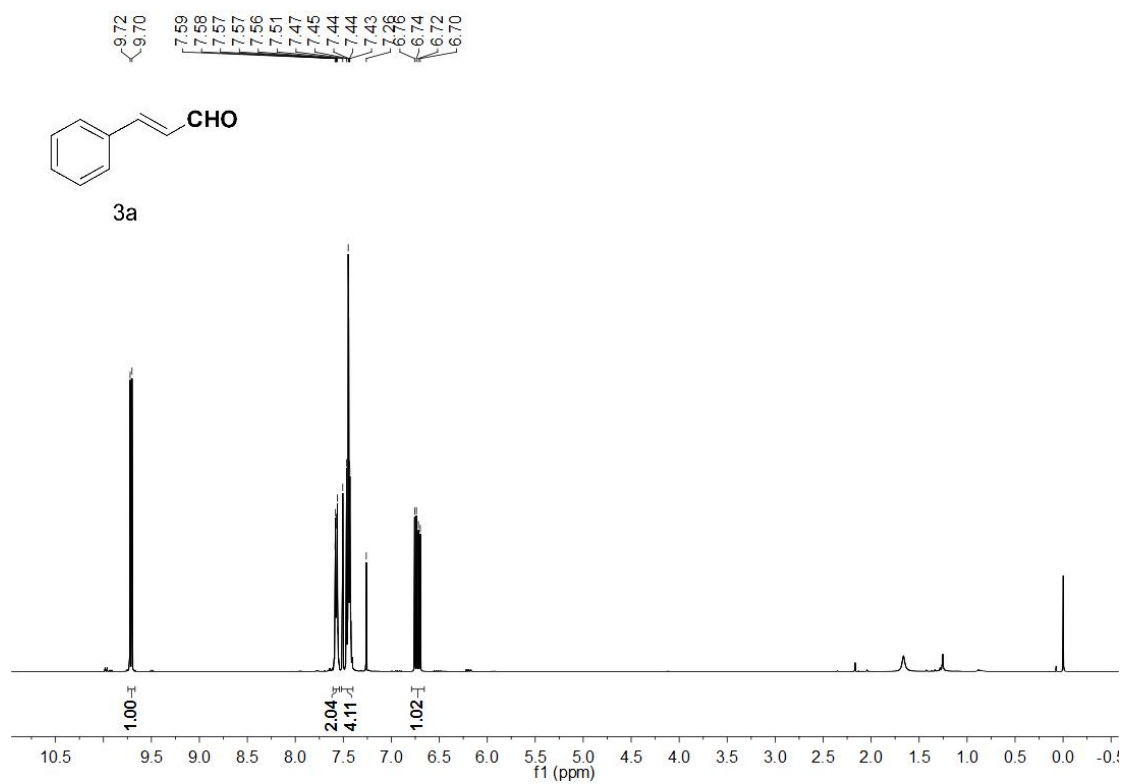

### <sup>1</sup>H NMR Spectrum of Product (3b)

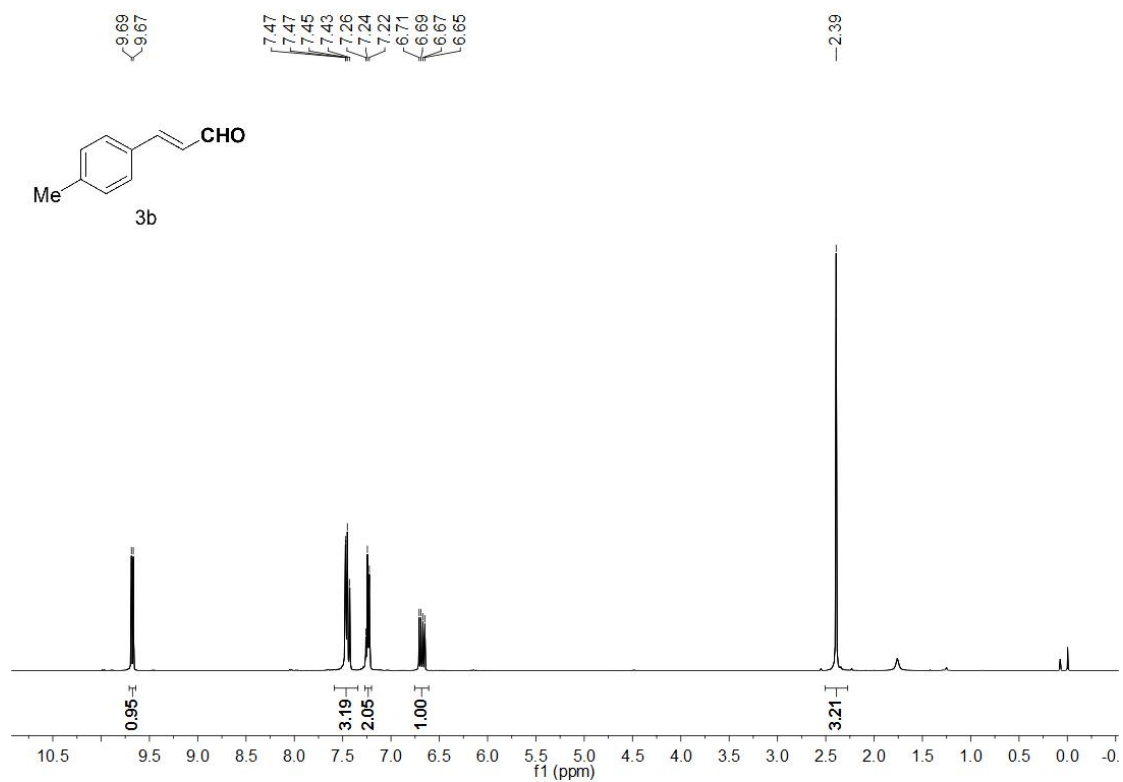

### <sup>1</sup>H NMR Spectrum of Product (3c)

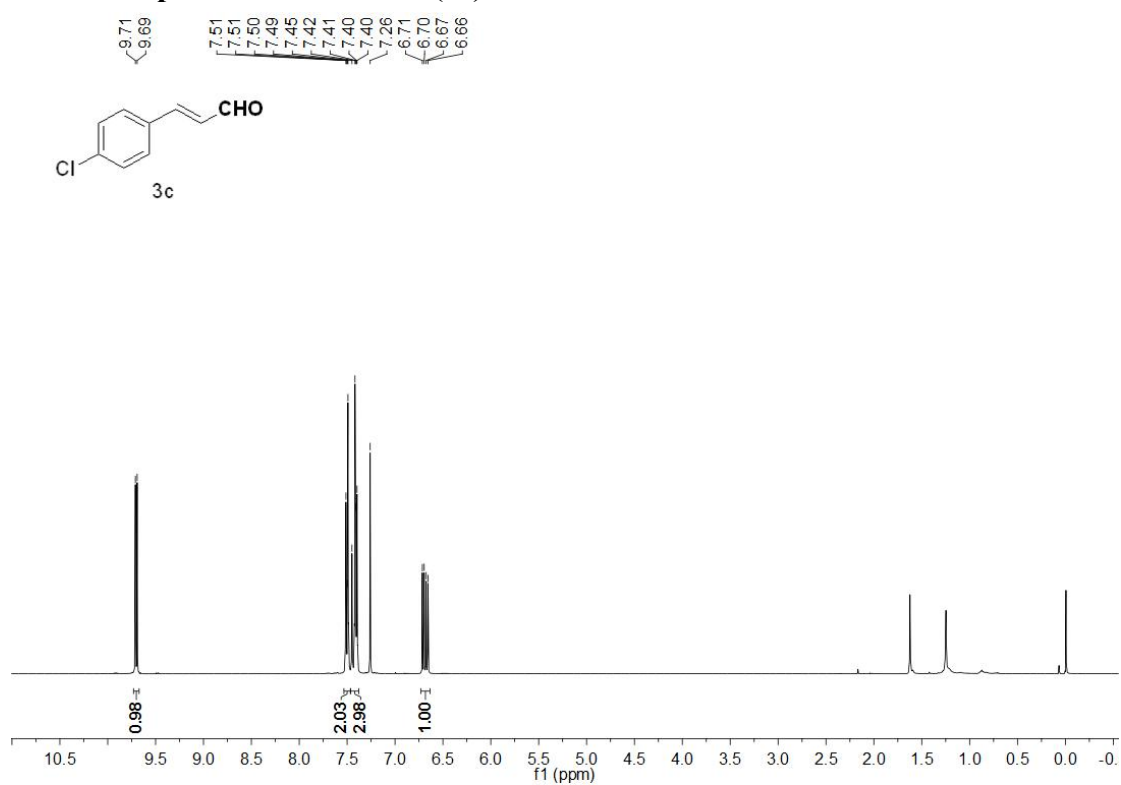

### <sup>1</sup>H NMR Spectrum of Product (3d)

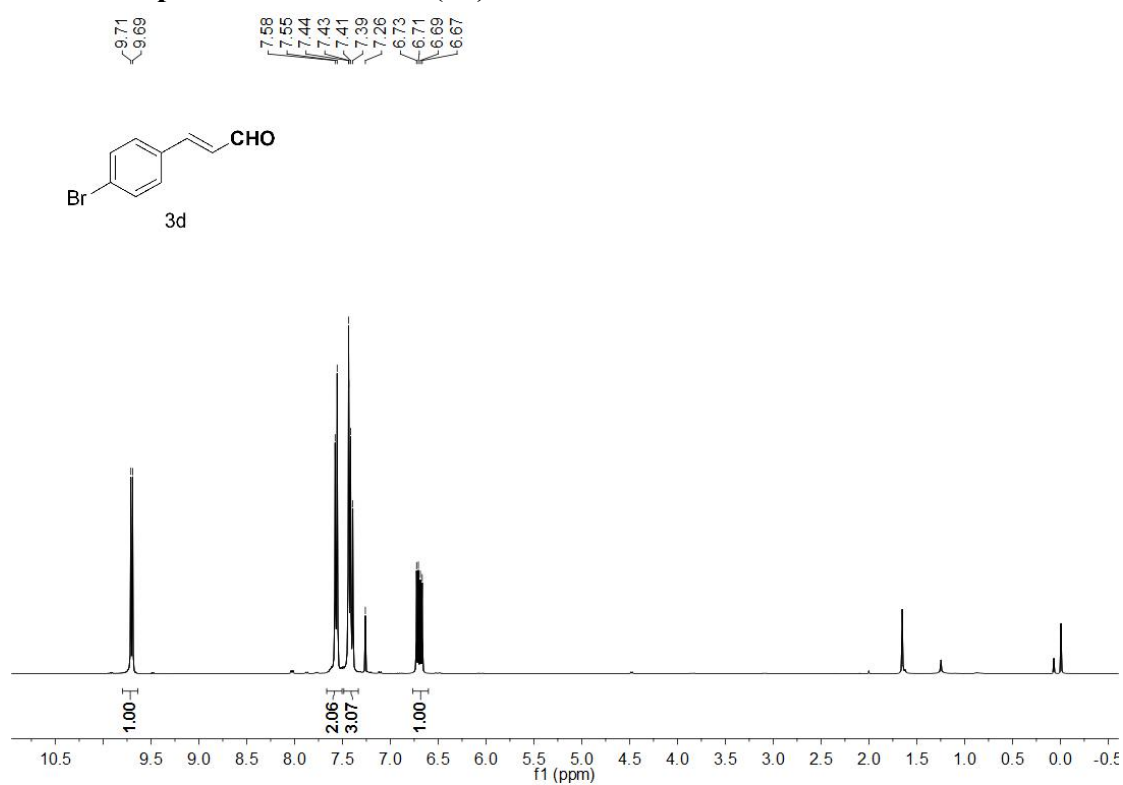



### <sup>1</sup>H NMR Spectrum of Product (3e)

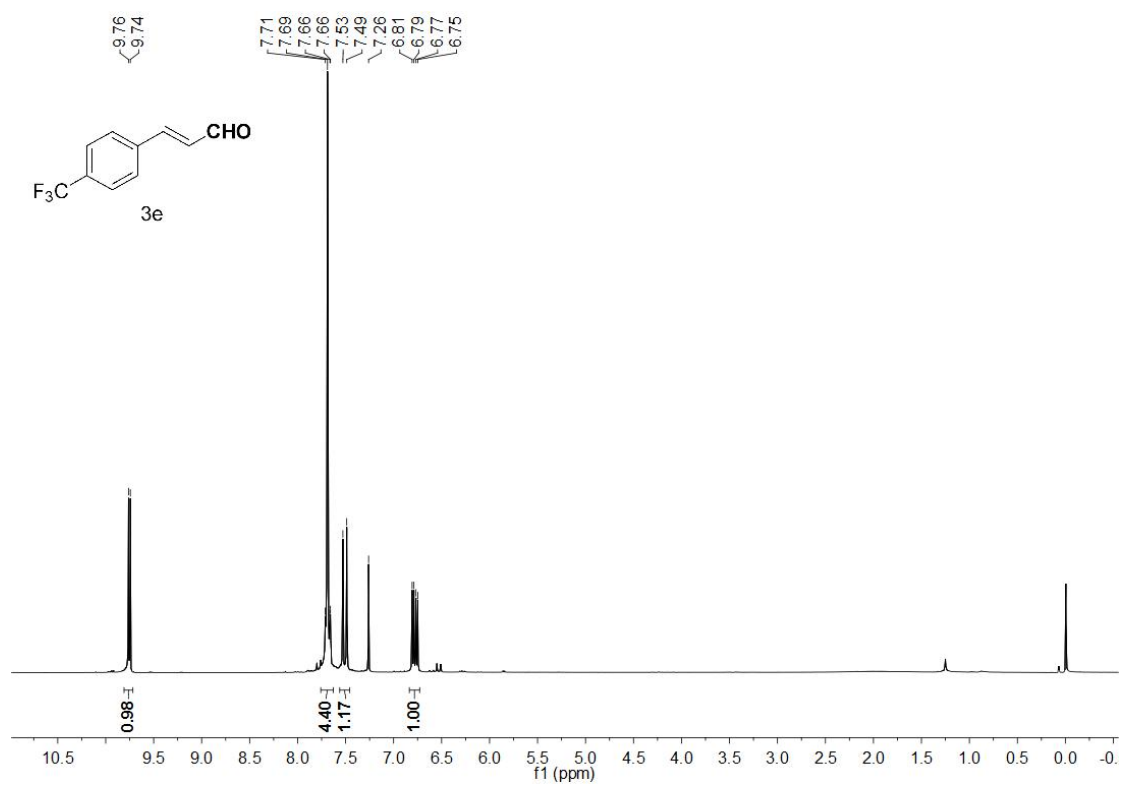

### <sup>1</sup>H NMR Spectrum of Product (3f)

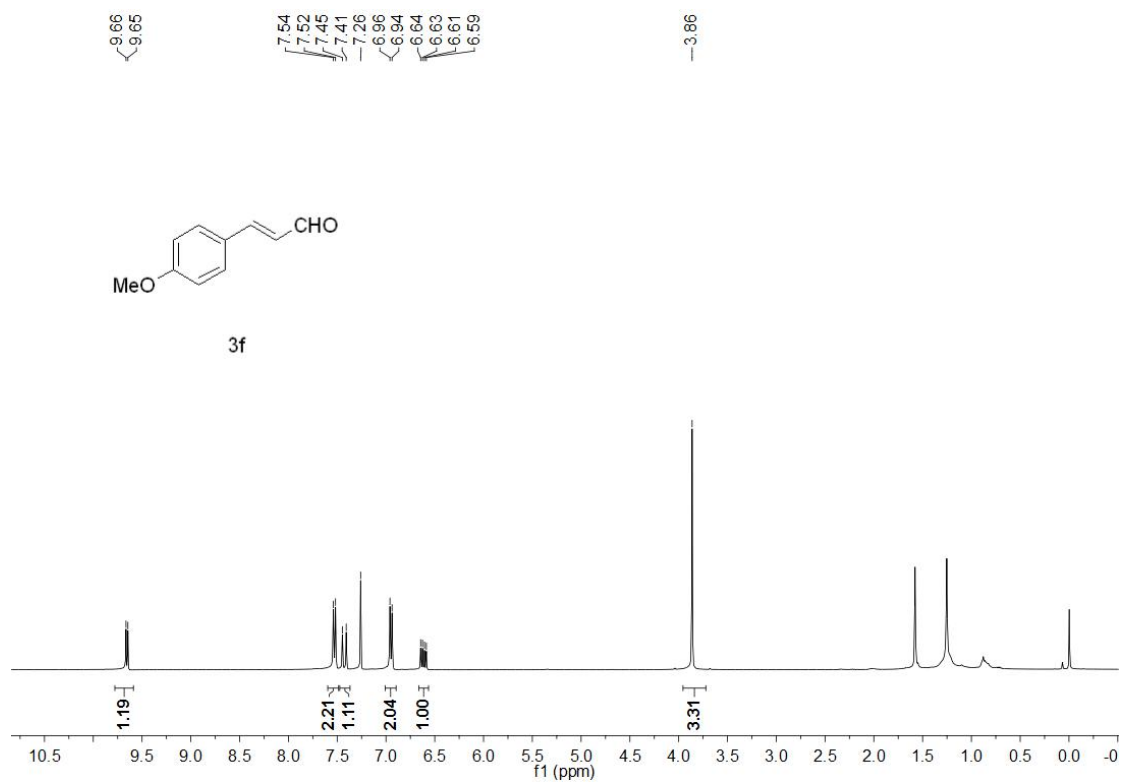

# <sup>1</sup>H NMR Spectrum of Product (3g)

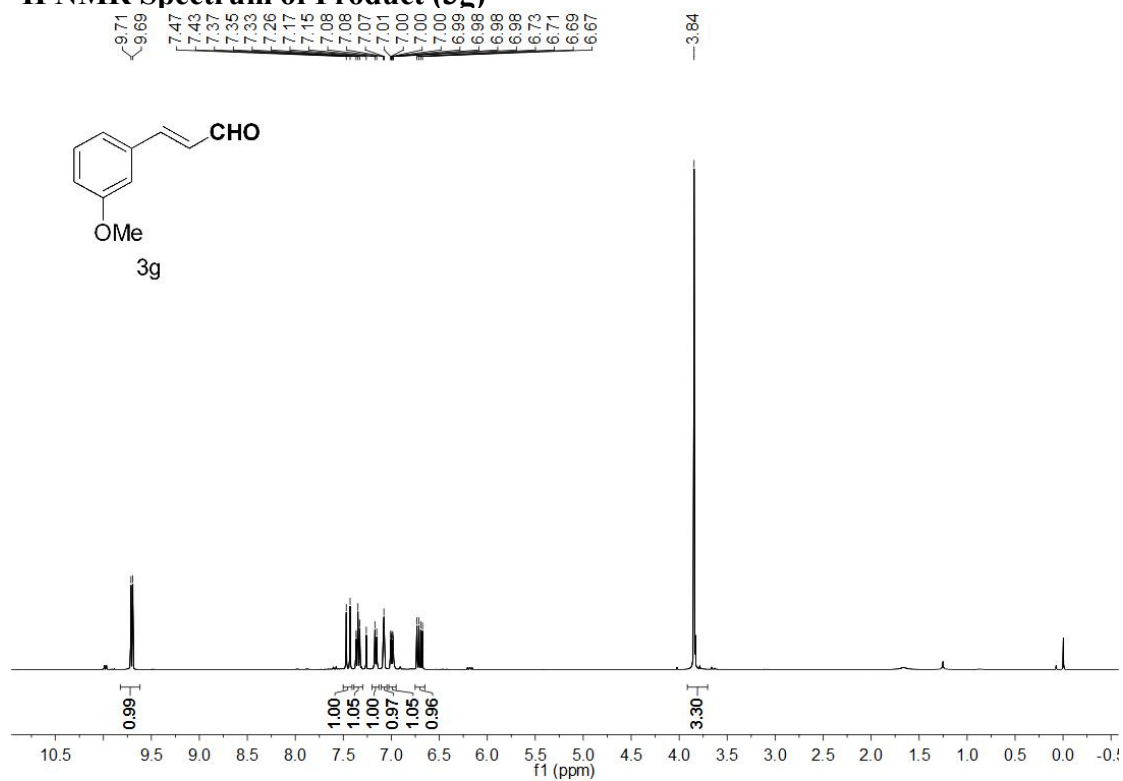

# <sup>1</sup>H NMR Spectrum of Product (3h)

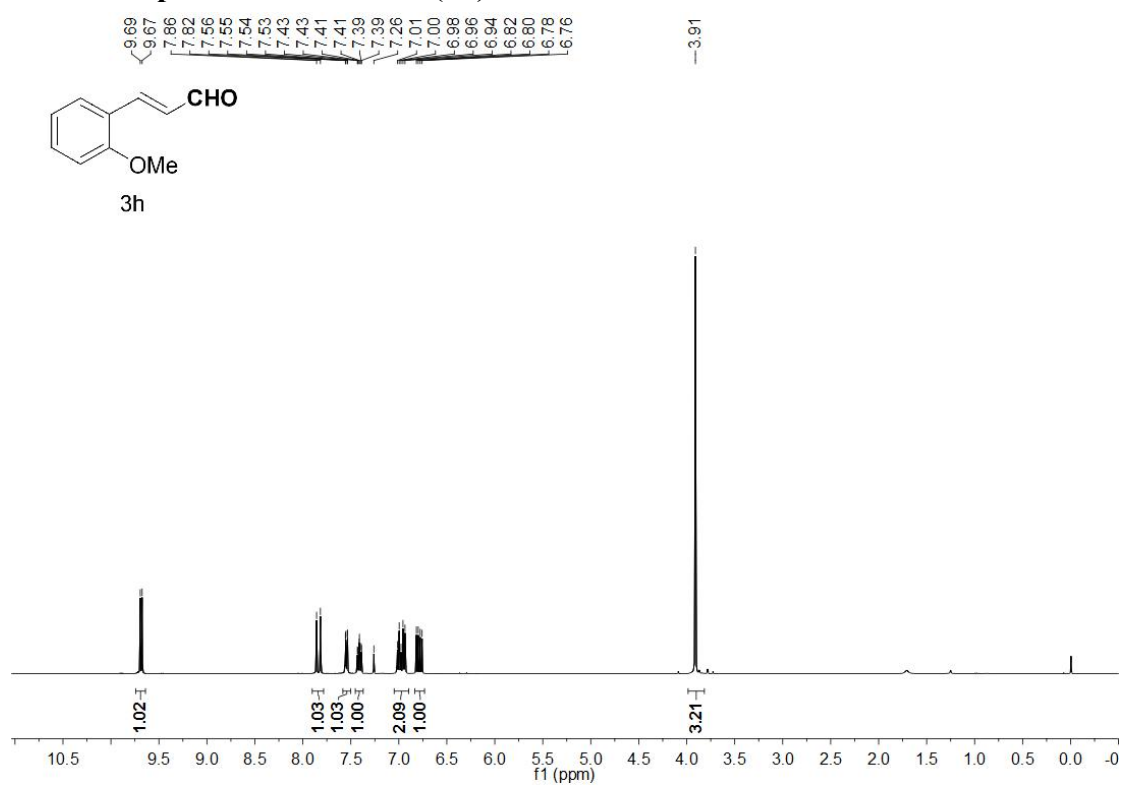

### <sup>1</sup>H NMR Spectrum of Product (3i)

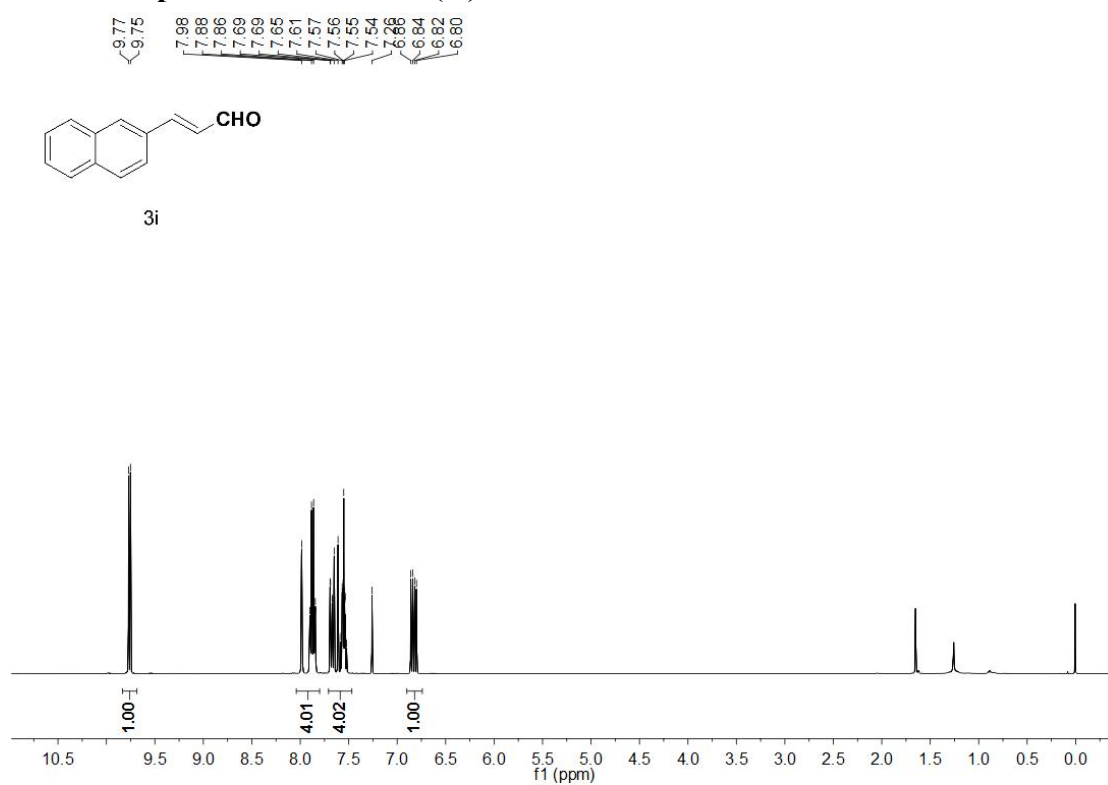

### <sup>1</sup>H NMR Spectrum of Product (3j)

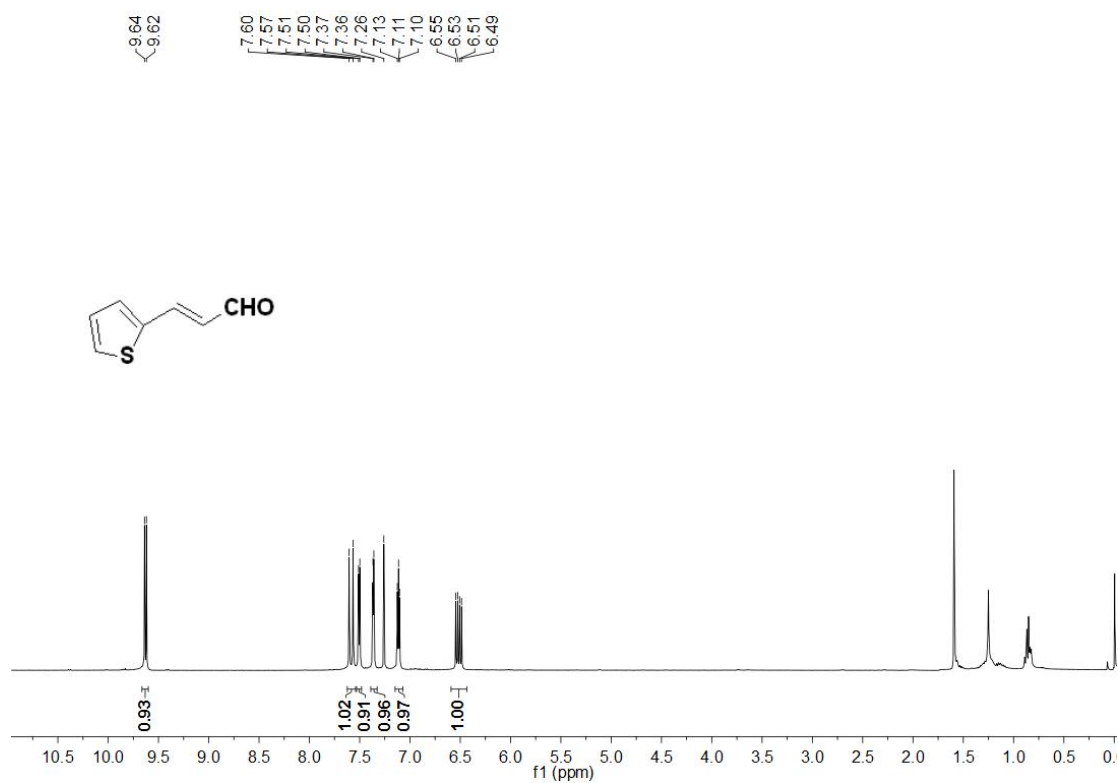

# <sup>1</sup>H NMR Spectrum of Product (3k)

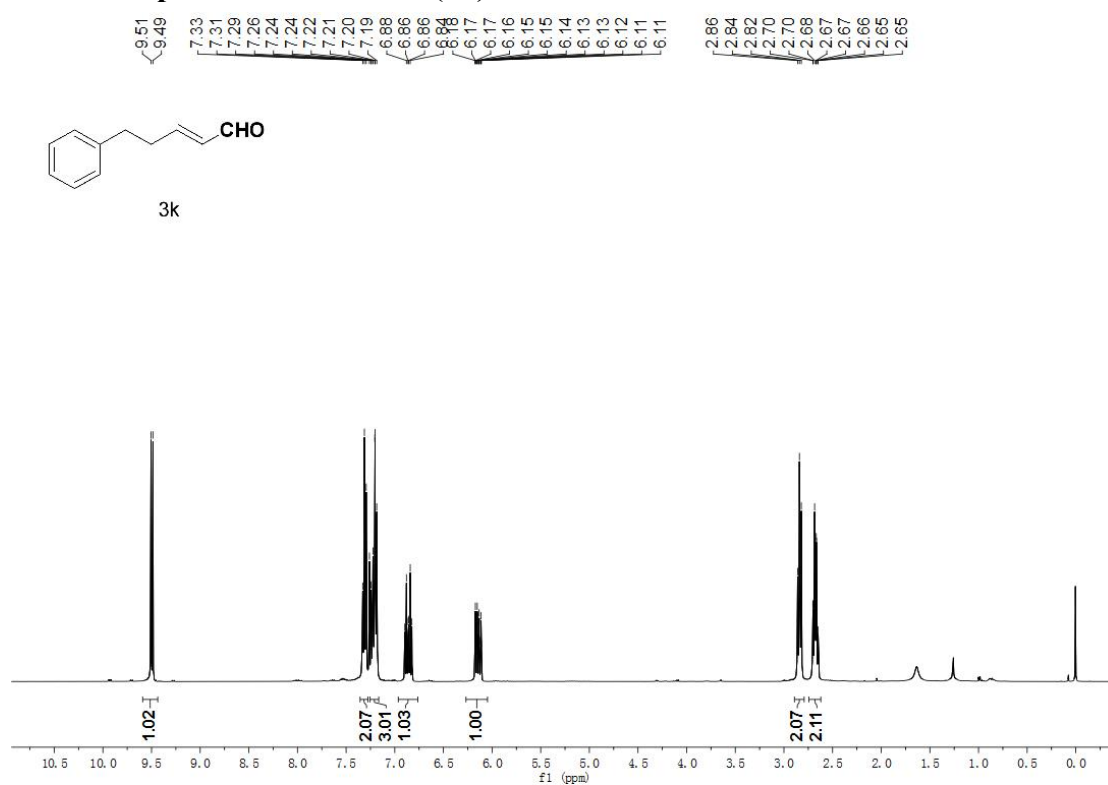

# <sup>1</sup>H NMR Spectrum of Product (3l)

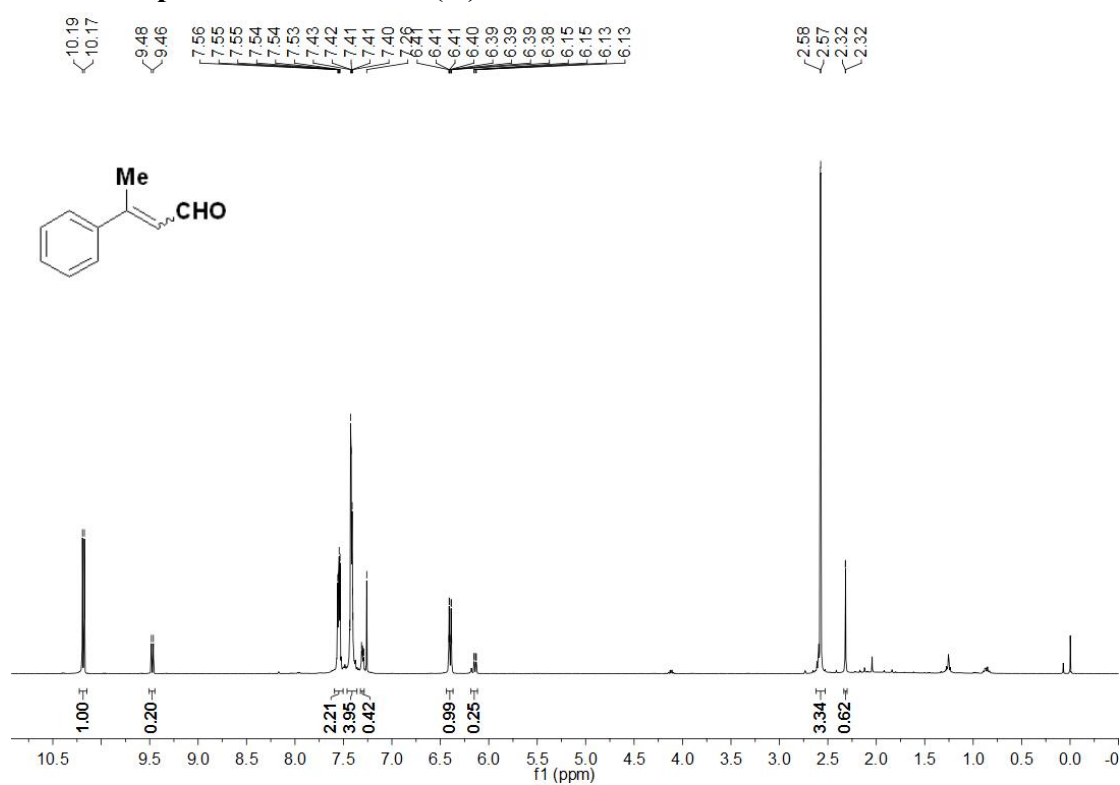

# <sup>1</sup>H NMR Spectrum of Product (3m)

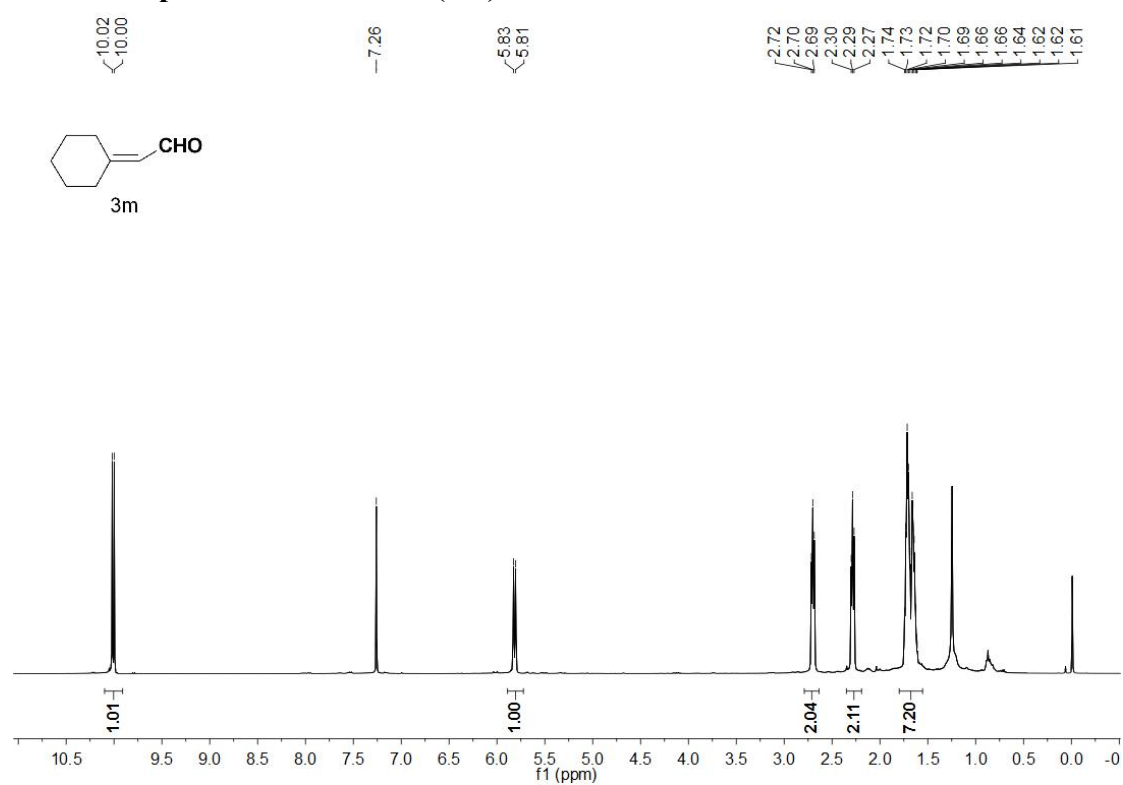

## 10. NMR spectra for amination of the alkenes 9, 13 and 14

### 1) The products of amination of allylbenzene 9

$^1\text{H}$  NMR spectrum of the mixture products after flash column chromatography for amination of allylbenzene **9**:

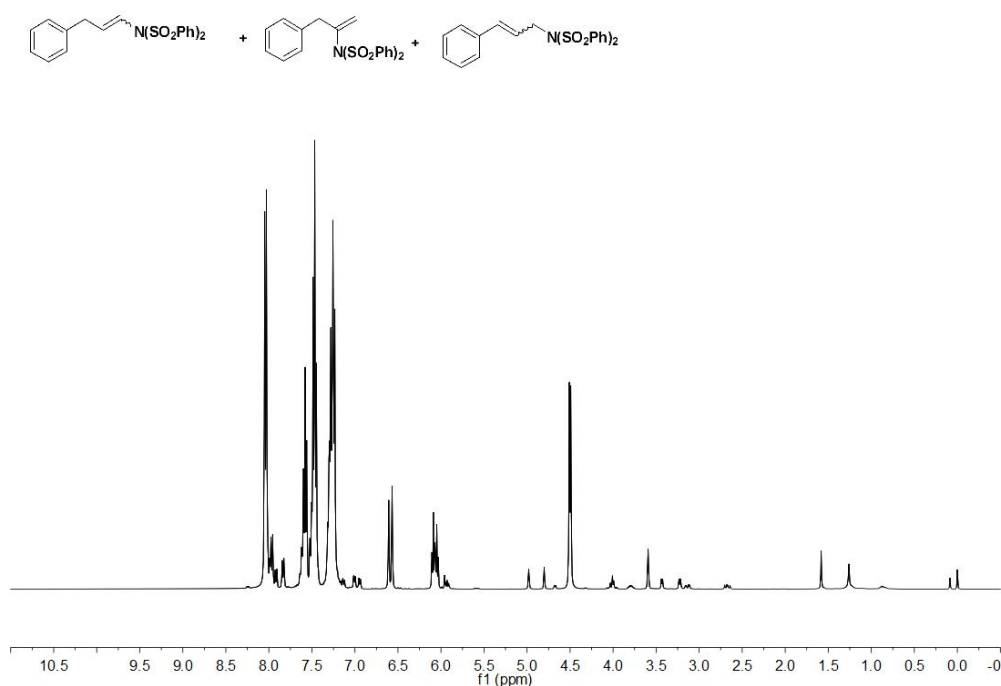

$^1\text{H}$  NMR spectrum of the mixture products after flash column chromatography for amination of allylbenzene **9** using BzOBn as the internal standard:

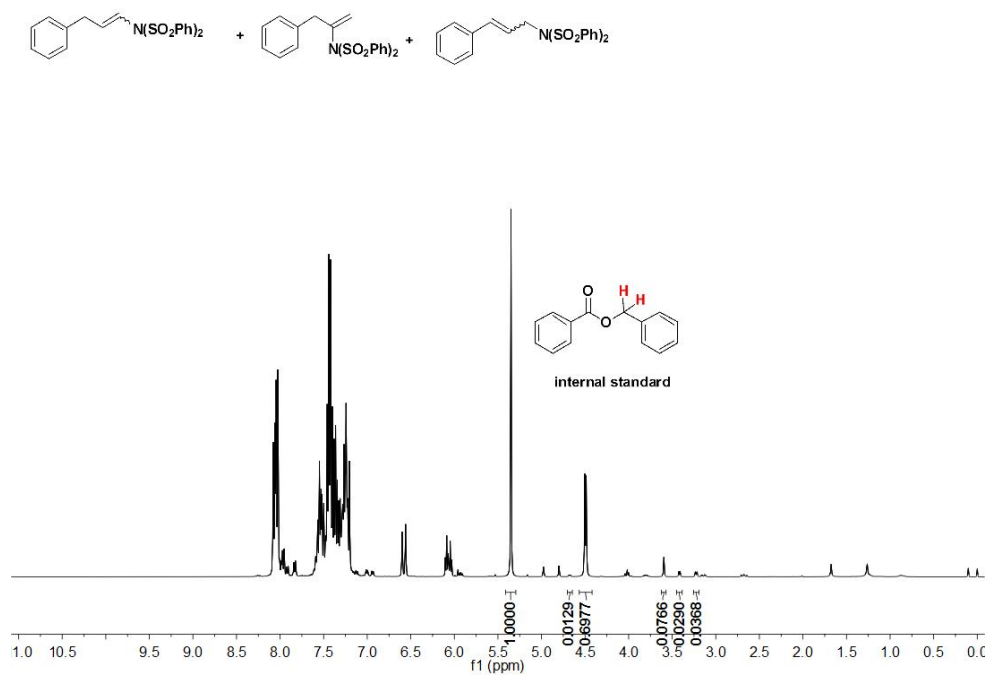

$^1\text{H}$  NMR characteristic peaks of animation products:

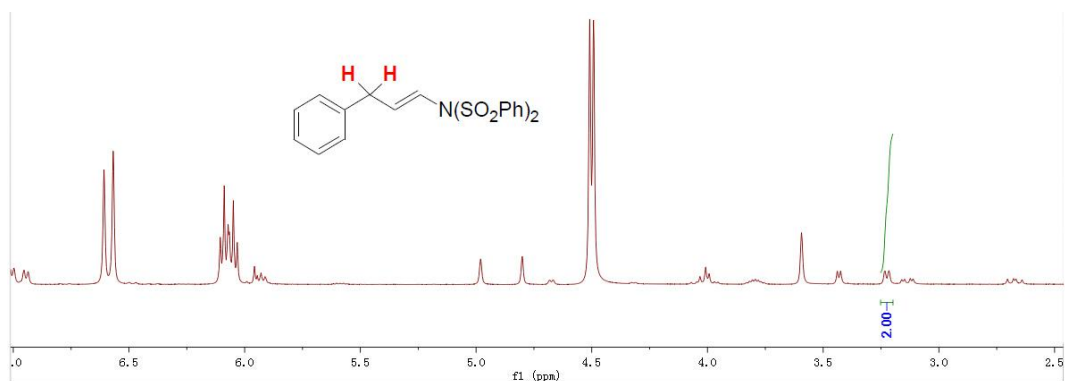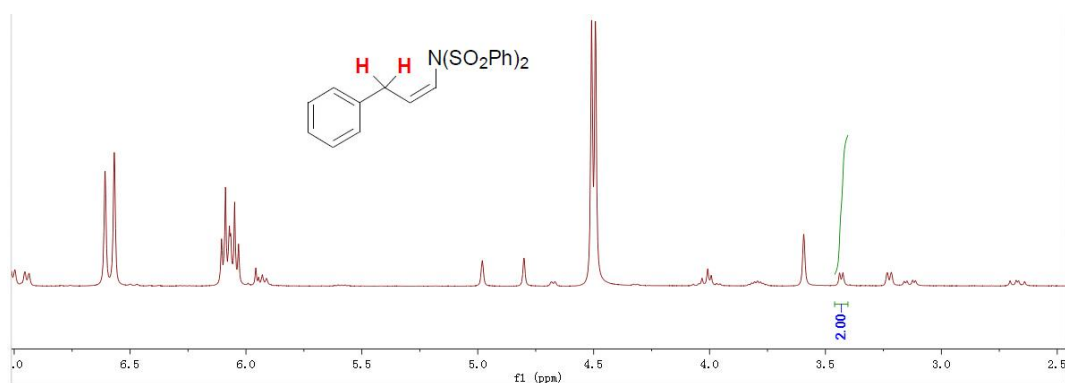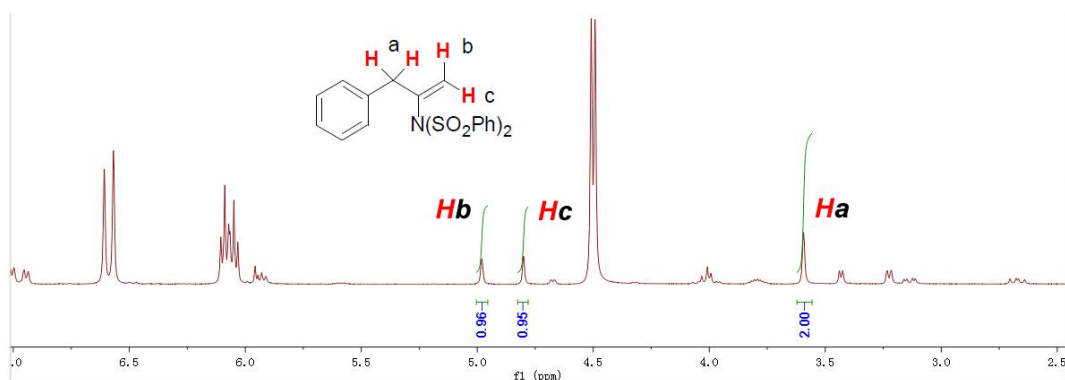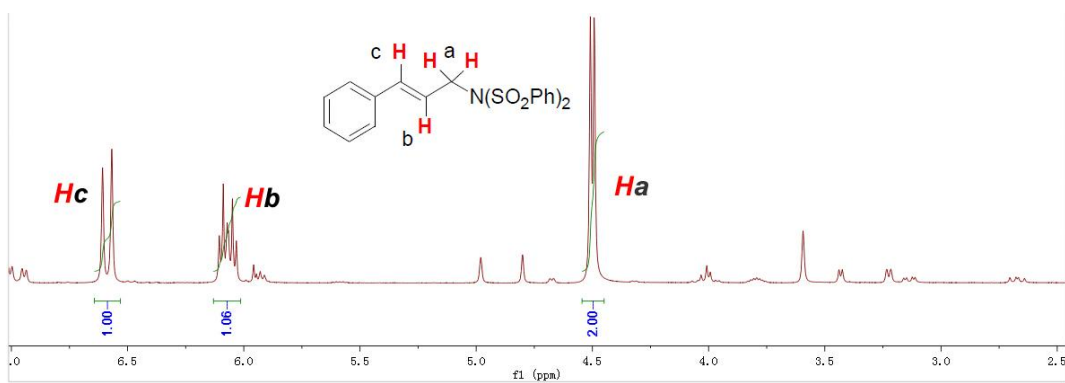

## 2) The products of amination of 3-phenyl-1-butene **13**

$^1\text{H}$  NMR spectra for reaction mixture of 3-phenyl-1-butene **13** after flash column chromatography:

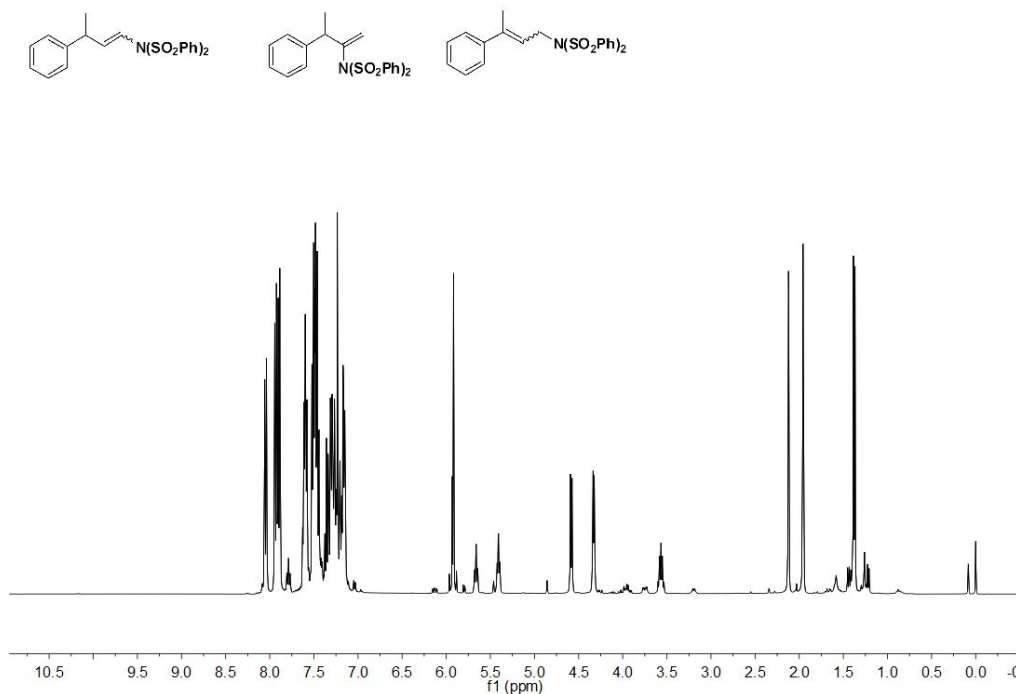

$^1\text{H}$  NMR spectra for reaction mixture of 3-phenyl-1-butene **13** after flash column chromatography using BzOBn as the internal standard:

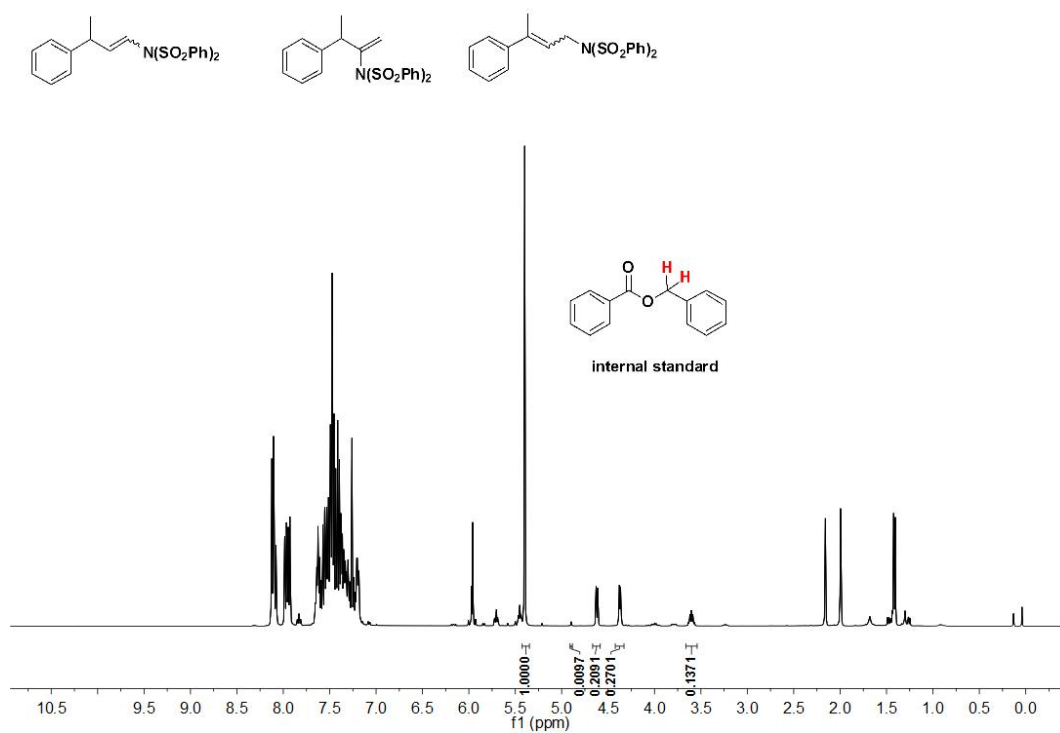



$^1\text{H}$  NMR characteristic peaks of animation products of 3-phenyl-1-butene **13**:

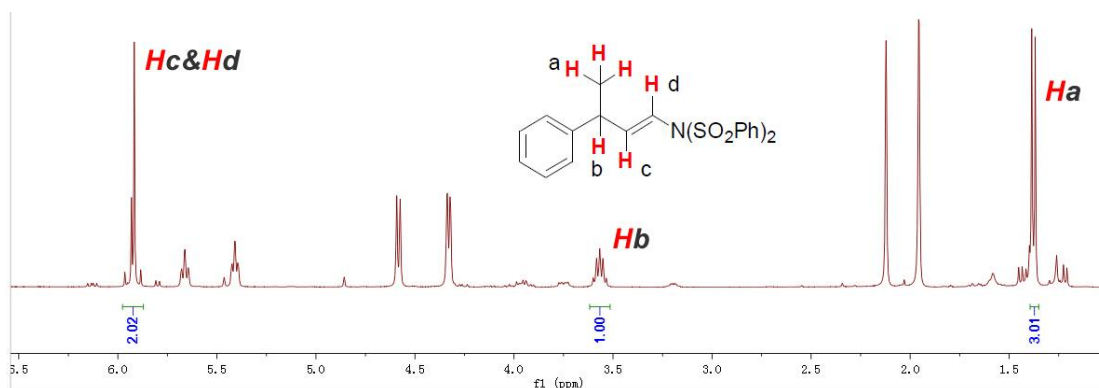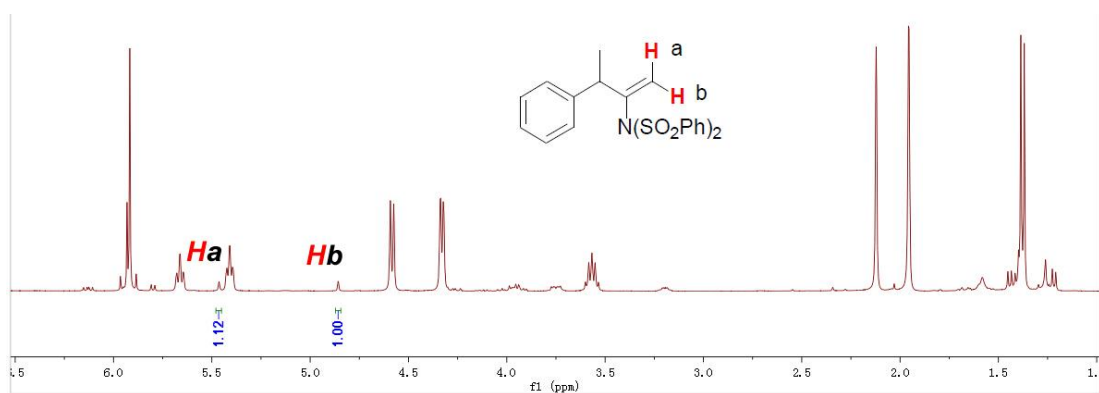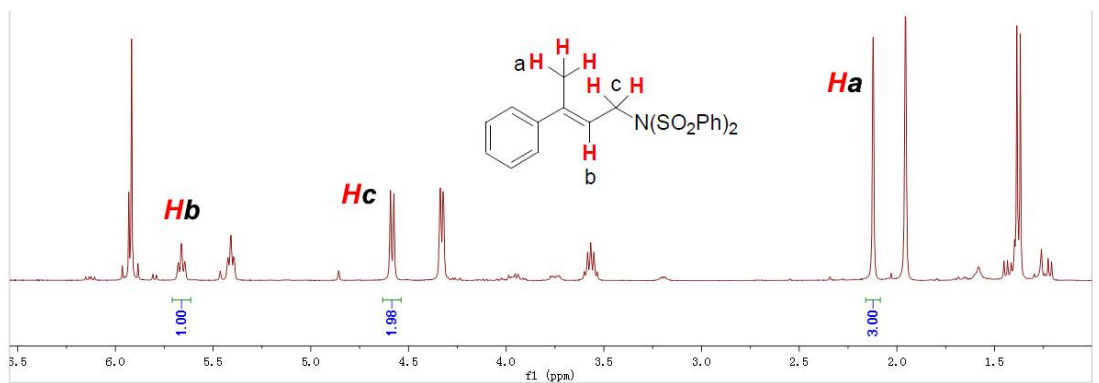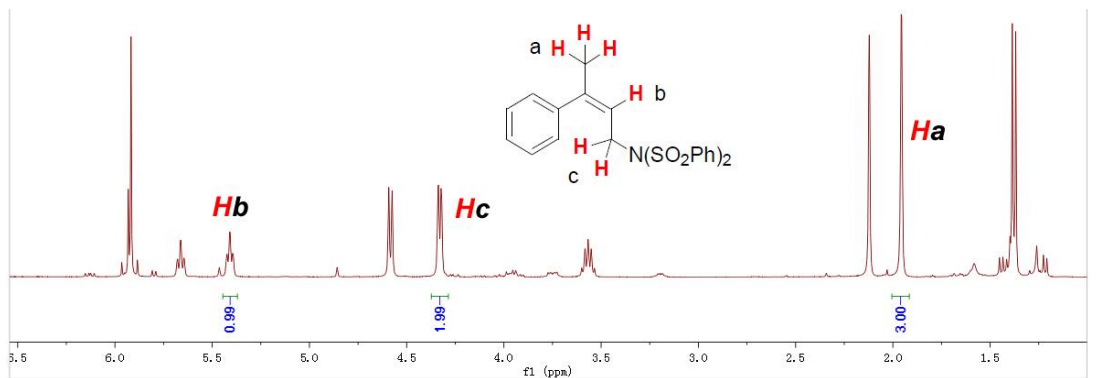

### 3) The products of amination of hex-1-ene **14**:

$^1\text{H}$  NMR spectra for all amination products of hex-1-ene **14**:

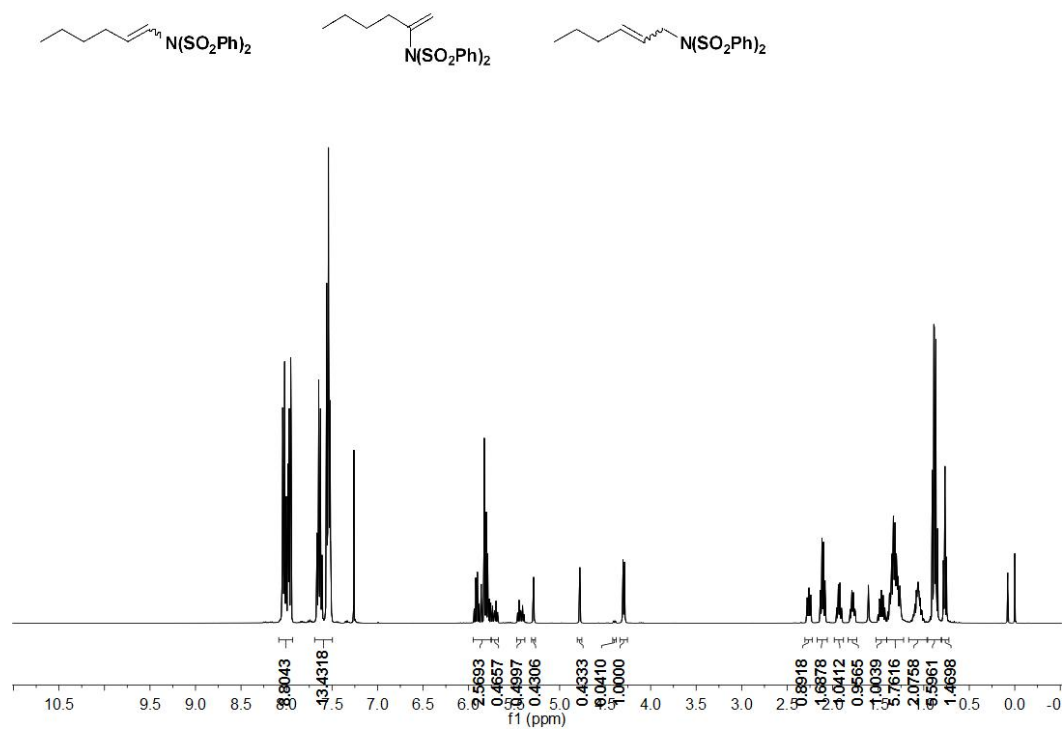

$^{13}\text{C}$  NMR spectra for all amination products of hex-1-ene **14**:

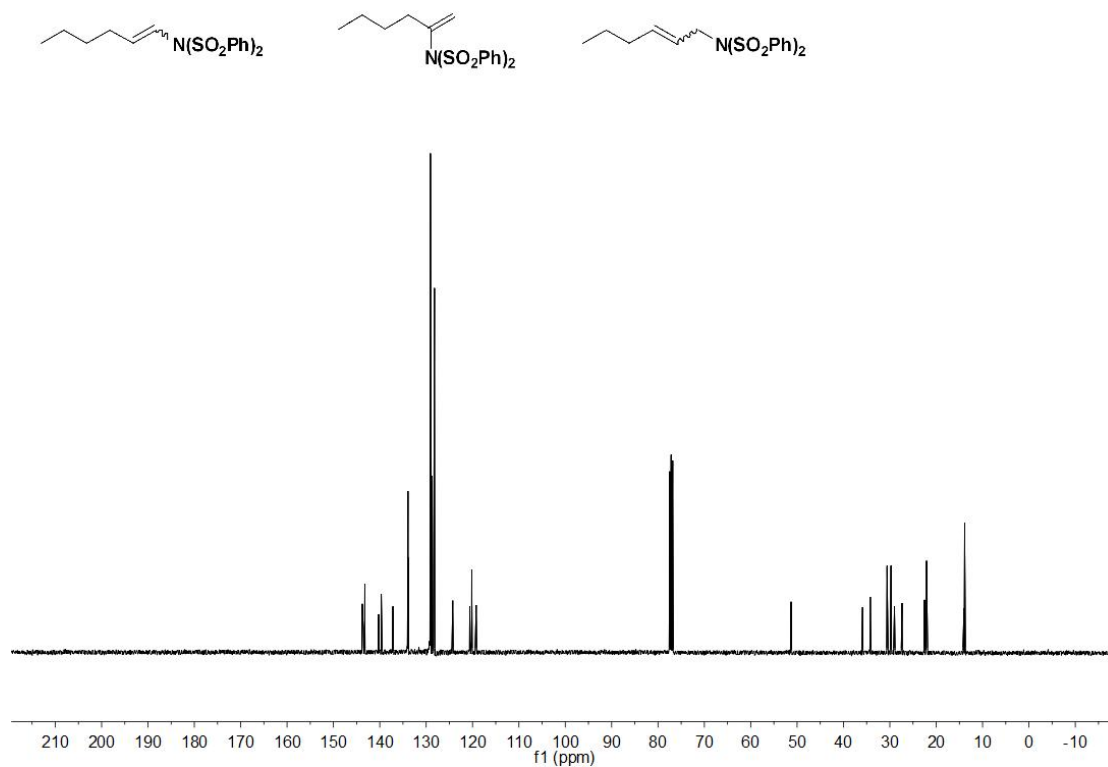

$^1\text{H}$  NMR characteristic peaks of each amination product of hex-1-ene **14**:

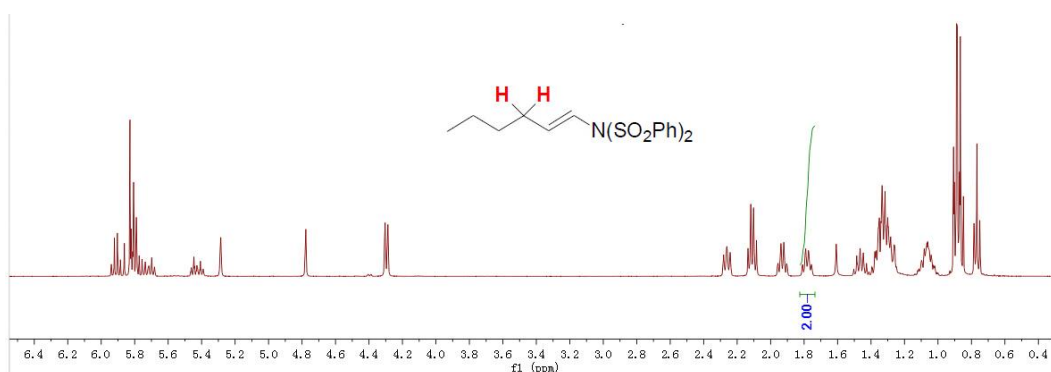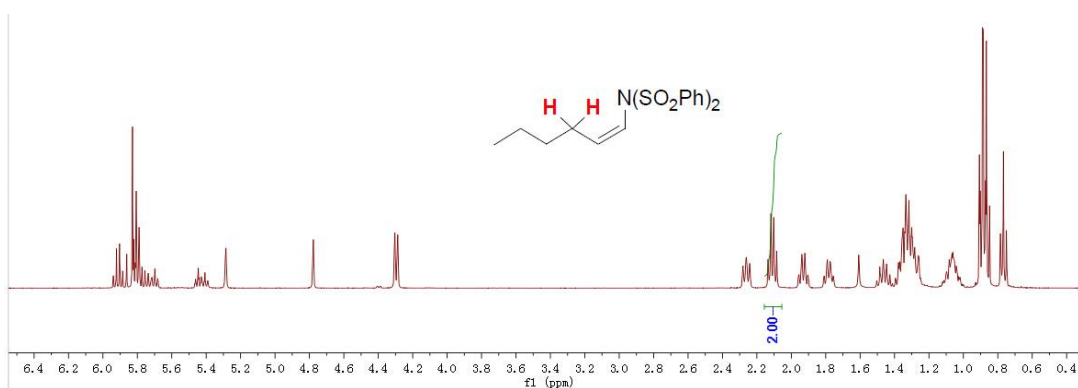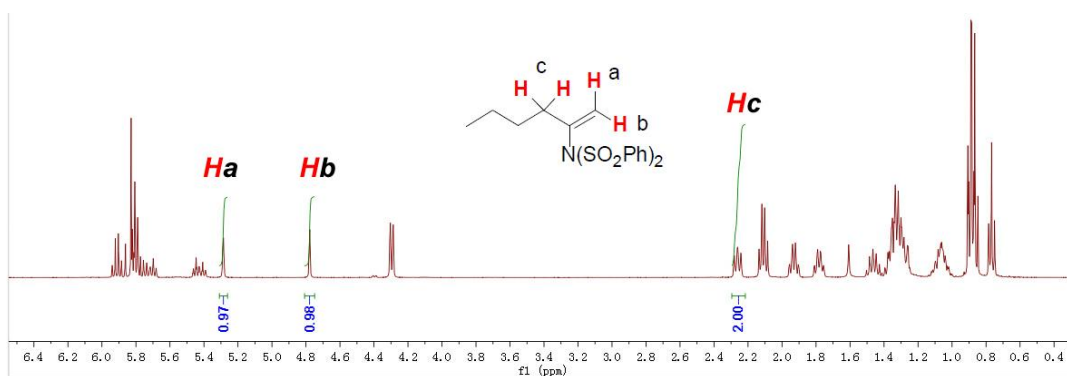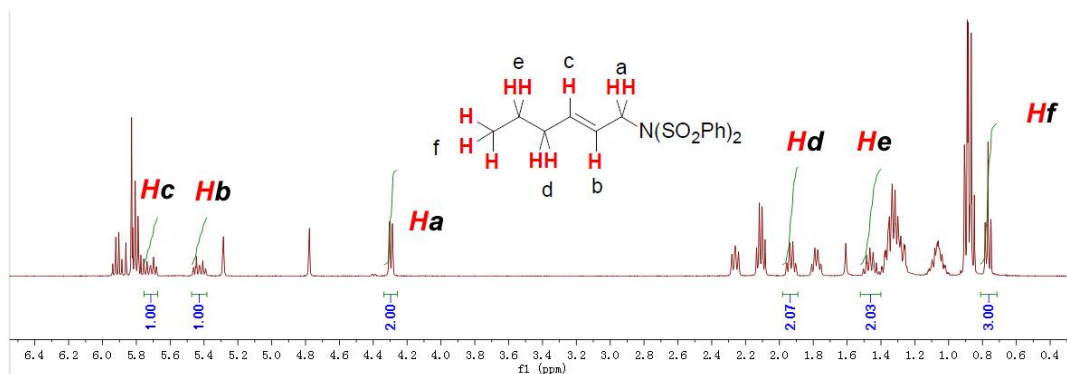

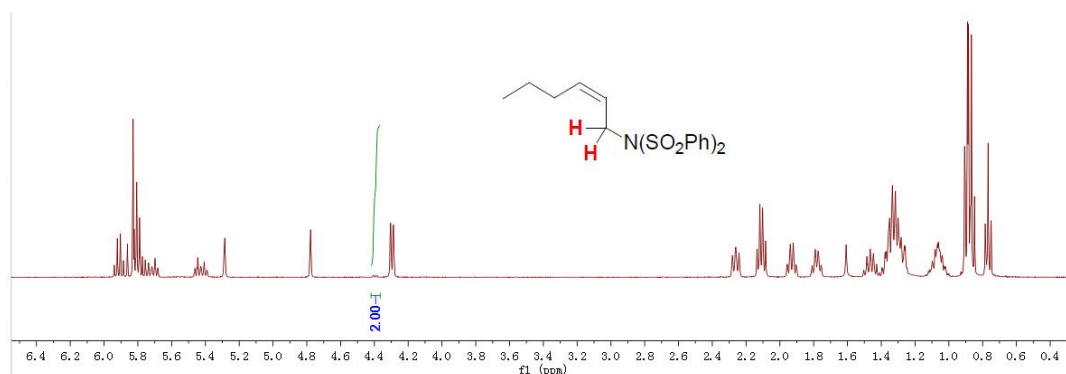

## 11. Data for X-ray single crystal structure of **5c**

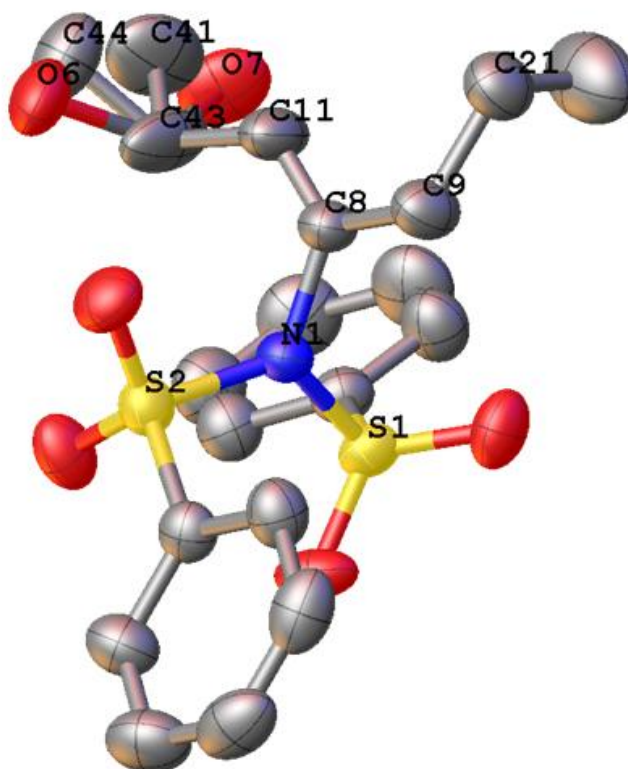

Gray ball stands for carbon atom; yellow ball stands for sulfur atom; blue ball stands for nitrogen atom; red ball stands for oxygen atom. Because the racemic mixture was used, the methyl group and the propenyl group are in disorder and occupy in C44/C41 and O07/O06 with 50% possibility, respectively.

**Table S2** Crystal data and structure refinement for **5c** (exp\_19725).

|                                             |                                                                |
|---------------------------------------------|----------------------------------------------------------------|
| Identification code                         | exp_19725                                                      |
| Empirical formula                           | C <sub>19</sub> H <sub>23</sub> NO <sub>5</sub> S <sub>2</sub> |
| Formula weight                              | 404.49                                                         |
| Temperature/K                               | 293.35(10)                                                     |
| Crystal system                              | triclinic                                                      |
| Space group                                 | P-1                                                            |
| a/Å                                         | 7.9459(4)                                                      |
| b/Å                                         | 8.3713(5)                                                      |
| c/Å                                         | 15.0845(6)                                                     |
| α/°                                         | 98.477(4)                                                      |
| β/°                                         | 91.135(4)                                                      |
| γ/°                                         | 97.754(5)                                                      |
| Volume/Å <sup>3</sup>                       | 982.54(9)                                                      |
| Z                                           | 2                                                              |
| ρ <sub>calc</sub> /g/cm <sup>3</sup>        | 1.3671                                                         |
| μ/mm <sup>-1</sup>                          | 0.300                                                          |
| F(000)                                      | 422.7                                                          |
| Crystal size/mm <sup>3</sup>                | 0.1 × 0.08 × 0.08                                              |
| Radiation                                   | Mo Kα (λ = 0.71073)                                            |
| 2Θ range for data collection/°              | 5.76 to 52                                                     |
| Index ranges                                | -10 ≤ h ≤ 10, -10 ≤ k ≤ 10, -19 ≤ l ≤ 9                        |
| Reflections collected                       | 6194                                                           |
| Independent reflections                     | 3842 [R <sub>int</sub> = 0.0194, R <sub>sigma</sub> = 0.0418]  |
| Data/restraints/parameters                  | 3842/0/262                                                     |
| Goodness-of-fit on F <sup>2</sup>           | 1.071                                                          |
| Final R indexes [I ≥ 2σ (I)]                | R <sub>1</sub> = 0.0560, wR <sub>2</sub> = 0.1359              |
| Final R indexes [all data]                  | R <sub>1</sub> = 0.0703, wR <sub>2</sub> = 0.1442              |
| Largest diff. peak/hole / e Å <sup>-3</sup> | 0.57/-0.37                                                     |

**Table S3** Fractional Atomic Coordinates (×10<sup>4</sup>) and Equivalent Isotropic Displacement Parameters (Å<sup>2</sup>×10<sup>3</sup>) for **5c** (exp\_19725). U<sub>eq</sub> is defined as 1/3 of the trace of the orthogonalised U<sub>ij</sub> tensor.

| Atom | x         | y         | z          | U(eq)   |
|------|-----------|-----------|------------|---------|
| S1   | 738.5(9)  | 7137.0(9) | 8216.6(5)  | 40.3(2) |
| S2   | 1119.2(9) | 6657.3(9) | 6266.1(5)  | 41.1(2) |
| O1   | -971(3)   | 6908(3)   | 7874.6(15) | 55.1(6) |
| O2   | 1363(3)   | 8527(3)   | 8853.3(15) | 57.5(6) |
| O3   | 159(3)    | 5085(3)   | 6185.6(15) | 56.2(6) |
| O4   | 2555(3)   | 6912(3)   | 5729.0(14) | 56.7(6) |

|     |          |          |            |           |
|-----|----------|----------|------------|-----------|
| N1  | 1943(3)  | 7200(3)  | 7327.2(15) | 38.5(5)   |
| C4  | -250(4)  | 8094(4)  | 6116.7(18) | 40.8(7)   |
| C7  | 1116(4)  | 5395(4)  | 8671(2)    | 41.6(7)   |
| C8  | 3789(4)  | 7625(4)  | 7480(2)    | 44.3(7)   |
| C9  | 4415(4)  | 9431(4)  | 7630(3)    | 57.3(9)   |
| C10 | -2343(5) | 10273(5) | 5756(2)    | 64.8(10)  |
| C11 | 4752(4)  | 6465(4)  | 7407(3)    | 61.2(9)   |
| C12 | 366(4)   | 9734(4)  | 6260(2)    | 50.6(8)   |
| C13 | -1893(4) | 7534(5)  | 5797(2)    | 53.8(8)   |
| C14 | 333(4)   | 3871(4)  | 8265(2)    | 51.2(8)   |
| C15 | 2127(5)  | 5570(5)  | 9440(2)    | 59.1(9)   |
| C16 | -703(5)  | 10836(4) | 6076(2)    | 60.0(9)   |
| C17 | 1603(6)  | 2662(5)  | 9390(3)    | 72.6(11)  |
| C18 | 2356(6)  | 4170(5)  | 9806(3)    | 75.0(11)  |
| C19 | -2934(5) | 8655(5)  | 5618(3)    | 66.7(10)  |
| C20 | 596(5)   | 2513(5)  | 8627(3)    | 64.6(10)  |
| C21 | 6194(4)  | 9974(5)  | 8028(3)    | 63.6(10)  |
| O7  | 4836(9)  | 3837(8)  | 8035(5)    | 74.6(18)  |
| C44 | 5158(13) | 3898(11) | 6488(7)    | 72(2)     |
| C43 | 4252(5)  | 4665(5)  | 7134(4)    | 91.9(16)  |
| C30 | 6315(7)  | 9798(7)  | 8981(3)    | 102.8(17) |
| O6  | 4724(7)  | 4479(8)  | 6006(4)    | 74.9(16)  |
| C41 | 5193(15) | 3698(13) | 7411(10)   | 97(4)     |

**Table S4** Anisotropic Displacement Parameters ( $\text{\AA}^2 \times 10^3$ ) for **5c** (exp\_19725). The anisotropic displacement factor exponent takes the form:  $-2\pi^2[h^2a^{*2}U_{11}+2hka^*b^*U_{12}+\dots]$ .

| Atom | U <sub>11</sub> | U <sub>22</sub> | U <sub>33</sub> | U <sub>12</sub> | U <sub>13</sub> | U <sub>23</sub> |
|------|-----------------|-----------------|-----------------|-----------------|-----------------|-----------------|
| S1   | 39.3(4)         | 41.3(4)         | 43.6(4)         | 15.0(3)         | 5.3(3)          | 8.1(3)          |
| S2   | 43.2(4)         | 37.8(4)         | 41.4(4)         | 5.2(3)          | -1.1(3)         | 3.5(3)          |
| O1   | 34.9(11)        | 74.0(16)        | 64.8(14)        | 19.1(11)        | 8.8(10)         | 27.1(12)        |
| O2   | 80.0(16)        | 40.5(13)        | 51.6(13)        | 15.7(1 )        | 8.0(11)         | -1.7(10)        |
| O3   | 64.9(14)        | 36.2(12)        | 64.1(14)        | 0.4(10)         | -17.2(11)       | 4.8(10)         |
| O4   | 55.3(13)        | 67.1(16)        | 49.4(13)        | 14.4(12)        | 13.4(10)        | 7.8(11)         |
| N1   | 30.9(12)        | 42.1(14)        | 41.7(13)        | 5.1(10)         | 0.3(10)         | 3.6(10)         |
| C4   | 46.8(16)        | 40.8(16)        | 36.6(15)        | 8.2(13)         | -0.4(12)        | 9.9(12)         |
| C7   | 40.5(15)        | 40.7(16)        | 46.1(16)        | 10.0(13)        | 3.6(12)         | 11.0(13)        |
| C8   | 32.7(14)        | 47.0(18)        | 50.9(17)        | 6.0(13)         | -0.2(12)        | -0.1(13)        |
| C9   | 42.2(17)        | 46.6(19)        | 79(2)           | 3.6(15)         | -2.0(16)        | -0.0(17)        |

|     |          |          |          |          |           |          |
|-----|----------|----------|----------|----------|-----------|----------|
| C10 | 73(3)    | 81(3)    | 53(2)    | 40(2)    | 8.3(18)   | 22.2(19) |
| C11 | 35.0(17) | 55(2)    | 88(3)    | 8.2(15)  | -0.2(16)  | -7.0(18) |
| C12 | 59(2)    | 43.9(18) | 48.5(18) | 5.4(15)  | -3.6(15)  | 7.3(14)  |
| C13 | 44.3(17) | 60(2)    | 57.5(19) | 3.0(15)  | -2.5(14)  | 16.4(16) |
| C14 | 55.8(19) | 46.7(19) | 51.6(18) | 5.3(15)  | 0.3(15)   | 11.1(15) |
| C15 | 65(2)    | 56(2)    | 57(2)    | 12.0(17) | -11.3(16) | 9.1(16)  |
| C16 | 93(3)    | 46(2)    | 45.4(18) | 17.8(19) | 12.4(18)  | 11.9(15) |
| C17 | 89(3)    | 57(2)    | 80(3)    | 19(2)    | 4(2)      | 30(2)    |
| C18 | 87(3)    | 79(3)    | 66(2)    | 23(2)    | -15(2)    | 25(2)    |
| C19 | 51(2)    | 86(3)    | 70(2)    | 17(2)    | -1.6(17)  | 26(2)    |
| C20 | 74(2)    | 45(2)    | 74(2)    | 5.6(18)  | 5(2)      | 13.6(18) |
| C21 | 54(2)    | 56(2)    | 76(2)    | 2.4(17)  | -3.5(18)  | 0.5(18)  |
| O7  | 83(4)    | 65(4)    | 91(5)    | 41(3)    | 8(4)      | 35(4)    |
| C44 | 100(7)   | 57(5)    | 62(5)    | 20(5)    | 22(5)     | 7(4)     |
| C43 | 53(2)    | 43(2)    | 172(5)   | 13.8(18) | 14(3)     | -19(3)   |
| C30 | 95(4)    | 143(5)   | 68(3)    | 5(3)     | -1(2)     | 21(3)    |
| O6  | 71(4)    | 72(4)    | 72(4)    | 9(3)     | 18(3)     | -23(3)   |
| C41 | 90(8)    | 58(6)    | 150(12)  | 36(5)    | -15(8)    | 17(8)    |

**Table S5** Bond Lengths for **5c** (exp\_19725).

| Atom | Atom | Length/Å | Atom | Atom | Length/Å  |
|------|------|----------|------|------|-----------|
| S1   | O1   | 1.422(2) | C9   | C21  | 1.509(4)  |
| S1   | O2   | 1.421(2) | C10  | C16  | 1.377(5)  |
| S1   | N1   | 1.667(2) | C10  | C19  | 1.356(6)  |
| S1   | C7   | 1.758(3) | C11  | C43  | 1.500(5)  |
| S2   | O3   | 1.417(2) | C12  | C16  | 1.387(5)  |
| S2   | O4   | 1.423(2) | C13  | C19  | 1.383(5)  |
| S2   | N1   | 1.692(2) | C14  | C20  | 1.370(5)  |
| S2   | C4   | 1.762(3) | C15  | C18  | 1.398(5)  |
| N1   | C8   | 1.467(3) | C17  | C18  | 1.376(6)  |
| C4   | C12  | 1.377(4) | C17  | C20  | 1.370(6)  |
| C4   | C13  | 1.379(4) | C21  | C30  | 1.470(6)  |
| C7   | C14  | 1.390(4) | O7   | C43  | 1.697(8)  |
| C7   | C15  | 1.376(4) | C44  | C43  | 1.360(9)  |
| C8   | C9   | 1.509(4) | C43  | O6   | 1.740(8)  |
| C8   | C11  | 1.308(4) | C43  | C41  | 1.281(11) |

**Table S6** Bond Angles for **5c** (exp\_19725)

| Atom | Atom | Atom | Angle/°    | Atom | Atom | Atom | Angle/°  |
|------|------|------|------------|------|------|------|----------|
| O2   | S1   | O1   | 120.33(15) | C15  | C7   | C14  | 121.2(3) |
| N1   | S1   | O1   | 105.79(12) | C9   | C8   | N1   | 114.7(2) |
| N1   | S1   | O2   | 106.89(13) | C11  | C8   | N1   | 119.5(3) |
| C7   | S1   | O1   | 108.94(14) | C11  | C8   | C9   | 125.6(3) |
| C7   | S1   | O2   | 107.76(14) | C21  | C9   | C8   | 117.4(3) |
| C7   | S1   | N1   | 106.30(13) | C19  | C10  | C16  | 121.0(3) |
| O4   | S2   | O3   | 119.44(15) | C43  | C11  | C8   | 128.8(3) |
| N1   | S2   | O3   | 109.11(13) | C16  | C12  | C4   | 118.8(3) |
| N1   | S2   | O4   | 103.53(13) | C19  | C13  | C4   | 118.7(3) |
| C4   | S2   | O3   | 109.26(14) | C20  | C14  | C7   | 119.5(3) |
| C4   | S2   | O4   | 109.02(14) | C18  | C15  | C7   | 118.4(3) |
| C4   | S2   | N1   | 105.51(12) | C12  | C16  | C10  | 119.6(3) |
| S2   | N1   | S1   | 122.03(13) | C20  | C17  | C18  | 120.7(4) |
| C8   | N1   | S1   | 118.34(19) | C17  | C18  | C15  | 120.1(4) |
| C8   | N1   | S2   | 119.47(19) | C13  | C19  | C10  | 120.4(4) |
| C12  | C4   | S2   | 119.8(2)   | C17  | C20  | C14  | 120.2(4) |
| C13  | C4   | S2   | 118.6(2)   | C30  | C21  | C9   | 111.9(3) |
| C13  | C4   | C12  | 121.5(3)   | C44  | C43  | O7   | 100.5(6) |
| C14  | C7   | S1   | 119.2(2)   | C41  | C43  | O6   | 100.9(8) |
| C15  | C7   | S1   | 119.5(3)   |      |      |      |          |

**Table S7** Hydrogen Atom Coordinates ( $\text{\AA} \times 10^4$ ) and Isotropic Displacement Parameters ( $\text{\AA}^2 \times 10^3$ ) for **5c** (exp\_19725).

| Atom | x        | y        | z        | U(eq)    |
|------|----------|----------|----------|----------|
| H9a  | 4345(4)  | 9822(4)  | 7059(3)  | 68.7(11) |
| H9b  | 3638(4)  | 9967(4)  | 8022(3)  | 68.7(11) |
| H10  | -3057(5) | 11013(5) | 5634(2)  | 77.7(12) |
| H11  | 5904(4)  | 6804(4)  | 7542(3)  | 73.5(11) |
| H12  | 1477(4)  | 10096(4) | 6475(2)  | 60.8(9)  |
| H13  | -2294(4) | 6424(5)  | 5703(2)  | 64.5(10) |
| H14  | -364(4)  | 3774(4)  | 7752(2)  | 61.5(9)  |
| H15  | 2645(5)  | 6594(5)  | 9710(2)  | 70.9(11) |
| H16  | -313(5)  | 11948(4) | 6168(2)  | 72.0(11) |
| H17  | 1780(6)  | 1734(5)  | 9630(3)  | 87.2(13) |
| H18  | 3017(6)  | 4259(5)  | 10331(3) | 89.9(14) |
| H19  | -4045(5) | 8298(5)  | 5401(3)  | 80.0(12) |



|      |          |           |         |          |
|------|----------|-----------|---------|----------|
| H20  | 89(5)    | 1488(5)   | 8354(3) | 77.5(11) |
| H21a | 6971(4)  | 9330(5)   | 7698(3) | 76.4(12) |
| H21b | 6536(4)  | 11107(5)  | 7964(3) | 76.4(12) |
| H30a | 5930(50) | 8689(12)  | 9050(4) | 154(3)   |
| H30b | 7476(10) | 10090(50) | 9199(7) | 154(3)   |
| H30c | 5620(40) | 10510(40) | 9317(5) | 154(3)   |

**Table S8** Atomic Occupancy for **5c** (exp\_19725).

| Atom | Occupancy | Atom | Occupancy | Atom | Occupancy |
|------|-----------|------|-----------|------|-----------|
| O7   | 0.500000  | C44  | 0.500000  | O6   | 0.500000  |
| C41  | 0.500000  |      |           |      |           |

## 12. References

- [1] M. Lafrance, M. Roggen, E. M. Carreira, *Angew. Chem. Int. Ed.* **2012**, *51*, 3470.
- [2] H. Lin, Y. Liua, Z.-L. Wu, *Chem. Commun.* **2011**, *47*, 2610.
- [3] A. W. J. Logan, J. S. Parker, M. S. Hallside, J. W. Burton, *Org. Lett.* **2012**, *14*, 2940.
- [4] K. Smith, M. C. Elliott, D. H. Jones, *J. Org. Chem.* **2013**, *78*, 9526.
- [5] N. Marion, R. Gealageas, S. P. Nolan, *Org. Lett.* **2007**, *9*, 2653.
- [6] H. Zheng, M. Lejkowski, D. G. Hall, *Chem. Sci.* **2011**, *2*, 1305.
- [7] M. S. Hadfield, A.-L. Lee, *Org. Lett.* **2010**, *12*, 484.
- [8] S. Akai, R. Hanada, N. Fujiwara, Y. Kita, M. Egi, *Org. Lett.* **2010**, *12*, 4900.
- [9] T. Yasukawa, H. Miyamura, S. Kobayashi, *J. Am. Chem. Soc.* **2012**, *134*, 16963.
- [10] L. Du, P. Cao, J. Xing, Y. Lou, L. Jiang, L. Li, J. Liao, *Angew. Chem. Int. Ed.* **2013**, *52*, 4207.
- [11] H. J. Reich, E. K. Eisenhart, W. L. Whipple, M. J. Kelly, *J. Am. Chem. Soc.* **1988**, *110*, 6432.
- [12] M. Roggen, E. M. Carreira, *Angew. Chem. Int. Ed.* **2011**, *50*, 5568.
- [13] A. López-Pérez, J. Adrio, J. C. Carretero, *Org. Lett.* **2009**, *11*, 5514.
- [14] H. Chen, H. Jiang, C. Cai, J. Dong, W. Fu, *Org. Lett.* **2011**, *13*, 992.
- [15] G. Battistuzzi, S. Cacchi, G. Fabrizi, *Org. Lett.* **2003**, *5*, 777.
- [16] J. McNulty, C. Zepeda-Velázquez, D. McLeod, *Green Chem.* **2013**, *15*, 3146.

- [17] M. A. Bohn, A. Schmidt, G. Hilt, M. Dindaroğlu, H.-G. Schmalz, *Angew. Chem. Int. Ed.* **2011**, *50*, 9689.
- [18] P. Valenta, N. A. Drucker, J. W. Bode, P. J. Walsh, *Org. Lett.* **2009**, *11*, 2117.
- [19] A. D. Fotiadou, A. L. Zografos, *Org. Lett.* **2012**, *14*, 5664.
- [20] T. Xiong, Y. Li, L. Mao, Q. Zhang, Q. Zhang, *Chem. Commun.* **2012**, *48*, 2246.
